# Supplementary material for: Observational retrospective study of the association of initial healthcare provider for new-onset low back pain with early and long-term opioid use
Source: PubMed Central journal article supplement — BMJ Open. 2019 Sep 20;9(9):e028633. doi: 10.1136/bmjopen-2018-028633 (PMC6756340; doi:10.1136/bmjopen-2018-028633), 2019-09-20
Supplement: bmjopen-2018-028633.draft_revisions.pdf [file bmjopen-2018-028633.draft_revisions.pdf]

# BMJ Open

BMJ Open is committed to open peer review. As part of this commitment we make the peer review history of every article we publish publicly available.

When an article is published we post the peer reviewers' comments and the authors' responses online. We also post the versions of the paper that were used during peer review. These are the versions that the peer review comments apply to.

The versions of the paper that follow are the versions that were submitted during the peer review process. They are not the versions of record or the final published versions. They should not be cited or distributed as the published version of this manuscript.

BMJ Open is an open access journal and the full, final, typeset and author-corrected version of record of the manuscript is available on our site with no access controls, subscription charges or pay-per-view fees (<http://bmjopen.bmj.com>).

If you have any questions on BMJ Open's open peer review process please email [info.bmjopen@bmj.com](mailto:info.bmjopen@bmj.com)

# BMJ Open

## Non-pharmacologic Therapies for New-onset Low Back Pain: Predictors of Early and Long-Term Opioid Use in the United States

|                               |                                                                                                                                                                                                                                                                                                                                                                                                                                                                                                                                                                                                                                                                                                                                                                                                                                                                                                                                                                                                                                                                                   |
|-------------------------------|-----------------------------------------------------------------------------------------------------------------------------------------------------------------------------------------------------------------------------------------------------------------------------------------------------------------------------------------------------------------------------------------------------------------------------------------------------------------------------------------------------------------------------------------------------------------------------------------------------------------------------------------------------------------------------------------------------------------------------------------------------------------------------------------------------------------------------------------------------------------------------------------------------------------------------------------------------------------------------------------------------------------------------------------------------------------------------------|
| Journal:                      | <i>BMJ Open</i>                                                                                                                                                                                                                                                                                                                                                                                                                                                                                                                                                                                                                                                                                                                                                                                                                                                                                                                                                                                                                                                                   |
| Manuscript ID                 | bmjopen-2018-028633                                                                                                                                                                                                                                                                                                                                                                                                                                                                                                                                                                                                                                                                                                                                                                                                                                                                                                                                                                                                                                                               |
| Article Type:                 | Research                                                                                                                                                                                                                                                                                                                                                                                                                                                                                                                                                                                                                                                                                                                                                                                                                                                                                                                                                                                                                                                                          |
| Date Submitted by the Author: | 18-Dec-2018                                                                                                                                                                                                                                                                                                                                                                                                                                                                                                                                                                                                                                                                                                                                                                                                                                                                                                                                                                                                                                                                       |
| Complete List of Authors:     | Kazis, Lewis; Boston University School of Public Health, Department of Health Law, Policy and Management<br>Ameli, Omid; OptumLabs; Boston University School of Public Health, Department of Health Law, Policy and Management<br>Rothendler, James; Boston University School of Public Health, Department of Health Law, Policy and Management<br>Garrity, Brigid; Boston University School of Public Health, Department of Health Law, Policy and Management<br>Cabral, Howard; Boston University School of Public Health, Department of Biostatistics<br>McDonough, Christine; University of Pittsburgh School of Health and Rehabilitation Sciences<br>Carey, Kathleen; Boston University School of Public Health, Department of Health Law, Policy and Management<br>Stein, Michael; Boston University School of Public Health, Department of Health Law, Policy and Management<br>Sanghavi, Darshak; OptumLabs<br>Elton, David; OptumHealth<br>Fritz, Julie; University of Utah, Physical Therapy and Athletic Training<br>Saper, Robert; Boston University Medical Campus, |
| Keywords:                     | Early and long-term opioid use, Opioid use, Back pain < ORTHOPAEDIC & TRAUMA SURGERY, PAIN MANAGEMENT                                                                                                                                                                                                                                                                                                                                                                                                                                                                                                                                                                                                                                                                                                                                                                                                                                                                                                                                                                             |
|                               |                                                                                                                                                                                                                                                                                                                                                                                                                                                                                                                                                                                                                                                                                                                                                                                                                                                                                                                                                                                                                                                                                   |

SCHOLARONE™  
Manuscripts

1  
2  
3  
4  
5  
6  
7  
8  
9  
10  
11  
12  
13  
14  
15  
16  
17  
18  
19  
20  
21  
22  
23  
24  
25  
26  
27  
28  
29  
30  
31  
32  
33  
34  
35  
36  
37  
38  
39  
40  
41  
42  
43  
44  
45  
46  
47  
48  
49  
50  
51  
52  
53  
54  
55  
56  
57  
58  
59  
60

Non-pharmacologic Therapies for New-onset Low Back Pain:  
Predictors of Early and Long-Term Opioid Use in the United States

Lewis E. Kazis, ScD<sup>1</sup>; Omid Ameli, MD, MPH.<sup>1,2,3</sup>; James Rothendler, MD<sup>1</sup>;  
Brigid Garrity, MS, MPH<sup>1</sup>; Howard Cabral, PhD<sup>4</sup>; Christine McDonough, PhD, PT<sup>5</sup>; Kathleen  
Carey, PhD<sup>1</sup>; Michael Stein, MD<sup>1</sup>; Darshak Sanghavi, MD<sup>3</sup>; David Elton, DC<sup>6</sup>;  
Julie Fritz, PhD, PT<sup>7</sup>; and Robert Saper, MD, MPH<sup>1,8</sup>.

Author Affiliations: 1. Boston University School of Public Health, Department of Health  
Law, Policy and Management, Boston, MA; 2. OptumLabs Visiting Scholar, OptumLabs,  
Cambridge, MA; 3. OptumLabs, Cambridge, MA; 4. Boston University School of Public  
Health, Department of Biostatistics, Boston, MA; 5. University of Pittsburgh School of  
Health and Rehabilitation Sciences, Pittsburgh, PA, 6. OptumHealth, Eden Prairie, MN 7.  
University of Utah, Department of Physical Therapy, Salt Lake City, UT. 8. Department of  
Family Medicine, Boston Medical Center, Boston, MA.

Corresponding Author: Lewis E. Kazis, Sc.D.  
Professor of Health Policy and Management  
Director, Health Outcomes Unit and Center for the Assessment of Pharmaceutical Practices  
(CAPP) (Est. 2000)  
Department of Health Law, Policy and Management  
Boston University School of Public Health  
715 Albany Street, Talbot 5 West (532)  
Boston MA. 02118  
Telephone: 617-358-2291  
[lek@bu.edu](mailto:lek@bu.edu)

**Word count:** Abstract: 297 words; Manuscript: 2,968 words

## Abstract

**Objective:** This study examined the association of initial provider treatment with early and long-term opioid use in a national sample of patients with new-onset low back pain (LBP).

**Design:** A retrospective cohort study of patients with new-onset LBP from 2008-2013.

**Setting:** The study evaluated outpatient and inpatient claims from patient visits, pharmacy claims, and inpatient and outpatient procedures with initial providers seen for new onset LBP.

**Participants:** 216,504 individuals aged 18 or older across the United States who were diagnosed with new-onset LBP and were opioid-naïve were included. Participants had commercial or Medicare Advantage insurance through a private health plan.

**Primary and Secondary Outcome Measures:** The primary independent variables are initial provider and early conservative therapy (chiropractic, physical therapy and acupuncture). Early opioid use (within 30 days of the index visit) following new LBP visit and long-term opioid use (within 60 days of the index date and either 120 or more days' supply of opioids over 12 months, or 90 days or more supply of opioids and 10 or more opioid prescriptions over 12 months).

**Results:** Early use of opioids was 22% in the first 30 days. Patients who received initial treatment from chiropractors or physical therapists had decreased odds of early opioid use compared to those who received initial treatment from primary care physicians (PCPs) [AOR (95% CI): 0.10 (0.09,0.10) and 0.15 (0.13,0.17) respectively]. Compared to PCP visits, initial chiropractic and physical therapy also were associated with decreased odds of long-term opioid use in a propensity-score matched sample [OR (95% CI): 0.21 (0.16, 0.27) and 0.29 (0.12, 0.69) respectively].

**Conclusions:** Initial visits to chiropractors or physical therapists is associated with substantially decreased early and long-term use of opioids. Incentivizing use of conservative therapists may be a strategy to reduce risks of short- and long-term opioid use.

## Article Summary

- This is a nationwide study comparing short and long term opioid use among patients with low back pain who seek initial care from non-pharmacologic conservative therapists, physician specialists and PCPs.
- We go beyond investigating the odds of opioid use for a one-time LBP event, by examining associations with both early and long-term opioid use among patients with new-onset LBP, using rigorous definitions of recent onset.
- We provide a broader depiction of conservative therapy than prior studies, as we included chiropractors and acupuncturists, as well as other MD specialists.
- This study assesses the impact of state access to physical therapy on choice of initial provider.
- This is a claims study; therefore, causation cannot be inferred, and the number of patient characteristics we could assess is limited.

**Funding statement:** This work was supported by UnitedHealthcare, the American Physical Therapy Association, and OptumLabs grant number SOW#3006.

**Data availability statement:** No additional data available

## Introduction

Over the past decade, there has been a concerning increase in opioid use in the United States, with over 12 million Americans reporting long-term opioid use or misuse in 2015.<sup>1-3</sup> The National Survey on Drug Use and Health reported over 42,000 prescription opioid-related deaths in 2016, with total estimated costs of prescription opioid use reaching \$78.5 billion.<sup>4,5</sup> One of the most common conditions for which opioids are prescribed is low back pain (LBP).<sup>2-4</sup> Several studies have reported that opioids are the most frequently prescribed medication for treatment of LBP,<sup>4,5</sup> and more than half of opioid users report having a history of back pain.<sup>6</sup> This frequency of opioid prescribing is particularly concerning given that LBP is one of the three most common conditions for which Americans seek medical care.<sup>2,7</sup>

Given the high prevalence of LBP, several treatment guidelines have been issued for treatment, and specifically discourage opioids to treat pain. The American College of Physicians (ACP) and the Centers for Disease Control (CDC) recommend non-pharmacologic treatments including exercise, physical therapy (PT), spinal manipulation, acupuncture, and massage.<sup>2,8</sup> These guidelines indicate that opioids should not be considered as a treatment option for LBP unless recommended treatments fail and if the benefits of their use outweigh the risk for the individual patient.<sup>2,8</sup> Despite these recommendations, non-pharmacologic therapies like chiropractic care, PT, and acupuncture are rarely used for treatment of acute pain, and physicians frequently prescribe opioids for acute onset LBP.<sup>8-11</sup>

Several studies have attempted to elucidate the predictors of opioid use among patients with LBP. Comparisons of the treatment patterns of primary care physicians (PCPs) and conservative therapists suggest that the use of non-pharmacologic therapies for LBP may decrease the likelihood of opioid use.<sup>9</sup> Despite these findings, there has been little research

1  
2  
3 comparing early and long-term opioid use among patients seeking initial care from various  
4 providers, including primary care physicians, chiropractors, physical therapists, and  
5  
6  
7  
8 acupuncturists as well as patients seeing orthopedic surgeons, neurosurgeons and emergency  
9  
10 physicians.<sup>12,13</sup> The purpose of this study is to examine the association of type of initial provider  
11  
12 with subsequent early and long-term opioid use in a national sample of patients with new-onset  
13  
14 LBP whose treatment could reasonably be managed by non-pharmacologic therapy.  
15  
16  
17  
18

## 19 **Methods**

### 20 *Study Sample*

21  
22 We conducted a retrospective study of patients seen by a medical provider for new-onset,  
23  
24 LBP management and who were opioid-naïve at the time of the initial visit (Boston Medical  
25  
26 Center IRB approval number: H-36499). We used claims data from the OptumLabs® Data  
27  
28 Warehouse (OLDW), which includes de-identified claims data for privately insured and  
29  
30 Medicare Advantage enrollees in a large, private, U.S. health plan. The database contains  
31  
32 longitudinal health information on enrollees, representing a diverse mixture of ages, ethnicities  
33  
34 and geographical regions across the United States. The health plan provides comprehensive full  
35  
36 insurance coverage for physician, hospital, and prescription drug services.  
37  
38  
39  
40  
41

42 The index episode of LBP was identified using claims from 2008-2013 to ascertain pre-  
43  
44 index visit opioid use and back conditions and to allow a follow-up period. Patients needed to  
45  
46 have at least 24 months of medical and pharmacy available claims data prior to and after the  
47  
48 index date. The study sample included adults aged 18 years or older with a new outpatient  
49  
50 diagnosis of LBP who had commercial or Medicare Advantage insurance through a large,  
51  
52 private, U.S. health plan. To qualify, LBP diagnosis appeared in the first location on a patient's  
53  
54  
55  
56  
57  
58  
59  
60

1  
2  
3 index date insurance claim. New-onset LBP was defined as no diagnosis of LBP or back  
4  
5 procedures, including spinal surgery, spinal injections, and spinal nerve stimulators during the  
6  
7 12-month period prior to the index event (Figure 1).  
8  
9

### 10 *Exclusion Criteria*

11  
12 Patients were excluded if they had a prescription for opioids in the 12 months prior to the  
13  
14 index event. Patients with a diagnosis of neoplasia in this 12-month period or within a 3-month  
15  
16 period after the index LBP event were also excluded. Each patient was only included in the study  
17  
18 once.  
19  
20

### 21 *Patient characteristics*

22  
23 We identified patient characteristics and comorbidities using ICD-9 codes for claims in  
24  
25 the two years prior to the index event. Characteristics included age, sex, race, insurance  
26  
27 (commercial or Medicare Advantage), and state of residence. Medical conditions also called  
28  
29 physical comorbidities were calculated using the Elixhauser index.<sup>14</sup> Other comorbidities,  
30  
31 mental health conditions, chronic pain, and fibromyalgia are included and based on prior studies  
32  
33 that have reported an association between such conditions and opioid use.<sup>15,16</sup> Mental health  
34  
35 comorbidities were selected from the Centers for Medicare and Medicaid Services report on  
36  
37 prevalence of mental health conditions.<sup>17</sup>  
38  
39  
40  
41

### 42 *Dependent variables*

43  
44 Early opioid use was defined as an opioid fill within 30 days of the index visit. Long-  
45  
46 term use was defined as an initial opioid fill within 60 days of the index date and either 120 or  
47  
48 more days' supply of opioids over 12 months, or 90 days or more supply of opioids and 10 or  
49  
50 more opioid prescriptions over 12 months. This definition relied on previous literature.<sup>6,18</sup>  
51  
52

### 53 *Independent variables*



1  
2  
3 Based on the index claim date of patients with an eligible LBP diagnosis, initial providers  
4 were characterized as physical therapist, chiropractor, acupuncturist, primary care physician,  
5  
6 orthopedic surgeon, emergency medicine physician, neurosurgeon, or physical medicine and  
7  
8 rehabilitation physician according to provider specialty and procedure codes. If a patient saw  
9  
10 both a physician and a conservative therapist on the index date, the initial provider was assumed  
11  
12 to be the physician.  
13  
14  
15

16  
17 Patient access to PT in every state was classified as either ‘limited’, ‘provisional’, or  
18  
19 ‘unrestricted’, based on the three levels of patient access outlined by the American Physical  
20  
21 Therapy Association.<sup>19</sup> These different levels were on the basis of a patient needing a  
22  
23 prescription from a physician to access a PT. There were six states with limited access to PT, 26  
24  
25 states with provisional access, and 18 states with unrestricted access to PT.<sup>19</sup>  
26  
27

### 28 *Statistical Analyses*

29  
30  
31 The main analyses included multivariable logistic regressions with early opioid use and  
32  
33 long-term opioid use as outcomes and entry-point provider as the main independent variable. The  
34  
35 reference group for these comparisons was patients who visited PCP first for the LBP. All  
36  
37 models were adjusted for age, sex, race/ethnicity, geographic region, the Elixhauser index as a  
38  
39 continuous count of physical co-morbidities and mental health comorbidities and insurance type.  
40  
41  
42

43  
44 As a supplemental alternative to adjusting for baseline confounding through regression  
45  
46 adjustment, we invoked two-to-one propensity score matching without replacement to achieve  
47  
48 baseline covariate balance among patients who initially saw chiropractor first, saw PT first or  
49  
50 who saw PCP first. The propensity scores were calculated as predicted probabilities of  
51  
52 chiropractor first and PT first as opposed to PCP first as a function of the following matching  
53  
54 variables: age, sex, race/ethnicity, baseline comorbidities, calendar year of the index visit, copay,  
55  
56  
57  
58  
59  
60

1  
2  
3 deductible, plan type, history of pregnancy within 12 months, history of vehicular accidents  
4 within 12 months, and history of opioid use within the year prior to the opioid free period. The  
5 propensity score for PT also considered the state PT access category. Race and ethnicity are  
6 defined as Black, Hispanic, Asian, or White. Ethnicity was assigned by an external vendor based  
7 on a structured, rule-based system that combines analysis of first names, middle names,  
8 surnames, and surname prefixes and suffixes, with geographic reference files. Values were then  
9 categorized in OLDW to comply with data de-identification requirements. We examined the  
10 covariate balance in the matched samples through the standardized mean differences of each  
11 covariate. Finally, we applied a logistic model using the matched sample to assess the association  
12 between chiropractor compared to PCP as the initial provider seen and PT compared to PCP as  
13 the initial provider seen with the outcomes early term opioid use and separately long-term opioid  
14 use (binary variables).

15  
16  
17  
18  
19  
20  
21  
22  
23  
24  
25  
26  
27  
28  
29  
30  
31 For all logistic models, we calculated adjusted odds ratios with 95% Wald confidence  
32 intervals. We also evaluated overall model fit, model discrimination (C statistic) and calibration  
33 (Hosmer Lemeshow test) for all logistic models (supplement Table 1). While the Hosmer  
34 Lemeshow models were significant, this was likely due to the large sample sizes used for this  
35 study. The differences between the observed and expected values within the decile groups was  
36 relatively small suggesting credible calibration of the models and statistical significance due to  
37 the large sample sizes.<sup>20,21</sup> We further validated the covariate-adjusted ORs of early use and  
38 long-term use as a function of initial provider using the bootstrap method.<sup>22</sup> The resampling rate  
39 was 200 with a two-third/one-third sampling ratio. The bootstrapped estimates were then used to  
40 construct means and 95% confidence intervals for the ORs. The estimates reported using  
41  
42  
43  
44  
45  
46  
47  
48  
49  
50  
51  
52  
53  
54  
55  
56  
57  
58  
59  
60

1  
2  
3 bootstrapping indicated little or no differences with the actual results (supplement Tables 2 and  
4  
5 3).

### 6 7 *Patient and Public Involvement*

8  
9  
10 Patients and the public were not involved in this project.

## 11 12 **Results**

13  
14 A total of 8,797,787 patients had a visit with a provider for LBP during the study period,  
15 and 216,504 met all inclusion/exclusion criteria (Figure 1). More than half the patients initially  
16 saw a PCP (n=114,782, 53.0%), and the next most frequent initial provider seen was chiropractor  
17 (50,041, 23.1%) followed by physical therapist 3,499 (1.6%) and acupuncturist 1,839 (0.8%).  
18

19 Patient demographics by initial provider are shown in Table 1. Most patients had commercial  
20 insurance (183,117, 84.7%); the remainder had Medicare Advantage coverage. Of patients with  
21 an acupuncturist as the initial provider type, nearly all (99.3%) had commercial insurance. For all  
22 other initial provider types, 87-89% of patients had commercial insurance. Approximately 18%  
23 of patients received an opioid fill within 3 days of the initial LBP visit, 22% received such a fill  
24 within the first 30 days and 1.2% met criteria for long-term use.  
25  
26  
27  
28  
29  
30  
31  
32  
33  
34  
35  
36

37 Initial provider was associated with short and long-term opioid use outcomes in the  
38 adjusted multivariate models (Table 2, Figure 2, supplement Table 4). Compared to seeing a PCP  
39 as initial provider, patients who first saw conservative therapists (chiropractor, acupuncturists  
40 and PTs) all had significantly decreased odds of both early and long-term opioid use. Among  
41 patients with new-onset LBP who were previously opioid-naive, those who sought initial care  
42 from chiropractors had 90% decreased odds [95% CI: (0.09,0.10)] and acupuncturists had 91%  
43 decreased odds [95% CI: (0.07,0.12)] of early opioid use compared to those who initially saw  
44 PCPs (Table 2, Figure 2). Patients who sought initial care from PTs had 85% decreased odds  
45  
46  
47  
48  
49  
50  
51  
52  
53  
54  
55  
56  
57  
58  
59  
60

1  
2  
3 [95% CI: (0.13,0.17)] of early opioid use compared to those who initially saw PCPs.  
4  
5 Chiropractors, acupuncturists and PTs all had major decreased odds of long term opioid use  
6  
7 compared to those who initially saw PCPs. Orthopedic surgeons and neurosurgeons as initial  
8  
9 providers decreased patients' odds of early opioid use, while patients seeing emergency  
10  
11 physicians initially had significantly increased odds of early opioid use.  
12  
13

14  
15 Several states have mandated insurance benefits that remove cost barriers for  
16  
17 conservative treatment. Patients in states with provisional access to PT had 1.21 (95% CI: 1.05,  
18  
19 1.40) times the odds of seeing a physical therapist initially compared to patients in states with  
20  
21 limited PT access. Patients in states with unlimited access to PT had 1.67 (95% CI: 1.40, 1.98)  
22  
23 times the odds of seeing a physical therapist initially compared to patients in states with limited  
24  
25 PT access.  
26  
27

28  
29 Patients with anxiety, bipolar disorder, and depression had significantly increased odds of  
30  
31 long-term opioid use, as did those diagnosed with drug use disorders and fibromyalgia/chronic  
32  
33 pain/fatigue (supplement Table 5).  
34

35  
36 Propensity-score matched odds of long-term opioid use were significantly lower for  
37  
38 chiropractic care first compared to PCP first and for PT first as compared to PCP first with odds  
39  
40 ratios consistent with findings in our primary covariate-adjusted logistic models (detailed results  
41  
42 presented in supplement Table 6).  
43  
44

## 45 46 47 **Discussion**

48  
49 Initial care from conservative therapists in those with LBP was associated with a marked  
50  
51 decrease in the odds of short and long term opioid use. To our knowledge, this is one of the first  
52  
53  
54  
55  
56  
57  
58  
59  
60

1  
2  
3 national studies to compare short and long term opioid use among patients with LBP who seek  
4 initial care from non-pharmacologic conservative therapists, physician specialists and PCPs.  
5  
6

7  
8 Several factors may help explain the protective effect of conservative therapists. Since  
9 non-physicians are unable to prescribe opioids, patients seeking conservative therapy do not  
10 receive opioid prescriptions at the index visit, and subsequent visits to an MD would be required  
11 to obtain such prescriptions. Additionally, the conservative therapy provided may result in  
12 decreased pain so that patients no longer see a need for opioid medications. Chiropractors and  
13 physical therapists are both trained to use exercises and spinal manipulation, which have been  
14 shown to be effective for treatment of LBP.<sup>23</sup> Therefore and importantly, use of conservative  
15 therapists may prevent the need for use of opioid or MD visits by providing evidence-based  
16 interventions.  
17  
18  
19  
20  
21  
22  
23  
24  
25  
26  
27

28 Notably, state access to PT had a considerable association with choice of initial provider.  
29 Compared to states with limited access to PT, patients in states with unlimited and provisional  
30 access had 67% and 21% higher odds of visiting PT initially, respectively. Given that initial PT  
31 is associated with significant reductions in early and long-term opioid use, these trends in PT  
32 access are extremely important.  
33  
34  
35  
36  
37  
38  
39

#### 40 *Comparisons to prior studies*

41  
42 Our results are consistent with prior studies showing high rates of opioid prescription fills  
43 for patients with LBP who were seen by emergency department physicians.<sup>3,24</sup> While there are  
44 very few studies suggesting that PT and chiropractors are used in emergency departments in the  
45 United States<sup>25</sup>, other countries have successfully introduced PTs into emergency departments to  
46 treat patients with LBP.<sup>26-28</sup>  
47  
48  
49  
50  
51  
52  
53  
54  
55  
56  
57  
58  
59  
60

1  
2  
3 Certain comorbidities were also associated with increased odds of opioid use. Patients  
4 with fibromyalgia, chronic pain, and fatigue and those with certain psychiatric conditions,  
5 including anxiety, bipolar disorder, and depression had greater odds of long-term opioid use than  
6 patients without these disorders. This is consistent with recent evidence suggesting that adults  
7 with mental health conditions account for half of opioid prescriptions in the United States.<sup>29</sup>  
8  
9

10  
11  
12 A recent study by Frogner et al. also found that LBP patients who saw PT initially had  
13 lower opioid use, although this study only focused on six states.<sup>13</sup> Sun et al. found that early  
14 physical therapy was associated with decreased opioid use among patients with musculoskeletal  
15 pain, but this study only evaluated opioid use beginning 90 days after the initial visit and did not  
16 examine any initial providers other than physical therapists.<sup>30</sup> Another recent study by Hayward  
17 et al. evaluated the use of non-opioid treatments from various providers, including physical  
18 therapists and physicians, however this was a descriptive study across only 16 states.<sup>31</sup> Our study  
19 examines the association of conservative therapy on opioid use with a sample that is national in  
20 scope. We also provide a broader depiction of conservative therapy, as we included  
21 chiropractors and acupuncturists, as well as other MD specialists. Importantly, we find that other  
22 conservative therapists including chiropractors and acupuncturists when seen first after a new  
23 episode of LBP are protective of early and long term use of opioids when compared with PCP's.  
24 Finally, we go beyond investigating the odds of opioid use for a one-time LBP event, by  
25 examining associations with both early and long-term opioid use among patients with new-onset  
26 LBP, using rigorous definitions of recent onset.  
27  
28  
29  
30  
31  
32  
33  
34  
35  
36  
37  
38  
39  
40  
41  
42  
43  
44  
45  
46  
47  
48

49 Fritz et al. found that early PT was associated with decreased opioid prescriptions<sup>32</sup>, and a  
50 review by Ojha et al. noted that early PT as treatment for musculoskeletal disorders was  
51 associated with decreased frequency of opioid prescriptions, although this was based on a limited  
52  
53  
54  
55  
56  
57  
58  
59  
60

1  
2  
3 number of outcomes.<sup>33</sup> Thackerary et al. also suggested that the odds of receiving an opioid  
4 prescription among Medicaid beneficiaries were reduced for those who had a PT consult, as  
5 compared to those who did not.<sup>34</sup> While these studies did not measure the odds of opioid use  
6 among patients who saw initial PT compared to other initial providers, our results are consistent  
7 with previously published reports that PT is associated with lower odds of opioid use.  
8  
9  
10  
11  
12  
13

#### 14 *Limitations*

15  
16  
17 There are several limitations to this study. Analysis was conducted using claims data,  
18 limiting our generalizability beyond commercial and Medicare Advantage enrolled patients.  
19 However, the sample is national in scope and provides a range of sociodemographic and clinical  
20 characteristics. The use of claims data also limited some of the clinical patient characteristics we  
21 could assess, such as severity of the index back pain episode. The use of a count of comorbidities  
22 may not be a reliable proxy for clinical severity of an individual. However, multiple studies have  
23 shown comparable baseline pain scores for those who choose conservative therapists compared  
24 to those who choose to see physicians initially.<sup>35-37</sup> While they did not report a significant  
25 difference in mean pain scores, Carey et al. also suggested that there was a significant difference  
26 between adults seeking care compared to adults who did not seek care when the duration of pain  
27 was less than or greater than or equal to two weeks.<sup>35</sup>  
28  
29  
30  
31  
32  
33  
34  
35  
36  
37  
38  
39  
40  
41

42 Selection bias due to unmeasured characteristics of patients seeking conservative and  
43 non-conservative care and accessibility of conservative therapists may explain some of the  
44 consumer choices of initial provider and MD prescribing of opioids. However, our propensity-  
45 score matching that balanced our groups may mitigate some of this concern by attempting to  
46 control for such differences. Last, causality cannot be inferred given that this study was an  
47 observational quasi-experimental design.  
48  
49  
50  
51  
52  
53  
54  
55  
56  
57  
58  
59  
60

### *Policy Implications and Future Research*

In conclusion, our results suggest that use of conservative therapists as initial providers for new-onset LBP are associated with lower odds of early and long-term use of opioids. Approaches to incentivizing use of conservative therapists might include lowering out-of-pocket costs for PT and chiropractor visits; reducing gatekeeper requirements; and increasing the number of conservative therapists available to consumers within insurance networks. Further research in other settings and prospective pragmatic trials will be useful to confirm our findings and to better understand other factors that influence choice of initial providers for LBP. Future research should include personal factors such as preferences related to opioid use, and medical, non-medical and specialists as initial providers. Factors related to health plan benefit design such as out-of-pocket costs for treatment alternatives (e.g. PT and chiropractor visits, opioids) and impact of gatekeeper requirements on care patterns should be investigated.

### **Acknowledgements**

We thank members of the OptumLabs steering committee for their feedback and advice on this project. We thank in particular: Henry Henk, PhD, OptumLabs and Pamela C. Hansen, PhD, OptumLabs.

### **Author contributions**

Lewis Kazis, Omid Ameli, James Rothendler, Christine McDonough, Kathleen Carey, Howard Cabral, and Robert Saper were involved in devising the topic. Omid Ameli and Howard Cabral were responsible for the analyses of the study. All authors contributed to the computational framework of this study. All authors participated in discussion of the results and creation of the manuscript. All editors were involved in the editing of the manuscript.

We have no competing interests to declare. Omid Ameli and Darshak Sanghavi work for OptumLabs but have no competing interests.



## References

1. Hughes A, Williams M, Lipari R, Bose J. Prescription drug use and misuse in the United States: results from the 2015 National Survey on Drug Use and Health. 2016 September.
2. Dowell D, Haegerich TM, Chou R. CDC Guideline for Prescribing Opioids for Chronic Pain—United States, 2016. *Jama*. 2016;315(15):1624.
3. Shmagel A, Ngo L, Ensrud K, Foley R. Prescription Medication Use Among Community-Based U.S. Adults With Chronic Low Back Pain: A Cross-Sectional Population Based Study. *The Journal of Pain*. 2018;19(10):1104–12.
4. Opioid Overdose [Internet]. Centers for Disease Control and Prevention. Centers for Disease Control and Prevention; 2017 [cited 2018Nov6]. Available from: <https://www.cdc.gov/drugoverdose/data/statedeaths.html>
5. Gore M, Tai K-S, Sadosky A, Leslie D, Stacey BR. Use and Costs of Prescription Medications and Alternative Treatments in Patients with Osteoarthritis and Chronic Low Back Pain in Community-Based Settings. *Pain Practice*. 2012May;12(7):550–60.
6. Boudreau D, Von Korff M, Rutter CM, Saunders C, Ray GT, Sullivan M, et al. Trends in De-facto Long-term Opioid Therapy for Chronic NonCancer Pain. *Pharmacoepidemiology and Drug Safety*. 2009Dec;18(12): 1166–75.
7. Licciardone JC. The epidemiology and medical management of low back pain during ambulatory medical care visits in the United States. *Osteopathic Medicine and Primary Care*. 2008;2(1):11.
8. Qaseem A, Wilt TJ, McLean RM, Forciea MA. Noninvasive Treatments for Acute, Subacute, and Chronic Low Back Pain. *Annals of Internal Medicine*. 2017;166(7).

- 1  
2  
3 9. Fritz JM, Kim J, Dorius J. Importance of the type of provider seen to begin health care for a  
4 new episode low back pain: associations with future utilization and costs. *Journal of Evaluation*  
5  
6 in *Clinical Practice*. 2015;22(2):247–52.  
7  
8
- 9  
10 10. Cherkin DC, Deyo RA, Wheeler K, Ciol MA. Physician Variation in Diagnostic Testing for  
11  
12 Low Back Pain. Who You See Is What You Get. *Arthritis & Rheumatism*. 1994;37(1):15–22.  
13
- 14 11. Webster BS, Cifuentes M, Verma S, Pransky G. Geographic variation in opioid prescribing  
15  
16 for acute, work-related, low back pain and associated factors: A multilevel analysis. *American*  
17  
18 *Journal of Industrial Medicine*. 2009;52(2):162–71.  
19
- 20 12. Fritz JM, Cleland JA, Speckman M, Brennan GP, Hunter SJ. Physical Therapy for Acute  
21  
22 Low Back Pain. *Spine*. 2008;33(16):1800–5.  
23  
24
- 25 13. Frogner BK, Harwood K, Andrilla CHA, Schwartz M, Pines JM. Physical Therapy as the  
26  
27 First Point of Care to Treat Low Back Pain: An Instrumental Variables Approach to Estimate  
28  
29 Impact on Opioid Prescription, Health Care Utilization, and Costs. *Health Services Research*.  
30  
31 2018;  
32  
33
- 34 14. Elixhauser A, Steiner C, Harris DR, Coffey RM. Comorbidity Measures for Use with  
35  
36 Administrative Data. *Medical Care*. 1998;36(1):8–27.  
37  
38
- 39 15. Feingold D, Brill S, Goor-Aryeh I, Delayahu Y, Lev-Ran S. The association between severity  
40  
41 of depression and prescription opioid misuse among chronic pain patients with and without  
42  
43 anxiety: A cross-sectional study. *Journal of Affective Disorders*. 2018;235:293–302.  
44  
45
- 46 16. Goesling J, Henry MJ, Moser SE, Rastogi M, Hassett AL, Clauw DJ, et al. Symptoms of  
47  
48 Depression Are Associated With Opioid Use Regardless of Pain Severity and Physical  
49  
50 Functioning Among Treatment-Seeking Patients With Chronic Pain. *The Journal of Pain*.  
51  
52 2015;16(9):844–51.  
53  
54  
55  
56  
57  
58  
59  
60

- 1  
2  
3 17. Physical and Mental Health Condition Prevalence and Comorbidity among Fee-for-Service  
4 Medicare/Medicaid Enrollees [Internet]. Centers for Medicare & Medicaid Services. 2014.  
5 Available from: [https://www.cms.gov/Medicare-Medicaid-Coordination/Medicare-and-Medicaid-Coordination/Medicare-Medicaid-Coordination-Office/Downloads/Dual\\_Condition\\_Prevalence\\_Comorbidity\\_2014.pdf](https://www.cms.gov/Medicare-Medicaid-Coordination/Medicare-and-Medicaid-Coordination/Medicare-Medicaid-Coordination-Office/Downloads/Dual_Condition_Prevalence_Comorbidity_2014.pdf)  
6  
7  
8  
9  
10  
11  
12  
13  
14 18. Martin BC, Fan M-Y, Edlund MJ, Devries A, Braden JB, Sullivan MD. Long-Term Chronic  
15 Opioid Therapy Discontinuation Rates from the TROUP Study. *Journal of General Internal*  
16 *Medicine*. 2011;26(12):1450–7.  
17  
18  
19  
20  
21 19. Levels of Patient Access to Physical Therapist Services in the States [Internet]. American  
22 Physical Therapy Association; 2016. Available from:  
23 [https://www.apta.org/uploadedFiles/APTAorg/Advocacy/State/Issues/Direct\\_Access/DirectAccessbyState.pdf](https://www.apta.org/uploadedFiles/APTAorg/Advocacy/State/Issues/Direct_Access/DirectAccessbyState.pdf)  
24  
25  
26  
27  
28  
29  
30  
31 20. Feudtner C, Hexem KR, Shabbout M, Feinstein JA, Sochalski J, Silber JH. Prediction of  
32 Pediatric Death in the Year after Hospitalization: A Population-Level Retrospective Cohort  
33 Study. *Journal of Palliative Medicine*. 2009;12(2):160–9.  
34  
35  
36  
37  
38 21. Staples JA, Wang J, Mills B, Temkin N, Zaros MC, Jurkovich GJ, et al. The Application of  
39 the CRASH-CT Prognostic Model for Older Adults With Traumatic Brain Injury. *Journal of*  
40 *Head Trauma Rehabilitation*. 2016;31(5).  
41  
42  
43  
44  
45 22. 24982 - Jackknife and Bootstrap Analyses. 2010 [cited 2018Nov6]. Available from:  
46 <http://support.sas.com/kb/24/982.html>  
47  
48  
49  
50 23. Chou R, Huffman LH. Nonpharmacologic Therapies for Acute and Chronic Low Back Pain:  
51 A Review of the Evidence for an American Pain Society/American College of Physicians  
52 Clinical Practice Guideline. *Annals of Internal Medicine*. 2007Feb;147(7):492.  
53  
54  
55  
56  
57  
58  
59  
60

- 1  
2  
3 24. Cantrill SV, Brown MD, Carlisle RJ, Delaney KA, Hays DP, Nelson LS, et al. Clinical  
4 Policy: Critical Issues in the Prescribing of Opioids for Adult Patients in the Emergency  
5 Department. *Annals of Emergency Medicine*. 2012;60(4):499–525.  
6  
7  
8  
9  
10 25. Lebec MT, Jogodka CE. The Physical Therapist as a Musculoskeletal Specialist in the  
11 Emergency Department. *Journal of Orthopaedic & Sports Physical Therapy*. 2009;39(3):221–9.  
12  
13  
14 26. Lau PM-Y, Chow DH-K, Pope MH. Early physiotherapy intervention in an Accident and  
15 Emergency Department reduces pain and improves satisfaction for patients with acute low back  
16 pain: a randomised trial. *Australian Journal of Physiotherapy*. 2008;54(4):243–9.  
17  
18  
19  
20  
21 27. Lebec MT, Jogodka CE. The Physical Therapist as a Musculoskeletal Specialist in the  
22 Emergency Department. *Journal of Orthopaedic & Sports Physical Therapy*. 2009;39(3):221–9.  
23  
24  
25  
26 28. Fleming-McDonnell D, Czuppon S, Deusinger SS, Deusinger RH. Physical Therapy in the  
27 Emergency Department: Development of a Novel Practice Venue. *Physical Therapy*.  
28  
29 2010Jul;90(3):420–6.  
30  
31  
32  
33 29. Davis M, Lin L, Liu H, Sites B. Prescription Opioid Use among Adults with Mental Health  
34 Disorders in the United States. *The Journal of the American Board of Family Medicine*.  
35  
36 2017;30(4):407–17.  
37  
38  
39  
40 30. Sun E, Moshfegh J, Rishel CA, Cook CE, Goode AP, George SZ. Association of Early  
41 Physical Therapy With Long-term Opioid Use Among Opioid-Naive Patients With  
42 Musculoskeletal Pain. *JAMA Netw Open*. 2018;1(8):e185909.  
43  
44  
45  
46  
47 doi:10.1001/jamanetworkopen.2018.5909  
48  
49 31. Heyward J, Jones CM, Compton WM, Lin DH, Losby JL, Murimi IB, et al. Coverage of  
50 Nonpharmacologic Treatments for Low Back Pain Among US Public and Private Insurers.  
51  
52  
53  
54  
55  
56  
57  
58  
59  
60

- 1  
2  
3 32. Fritz JM, Childs JD, Wainner RS, Flynn TW. Primary care referral of patients with low back  
4 pain to physical therapy: impact on future health care utilization and costs. *Spine* .  
5  
6 2012Dec;37(25):2114–212.  
7  
8  
9  
10 33. Ojha HA, Wyrsta NJ, Davenport TE, Egan WE, Gellhorn AC. Timing of Physical Therapy  
11 Initiation for Nonsurgical Management of Musculoskeletal Disorders and Effects on Patient  
12 Outcomes: A Systematic Review. *Journal of Orthopaedic & Sports Physical Therapy*.  
13  
14 2016;46(2):56–70.  
15  
16  
17  
18 34. Thackeray A, Hess R, Dorius J, Brodke D, Fritz J. Relationship of Opioid Prescriptions to  
19 Physical Therapy Referral and Participation for Medicaid Patients with New-Onset Low Back  
20 Pain. *The Journal of the American Board of Family Medicine*. 2017;30(6):784–94.  
21  
22  
23  
24 35. Carey TS, Evans AT, Hadler NM, Lieberman G, Kalsbeek WD, Jackman AM, et al. Acute  
25 Severe Low Back Pain. *Spine*. 1996;21(3):339–44.  
26  
27  
28  
29 36. Carey TS, Garrett J, Jackman A, Mclaughlin C, Fryer J, Smucker DR. The Outcomes and  
30 Costs of Care for Acute Low Back Pain among Patients Seen by Primary Care Practitioners,  
31 Chiropractors, and Orthopedic Surgeons. *New England Journal of Medicine*.  
32  
33 1995May;333(14):913–7.  
34  
35  
36  
37 37. Houweling TA, Braga AV, Hausheer T, Vogelsang M, Peterson C, Humphreys BK. First-  
38 Contact Care With a Medical vs Chiropractic Provider After Consultation With a Swiss  
39 Telemedicine Provider: Comparison of Outcomes, Patient Satisfaction, and Health Care Costs in  
40 Spinal, Hip, and Shoulder Pain Patients. *Journal of Manipulative and Physiological Therapeutics*.  
41  
42  
43  
44  
45  
46  
47  
48  
49 2015;38(7):477–83.  
50  
51  
52  
53  
54  
55  
56  
57  
58  
59  
60

1  
2  
3 38. Walker BF, Muller R, Grant WD. Low Back Pain in Australian Adults. Health Provider  
4 Utilization and Care Seeking. Journal of Manipulative and Physiological Therapeutics.  
5  
6 2004;27(5):327–35.  
7  
8  
9  
10  
11  
12  
13  
14  
15  
16  
17  
18  
19  
20  
21  
22  
23  
24  
25  
26  
27  
28  
29  
30  
31  
32  
33  
34  
35  
36  
37  
38  
39  
40  
41  
42  
43  
44  
45  
46  
47  
48  
49  
50  
51  
52  
53  
54  
55  
56  
57  
58  
59  
60

For peer review only

**Table 1:** Patient characteristics

|                        | Entry-point provider |                        |                              |                            |                 |                              |                              |                            |                              |                           |
|------------------------|----------------------|------------------------|------------------------------|----------------------------|-----------------|------------------------------|------------------------------|----------------------------|------------------------------|---------------------------|
|                        | Total                | Conservative Therapist |                              |                            | Physician       |                              |                              |                            |                              |                           |
|                        |                      | Chiropractor           | Physical Therapist           | Acupunctur e               | Primary Care    | Orthopedic Surgeon           | Emergency Medicine           | MD Other                   | Rehab                        | Neurosurgeon              |
| Full Sample – N (%)    | 216,504 (100%)       | 50,014 (23.1%)         | 3,499 (1.6%)                 | 1,839 (0.8%)               | 114,782 (53.0%) | 9,335 (4.3)                  | 8,746 (4.0)                  | 4,422 (2.0)                | 3,246 (1.5)                  | 578 (0.3)                 |
| Age, year – mean (STD) | 48.1 (15.9)          | 45.7 (14.9)            | 47.0 (15.7)                  | 42.4 (10.6)                | 47.7 (15.4)     | 50.1 (16.4)                  | 50.1 (18.3)                  | 51.3 (15.3)                | 46.9 (15.0)                  | 52.2 (14.8)               |
| Gender – N (%)         |                      |                        |                              |                            |                 |                              |                              |                            |                              |                           |
| Female                 | 108,347 (50.1)       | 22,808 (45.6)          | 1,995 (57.1)                 | 972 (52.9)                 | 58,182 (50.7)   | 4,648 (49.8)                 | 4,560 (52.2)                 | 2,282 (51.6)               | 1,554 (47.9)                 | 245 (42.4)                |
| Male                   | 107,660 (49.8)       | 27,193 (54.4)          | >1,493 (>42.6) <sup>xx</sup> | >856 (>46.5) <sup>xx</sup> | 56,517 (49.2)   | 4,674 (50.1)                 | >4,175 (>47.7) <sup>xx</sup> | 2,140 (48.4)               | >1,681 (>51.8) <sup>xx</sup> | 333 (57.6)                |
| Race/ethnicity - N (%) |                      |                        |                              |                            |                 |                              |                              |                            |                              |                           |
| Black                  | 18,907 (8.7)         | 2,190 (4.4)            | 191 (5.5)                    | 45 (2.4)                   | 11,755 (10.2)   | 802 (8.6)                    | 1,192 (13.6)                 | 494 (11.2)                 | 208 (6.4)                    | 50 (8.7)                  |
| Hispanic               | 20,936 (9.7)         | 3,766 (7.5)            | 263 (7.5)                    | 224 (12.2)                 | 12,212 (10.6)   | 752 (8.1)                    | 860 (9.8)                    | 541 (12.2)                 | 293 (9.0)                    | 38 (6.6)                  |
| Asian                  | 9,344 (4.3)          | 1,636 (3.3)            | 224 (6.4)                    | 747 (40.6)                 | 4,885 (4.3)     | 354 (3.8)                    | 270 (3.1)                    | 194 (4.4)                  | 218 (6.7)                    | 15 (2.6)                  |
| White                  | 159,503 (73.7)       | 40,709 (81.4)          | 2,666 (76.2)                 | 732 (39.8)                 | 81,971 (71.4)   | 7,046 (75.5)                 | 6,115 (69.9)                 | 3,013 (68.1)               | 2,394 (73.8)                 | 449 (77.7)                |
| Unknown (Missing)      | 7,814 (3.6)          | 1,713 (3.4)            | 155 (4.4)                    | 91 (4.9)                   | 3,959 (3.4)     | 381 (4.1)                    | 309 (3.5)                    | 180 (4.1)                  | 133 (4.1)                    | 26 (4.5)                  |
| Insurance - N (%)      |                      |                        |                              |                            |                 |                              |                              |                            |                              |                           |
| Commercial             | 183,117 (84.7)       | 44,520 (89.0)          | 3,048 (87.1)                 | 1,827 (99.3)               | 99,842 (87.0)   | 7,696 (82.5)                 | 6,236 (71.3)                 | 3,601 (81.4)               | 2,891 (89.1)                 | 472 (81.7)                |
| Medicare Advantage     | 32,937 (15.2)        | 5,476 (11.0)           | >440 (>12.6) <sup>xx</sup>   | 12 (0.7)                   | 14,900 (13.0)   | > 1628 (>17.4) <sup>xx</sup> | >2,499 (>28.6) <sup>xx</sup> | >810 (>18.3) <sup>xx</sup> | >344 (>10.6) <sup>xx</sup>   | >95 (>16.4) <sup>xx</sup> |

**Table 1 Legend:** Age, gender, race/ethnicity, and insurance are all statistically significant at  $p < 0.0001$ . <sup>xx</sup>: Cell suppressed due to small N's with unknown gender or insurance in the corresponding column.

**Table 2:** Odds of early and long-term opioid use by initial provider

| <b>Initial Provider</b> | <b>Early use, OR (95% CI)</b> | <b>Long-term, OR (95% CI)</b> |
|-------------------------|-------------------------------|-------------------------------|
| PT vs PCP               | 0.15 (0.13,0.17)              | 0.27 (0.15,0.48)              |
| DC vs PCP               | 0.10 (0.09,0.10)              | 0.22 (0.18,0.26)              |
| Acupuncture vs PCP      | 0.09 (0.07,0.12)              | 0.07 (0.01,0.48)              |
| Ortho vs PCP            | 0.63 (0.60,0.67)              | 1.10 (0.92,1.30)              |
| Emerg Med vs PCP        | 2.66 (2.54,2.78)              | 0.92 (0.77,1.10)              |
| Neurosgn vs PCP         | 0.58 (0.47,0.71)              | 1.50 (0.88,2.58)              |
| MD other vs PCP         | 0.50 (0.46,0.54)              | 2.03 (1.70,2.41)              |
| Rehab vs PCP            | 0.54 (0.49,0.59)              | 1.78 (1.40,2.26)              |

**Table 2 Legend:** Primary care physician is the reference group; adjusted for race, gender, region, and insurance type. PT: physical therapy; PCP: primary care physician; DC: chiropractor; Ortho: orthopedic surgeon; Emerg Med: emergency medicine physician; Neurosgn: neurosurgeon; MD other: other physician; Rehab: rehab physician.



1  
2  
3 **Figure 1 Legend:** Initially, 8,797,787 patients with low back pain (LBP) were identified.  
4 Patients with an insufficient clean period (opioid use within the last 1 year), patients with a  
5 diagnosis of LBP that was not in the first position of their diagnosis, and LBP in only inpatient  
6 settings were excluded, reducing the number of patients to 3,840,842. Patients were excluded if  
7 they were not continuously enrolled in their insurance for 24 months before and after the initial  
8 LBP visit and if they were <18 years old, reducing the number of patients to 3,840,842. Patients  
9 with exclusionary conditions, LBP that was not limited to the low back, patients with back  
10 procedures in the 12 months prior to the index LBP visit, and patients with any opioid use in the  
11 12 months before the index visit were excluded, leaving 216,504 patients in our sample.  
12  
13  
14  
15  
16

17 **Figure 2 Legend:** Adjusted for age, gender, race, geographic region, insurance type, physical  
18 component of Elixhauser comorbidity index, and mental comorbidities.  
19  
20  
21  
22  
23  
24  
25  
26  
27  
28  
29  
30  
31  
32  
33  
34  
35  
36  
37  
38  
39  
40  
41  
42  
43  
44  
45  
46  
47  
48  
49  
50  
51  
52  
53  
54  
55  
56  
57  
58  
59  
60

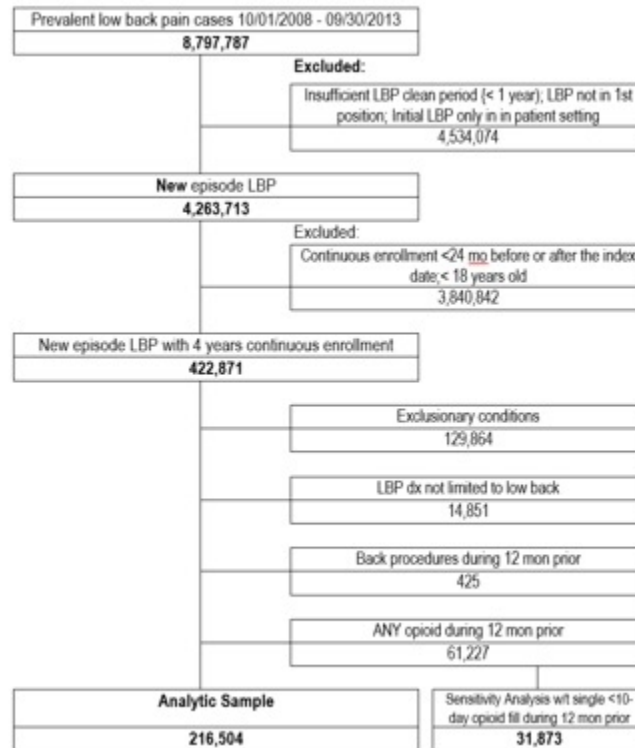

Initially, 8,797,787 patients with low back pain (LBP) were identified. Patients with an insufficient clean period (opioid use within the last 1 year), patients with a diagnosis of LBP that was not in the first position of their diagnosis, and LBP in only inpatient settings were excluded, reducing the number of patients to 3,840,842. Patients were excluded if they were not continuously enrolled in their insurance for 24 months before and after the initial LBP visit and if they were <18 years old, reducing the number of patients to 3,840,842. Patients with exclusionary conditions, LBP that was not limited to the low back, patients with back procedures in the 12 months prior to the index LBP visit, and patients with any opioid use in the 12 months before the index visit were excluded, leaving 216,504 patients in our sample.

120x134mm (72 x 72 DPI)

1  
2  
3  
4  
5  
6  
7  
8  
9  
10  
11  
12  
13  
14  
15  
16  
17  
18  
19  
20  
21  
22  
23  
24  
25  
26  
27  
28  
29  
30  
31  
32  
33  
34  
35  
36  
37  
38  
39  
40  
41  
42  
43  
44  
45  
46  
47  
48  
49  
50  
51  
52  
53  
54  
55  
56  
57  
58  
59  
60

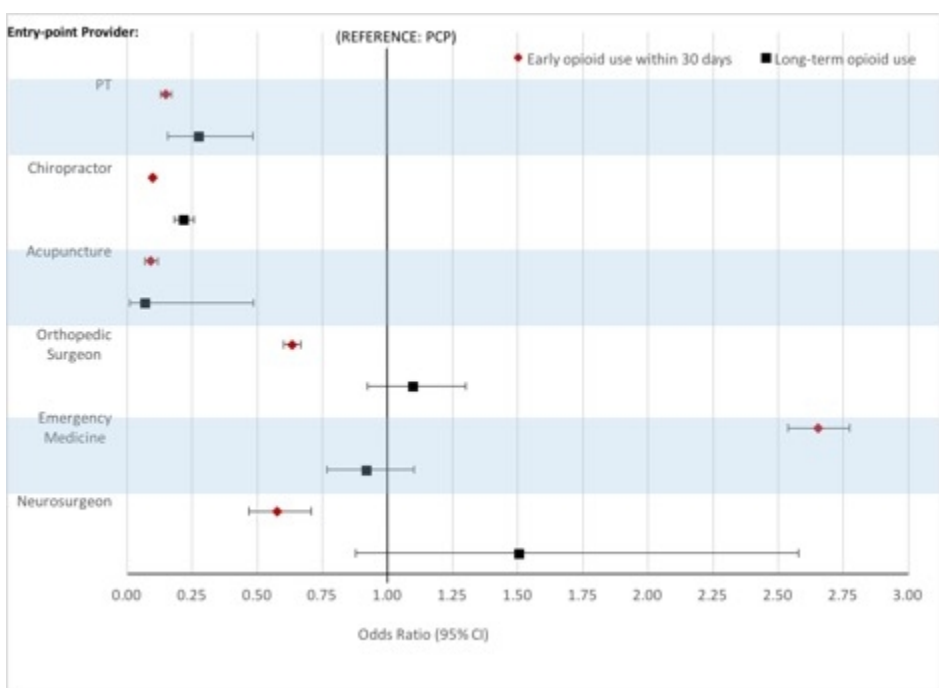

Adjusted for age, gender, race, geographic region, insurance type, physical component of Elixhauser comorbidity index, and mental comorbidities.

165x119mm (72 x 72 DPI)

**Appendix table 1:** Hosmer Lemeshow and c-statistics for all logistic models

| Outcome              | Hosmer Lemeshow chi-square | p-value | c-statistic |
|----------------------|----------------------------|---------|-------------|
| Any opioid use       | 19.029                     | 0.015   | 0.631       |
| early opioid use     | 15.395                     | 0.052   | 0.704       |
| long-term opioid use | 17.181                     | 0.028   | 0.753       |

For peer review only

**Appendix Table 2:** Bootstrapping, early opioid use

| <b>Initial Provider</b> | <b>n</b> | <b>OR (95% CI)<br/>bootstrapping</b> | <b>Early use, OR (95% CI)</b> |
|-------------------------|----------|--------------------------------------|-------------------------------|
| Physical therapy        | 200      | 0.15 (0.13, 0.17)                    | 0.15 (0.13,0.17)              |
| Chiropractor            | 200      | 0.10 (0.09, 0.10)                    | 0.10 (0.09,0.10)              |
| Acupuncture             | 200      | 0.09 (0.07, 0.12)                    | 0.09 (0.07,0.12)              |
| Orthopedics             | 200      | 0.63 (0.60, 0.67)                    | 0.63 (0.60,0.67)              |
| Emergency Medicine      | 200      | 2.66 (2.54, 2.78)                    | 2.66 (2.54,2.78)              |
| Neurosurgeon            | 200      | 0.57 (0.48, 0.69)                    | 0.58 (0.47,0.71)              |
| MD Other                | 200      | 0.50 (0.46, 0.54)                    | 0.50 (0.46,0.54)              |
| Radiology               | 200      | 0.70 (0.67, 0.73)                    | <b>0.70 (0.67,0.73)</b>       |
| Rehab                   | 200      | 0.54 (0.49, 0.59)                    | 0.54 (0.49,0.59)              |
| Other                   | 200      | 0.81 (0.76, 0.87)                    | <b>0.81 (0.76,0.87)</b>       |

**Appendix Table 3:** Bootstrapping, long-term opioid use

| Initial Provider      | N   | OR (95% CI)<br>bootstrapping | Long-term use, OR<br>(95% CI) |
|-----------------------|-----|------------------------------|-------------------------------|
| Physical therapy      | 200 | 0.26 (0.16, 0.50)            | 0.27 (0.15,0.48)              |
| Chiropractor          | 200 | 0.22 (0.18, 0.26)            | 0.22 (0.18,0.26)              |
| Acupuncture           | 200 |                              | 0.07 (0.01,0.48)              |
| Orthopedics           | 200 | 1.09 (0.92, 1.31)            | 1.10 (0.92,1.30)              |
| Emergency<br>Medicine | 200 | 0.92 (0.77, 1.11)            | 0.92 (0.77,1.10)              |
| Neurosurgeon          | 200 | 1.45 (0.88, 2.75)            | 1.50 (0.88,2.58)              |
| MD Other              | 200 | 2.02 (1.71, 2.41)            | 2.03 (1.70,2.41)              |
| Radiology             | 200 | 1.22 (1.08, 1.38)            | 1.22 (1.08,1.39)              |
| Rehab                 | 200 | 1.77 (1.42, 2.26)            | 1.78 (1.40,2.26)              |
| Other                 | 200 | 0.88 (0.69, 1.14)            | 0.88 (0.70,1.11)              |

**Appendix Table 3 Legend:** Sample size for acupuncture was too small to report for bootstrapping.

**Appendix table 4:** Multivariable odds of initial chiropractic care and initial PT versus initial PCP as a function of baseline covariates

| Covariate                               | Levels                    | PT                 | Chiro               |
|-----------------------------------------|---------------------------|--------------------|---------------------|
|                                         |                           | OR (95% CI)        | OR (95% CI)         |
| AGE                                     | 45-65 vs 18-44            | 1.02 (0.93,1.12)   | 0.81 (0.78, 0.83) * |
|                                         | 65-74 vs 18-44            | 1.15 (0.82,1.61)   | 0.77 (0.69, 0.86) * |
| GENDER                                  | Female vs Male            | 1.16 (1.06,1.27)   | 0.84 (0.82, 0.87) * |
| RACE                                    | Asian vs White            | 1.03 (0.86,1.23)   | 0.68 (0.64, 0.73) * |
|                                         | Black vs White            | 0.67 (0.56,0.82) * | 0.48 (0.46, 0.51) * |
|                                         | Hispanic vs White         | 0.67 (0.57,0.78) * | 0.64 (0.62, 0.67) * |
|                                         | Unknown vs White          | 0.94 (0.75,1.19)   | 0.84 (0.77, 0.90) * |
| REGION                                  | Midwest vs Northeast      | 2.11 (1.82,2.44) * | 0.87 (0.83, 0.91) * |
|                                         | South vs Northeast        | 0.88 (0.77,1.00)   | 0.86 (0.83, 0.89) * |
|                                         | West vs Northeast         | 2.11 (1.83,2.42) * | 1.00 (0.95, 1.04)   |
| Pregnancy                               |                           | 5.79 (4.92,6.83) * | 1.76 (1.62, 1.92) * |
| Accidents                               |                           | 0.74 (0.56,0.97) * | 0.36 (0.32, 0.40) * |
| Anxiety                                 |                           | 0.95 (0.82,1.11)   | 0.88 (0.84, 0.93) * |
| Bipolar                                 |                           | 0.56 (0.36,0.88) * | 0.93 (0.83, 1.05)   |
| Depression                              |                           | 0.92 (0.79,1.08)   | 0.96 (0.92, 1.01)   |
| Dementia                                |                           | -                  | 0.72 (0.43, 1.21)   |
| ADHD                                    |                           | 1.54 (1.17,2.04) * | 0.99 (0.90, 1.09)   |
| Alcohol use disorder                    |                           | 0.95 (0.60,1.49)   | 0.96 (0.83, 1.10)   |
| Substance use disorder                  |                           | 0.88 (0.47,1.62)   | 0.82 (0.68, 0.99) * |
| Chronic Pain,<br>fibromyalgia & Fatigue |                           | 1.44 (1.22,1.69) * | 0.90 (0.84, 0.95) * |
| Psychotic Disorder                      |                           | 1.00 (0.40,2.48)   | 1.14 (0.87, 1.48)   |
| Opioid use 13-24 months<br>back         |                           | 0.78 (0.69,0.87)   | 0.84 (0.81, 0.87) * |
| PT 1-24 months back                     |                           | 5.00 (4.45,5.62) * | 1.12 (1.05, 1.20) * |
| Chiro any 1-24 months<br>back           |                           | 1.45 (1.17,1.79) * | 6.92 (6.52, 7.35) * |
| Acupuncture any 1-24<br>months back     |                           | 1.80 (1.18,2.75) * | 1.39 (1.12, 1.73) * |
| LBP 13-24 months back                   |                           | 1.27 (0.98,1.65)   | 0.85 (0.77, 0.93) * |
| Elixhauser physical                     |                           | 0.91 (0.87,0.95) * | 0.91 (0.89, 0.92) * |
| PT State Access                         | Provisional vs<br>Limited | 1.21 (1.05,1.40) * | -                   |
|                                         | Unlimited vs Limited      | 1.67 (1.41,1.98) * | -                   |
| Year of index visit                     |                           | 1.06 (1.02,1.09) * | 1.02 (1.01, 1.03) * |

**Appendix Table 4 Legend:** Pregnancy: pregnancy in the 12 months prior to the initial LBP visit; Accidents: motor vehicle accidents in the 12 months prior to the initial LBP visit; \*p < .01. Reference group for age: ages 18-44; reference group for gender: male; reference group for race: white; reference group for region: Northeast; reference group for PT State Access: limited.

**Appendix table 5: Comorbidities**

|                                           |              | Total          | Early opioid use   | Long-term opioid use |
|-------------------------------------------|--------------|----------------|--------------------|----------------------|
| N                                         |              | 216,504        | OR (95% CI)        | OR (95% CI)          |
| ELIXHAUSER-<br>PHYSICAL                   | mean<br>(sd) | 1.04<br>(1.35) | 1.07 (1.06,1.08)*  | 1.24 (1.21,1.27)*    |
| Anxiety                                   | %            | 9.8            | 1.05 (1.01,1.09)*  | 1.46 (1.30,1.63)*    |
| Bipolar                                   | %            | 1.4            | 1.11 (1.01,1.21)*  | 1.41 (1.13,1.76)*    |
| Depression/Dep.<br>Disorder               | %            | 10.1           | 1.11 (1.07,1.15)*  | 1.55 (1.39,1.73)*    |
| Dementia                                  | %            | 0.7            | 0.80 (0.70,0.92)*  | 0.99 (0.73,1.36)     |
| ADHD                                      | %            | 1.7            | 0.87 (0.80,0.95)*  | 1.00 (0.75,1.32)     |
| Alcohol Use Disorder                      | %            | 1.1            | 1.08 (0.98,1.20)   | 1.28 (0.98,1.66)     |
| Drug Use Disorders                        | %            | 0.6            | 1.06 (0.93,1.22)   | 2.34 (1.76,3.10)*    |
| Fibromyalgia, Chronic<br>Pain and Fatigue | %            | 6.3            | 0.96 (0.92,1.01)   | 1.92 (1.71,2.16)*    |
| Post-Traumatic Stress                     | %            | 0.3            | 0.84 (0.69,1.03)   | 1.16 (0.77,1.77)     |
| Psychotic Disorders                       | %            | 0.6            | 0.86 (0.74,0.99) * | 0.76 (0.55,1.05)     |

**Appendix Table 5 Legend:** Mental health comorbidities were selected from the Centers for Medicare and Medicaid Services report on prevalence of mental health conditions.<sup>17</sup> \*p<0.01;



**Appendix table 6:** Propensity matching for initial Physical Therapy (PT) and initial chiropractor vs. initial Primary Care Physician (PCP)

| Outcome              |                                      | OR (95% CI)       |
|----------------------|--------------------------------------|-------------------|
| Early opioid use     | Initial PT vs. initial PCP           | 0.15 (0.12, 0.18) |
| Long-term opioid use | Initial PT vs. initial PCP           | 0.29 (0.12, 0.69) |
| Early opioid use     | Initial Chiropractor vs. initial PCP | 0.10 (0.09, 0.10) |
| Long-term opioid use | Initial Chiropractor vs. initial PCP | 0.21 (0.16, 0.27) |

For peer review only

STROBE Statement—Checklist of items that should be included in reports of *cohort studies*

|                              | Item No | Recommendation                                                                                                                                                                                    | Page No          |
|------------------------------|---------|---------------------------------------------------------------------------------------------------------------------------------------------------------------------------------------------------|------------------|
| <b>Title and abstract</b>    | 1       | (a) Indicate the study's design with a commonly used term in the title or the abstract                                                                                                            | 1,2              |
|                              |         | (b) Provide in the abstract an informative and balanced summary of what was done and what was found                                                                                               | 2                |
| <b>Introduction</b>          |         |                                                                                                                                                                                                   |                  |
| Background/rationale         | 2       | Explain the scientific background and rationale for the investigation being reported                                                                                                              | 3                |
| Objectives                   | 3       | State specific objectives, including any prespecified hypotheses                                                                                                                                  | 4                |
| <b>Methods</b>               |         |                                                                                                                                                                                                   |                  |
| Study design                 | 4       | Present key elements of study design early in the paper                                                                                                                                           | 4-7              |
| Setting                      | 5       | Describe the setting, locations, and relevant dates, including periods of recruitment, exposure, follow-up, and data collection                                                                   | 4-6              |
| Participants                 | 6       | (a) Give the eligibility criteria, and the sources and methods of selection of participants. Describe methods of follow-up                                                                        | 4-6              |
|                              |         | (b) For matched studies, give matching criteria and number of exposed and unexposed                                                                                                               | NA               |
| Variables                    | 7       | Clearly define all outcomes, exposures, predictors, potential confounders, and effect modifiers. Give diagnostic criteria, if applicable                                                          | 4-7              |
| Data sources/<br>measurement | 8*      | For each variable of interest, give sources of data and details of methods of assessment (measurement). Describe comparability of assessment methods if there is more than one group              | 4-7              |
| Bias                         | 9       | Describe any efforts to address potential sources of bias                                                                                                                                         | 6-7              |
| Study size                   | 10      | Explain how the study size was arrived at                                                                                                                                                         | 4-7,<br>figure 1 |
| Quantitative variables       | 11      | Explain how quantitative variables were handled in the analyses. If applicable, describe which groupings were chosen and why                                                                      | 4-7              |
| Statistical methods          | 12      | (a) Describe all statistical methods, including those used to control for confounding                                                                                                             | 4-7              |
|                              |         | (b) Describe any methods used to examine subgroups and interactions                                                                                                                               | NA               |
|                              |         | (c) Explain how missing data were addressed                                                                                                                                                       | NA               |
|                              |         | (d) If applicable, explain how loss to follow-up was addressed                                                                                                                                    | NA               |
|                              |         | (e) Describe any sensitivity analyses                                                                                                                                                             | NA               |
| <b>Results</b>               |         |                                                                                                                                                                                                   |                  |
| Participants                 | 13*     | (a) Report numbers of individuals at each stage of study—eg numbers potentially eligible, examined for eligibility, confirmed eligible, included in the study, completing follow-up, and analysed | 7, figure 1      |
|                              |         | (b) Give reasons for non-participation at each stage                                                                                                                                              | NA               |
|                              |         | (c) Consider use of a flow diagram                                                                                                                                                                | Figure 1         |
| Descriptive data             | 14*     | (a) Give characteristics of study participants (eg demographic, clinical, social) and information on exposures and potential confounders                                                          | 7-9,<br>table 1  |
|                              |         | (b) Indicate number of participants with missing data for each variable of interest                                                                                                               | NA               |
|                              |         | (c) Summarise follow-up time (eg, average and total amount)                                                                                                                                       | NA               |
| Outcome data                 | 15*     | Report numbers of outcome events or summary measures over time                                                                                                                                    | 7-9,<br>table 2  |

|    |                          |    |                                                                                                                                                                                                              |
|----|--------------------------|----|--------------------------------------------------------------------------------------------------------------------------------------------------------------------------------------------------------------|
| 1  |                          |    |                                                                                                                                                                                                              |
| 2  |                          |    |                                                                                                                                                                                                              |
| 3  | Main results             | 16 | (a) Give unadjusted estimates and, if applicable, confounder-adjusted estimates and their precision (eg, 95% confidence interval). Make clear which confounders were adjusted for and why they were included |
| 4  |                          |    |                                                                                                                                                                                                              |
| 5  |                          |    |                                                                                                                                                                                                              |
| 6  |                          |    | (b) Report category boundaries when continuous variables were categorized                                                                                                                                    |
| 7  |                          |    |                                                                                                                                                                                                              |
| 8  |                          |    | (c) If relevant, consider translating estimates of relative risk into absolute risk for a meaningful time period                                                                                             |
| 9  |                          |    |                                                                                                                                                                                                              |
| 10 | Other analyses           | 17 | Report other analyses done—eg analyses of subgroups and interactions, and sensitivity analyses                                                                                                               |
| 11 |                          |    |                                                                                                                                                                                                              |
| 12 |                          |    |                                                                                                                                                                                                              |
| 13 | <b>Discussion</b>        |    |                                                                                                                                                                                                              |
| 14 | Key results              | 18 | Summarise key results with reference to study objectives                                                                                                                                                     |
| 15 | Limitations              | 19 | Discuss limitations of the study, taking into account sources of potential bias or imprecision. Discuss both direction and magnitude of any potential bias                                                   |
| 16 |                          |    |                                                                                                                                                                                                              |
| 17 |                          |    |                                                                                                                                                                                                              |
| 18 | Interpretation           | 20 | Give a cautious overall interpretation of results considering objectives, limitations, multiplicity of analyses, results from similar studies, and other relevant evidence                                   |
| 19 |                          |    |                                                                                                                                                                                                              |
| 20 | Generalisability         | 21 | Discuss the generalisability (external validity) of the study results                                                                                                                                        |
| 21 |                          |    |                                                                                                                                                                                                              |
| 22 | <b>Other information</b> |    |                                                                                                                                                                                                              |
| 23 | Funding                  | 22 | Give the source of funding and the role of the funders for the present study and, if applicable, for the original study on which the present article is based                                                |
| 24 |                          |    |                                                                                                                                                                                                              |
| 25 |                          |    |                                                                                                                                                                                                              |
| 26 |                          |    |                                                                                                                                                                                                              |
| 27 |                          |    |                                                                                                                                                                                                              |
| 28 |                          |    |                                                                                                                                                                                                              |
| 29 |                          |    |                                                                                                                                                                                                              |
| 30 |                          |    |                                                                                                                                                                                                              |
| 31 |                          |    |                                                                                                                                                                                                              |
| 32 |                          |    |                                                                                                                                                                                                              |
| 33 |                          |    |                                                                                                                                                                                                              |
| 34 |                          |    |                                                                                                                                                                                                              |
| 35 |                          |    |                                                                                                                                                                                                              |
| 36 |                          |    |                                                                                                                                                                                                              |
| 37 |                          |    |                                                                                                                                                                                                              |
| 38 |                          |    |                                                                                                                                                                                                              |
| 39 |                          |    |                                                                                                                                                                                                              |
| 40 |                          |    |                                                                                                                                                                                                              |
| 41 |                          |    |                                                                                                                                                                                                              |
| 42 |                          |    |                                                                                                                                                                                                              |
| 43 |                          |    |                                                                                                                                                                                                              |
| 44 |                          |    |                                                                                                                                                                                                              |
| 45 |                          |    |                                                                                                                                                                                                              |
| 46 |                          |    |                                                                                                                                                                                                              |
| 47 |                          |    |                                                                                                                                                                                                              |
| 48 |                          |    |                                                                                                                                                                                                              |
| 49 |                          |    |                                                                                                                                                                                                              |
| 50 |                          |    |                                                                                                                                                                                                              |
| 51 |                          |    |                                                                                                                                                                                                              |
| 52 |                          |    |                                                                                                                                                                                                              |
| 53 |                          |    |                                                                                                                                                                                                              |
| 54 |                          |    |                                                                                                                                                                                                              |
| 55 |                          |    |                                                                                                                                                                                                              |
| 56 |                          |    |                                                                                                                                                                                                              |
| 57 |                          |    |                                                                                                                                                                                                              |
| 58 |                          |    |                                                                                                                                                                                                              |
| 59 |                          |    |                                                                                                                                                                                                              |
| 60 |                          |    |                                                                                                                                                                                                              |

\*Give information separately for exposed and unexposed groups.

**Note:** An Explanation and Elaboration article discusses each checklist item and gives methodological background and published examples of transparent reporting. The STROBE checklist is best used in conjunction with this article (freely available on the Web sites of PLoS Medicine at <http://www.plosmedicine.org/>, Annals of Internal Medicine at <http://www.annals.org/>, and Epidemiology at <http://www.epidem.com/>). Information on the STROBE Initiative is available at <http://www.strobe-statement.org>.

# BMJ Open

## An Observational Retrospective Study of the Association of Initial Health Care Provider for New-onset Low Back Pain with Early and Long-Term Opioid Use

|                                 |                                                                                                                                                                                                                                                                                                                                                                                                                                                                                                                                                                                                                                                                                                                                                                                                                                                                                                                                                                                                                                                                                   |
|---------------------------------|-----------------------------------------------------------------------------------------------------------------------------------------------------------------------------------------------------------------------------------------------------------------------------------------------------------------------------------------------------------------------------------------------------------------------------------------------------------------------------------------------------------------------------------------------------------------------------------------------------------------------------------------------------------------------------------------------------------------------------------------------------------------------------------------------------------------------------------------------------------------------------------------------------------------------------------------------------------------------------------------------------------------------------------------------------------------------------------|
| Journal:                        | <i>BMJ Open</i>                                                                                                                                                                                                                                                                                                                                                                                                                                                                                                                                                                                                                                                                                                                                                                                                                                                                                                                                                                                                                                                                   |
| Manuscript ID                   | bmjopen-2018-028633.R1                                                                                                                                                                                                                                                                                                                                                                                                                                                                                                                                                                                                                                                                                                                                                                                                                                                                                                                                                                                                                                                            |
| Article Type:                   | Original research                                                                                                                                                                                                                                                                                                                                                                                                                                                                                                                                                                                                                                                                                                                                                                                                                                                                                                                                                                                                                                                                 |
| Date Submitted by the Author:   | 04-Jun-2019                                                                                                                                                                                                                                                                                                                                                                                                                                                                                                                                                                                                                                                                                                                                                                                                                                                                                                                                                                                                                                                                       |
| Complete List of Authors:       | Kazis, Lewis; Boston University School of Public Health, Department of Health Law, Policy and Management<br>Ameli, Omid; OptumLabs; Boston University School of Public Health, Department of Health Law, Policy and Management<br>Rothendler, James; Boston University School of Public Health, Department of Health Law, Policy and Management<br>Garrity, Brigid; Boston University School of Public Health, Department of Health Law, Policy and Management<br>Cabral, Howard; Boston University School of Public Health, Department of Biostatistics<br>McDonough, Christine; University of Pittsburgh School of Health and Rehabilitation Sciences<br>Carey, Kathleen; Boston University School of Public Health, Department of Health Law, Policy and Management<br>Stein, Michael; Boston University School of Public Health, Department of Health Law, Policy and Management<br>Sanghavi, Darshak; OptumLabs<br>Elton, David; OptumHealth<br>Fritz, Julie; University of Utah, Physical Therapy and Athletic Training<br>Saper, Robert; Boston University Medical Campus, |
| <b>Primary Subject Heading</b>: | General practice / Family practice                                                                                                                                                                                                                                                                                                                                                                                                                                                                                                                                                                                                                                                                                                                                                                                                                                                                                                                                                                                                                                                |
| Secondary Subject Heading:      | Addiction                                                                                                                                                                                                                                                                                                                                                                                                                                                                                                                                                                                                                                                                                                                                                                                                                                                                                                                                                                                                                                                                         |
| Keywords:                       | Early and long-term opioid use, Opioid use, Back pain < ORTHOPAEDIC & TRAUMA SURGERY, PAIN MANAGEMENT, opioid                                                                                                                                                                                                                                                                                                                                                                                                                                                                                                                                                                                                                                                                                                                                                                                                                                                                                                                                                                     |
|                                 |                                                                                                                                                                                                                                                                                                                                                                                                                                                                                                                                                                                                                                                                                                                                                                                                                                                                                                                                                                                                                                                                                   |

SCHOLARONE™  
Manuscripts

An Observational Retrospective Study of the Association of Initial Health Care Provider for  
New-onset Low Back Pain with Early and Long-Term Opioid Use

Lewis E. Kazis, ScD<sup>1</sup>; Omid Ameli, MD, MPH.<sup>1,2,3</sup>; James Rothendler, MD<sup>1</sup>; Brigid Garrity, MS, MPH<sup>1</sup>; Howard Cabral, PhD<sup>4</sup>; Christine McDonough, PhD, PT<sup>5</sup>; Kathleen Carey, PhD<sup>1</sup>; Michael Stein, MD<sup>1</sup>; Darshak Sanghavi, MD<sup>3</sup>; David Elton, DC<sup>6</sup>; Julie Fritz, PhD, PT<sup>7</sup>; and Robert Saper, MD, MPH<sup>1,8</sup>.

Author Affiliations: 1. Boston University School of Public Health, Department of Health Law, Policy and Management, Boston, MA; 2. OptumLabs Visiting Scholar, OptumLabs, Cambridge, MA; 3. OptumLabs, Cambridge, MA; 4. Boston University School of Public Health, Department of Biostatistics, Boston, MA; 5. University of Pittsburgh School of Health and Rehabilitation Sciences, Pittsburgh, PA, 6. OptumHealth, Eden Prairie, MN 7. University of Utah, Department of Physical Therapy, Salt Lake City, UT. 8. Department of Family Medicine, Boston Medical Center, Boston, MA.

Corresponding Author: Lewis E. Kazis, Sc.D.  
Professor of Health Policy and Management  
Director, Health Outcomes Unit and Center for the Assessment of Pharmaceutical Practices (CAPP) (Est. 2000)  
Department of Health Law, Policy and Management  
Boston University School of Public Health  
715 Albany Street, Talbot 5 West (532)  
Boston MA. 02118  
Telephone: 617-358-2291  
[lek@bu.edu](mailto:lek@bu.edu)

**Word count:** Abstract: 292 words; Manuscript: 3,717 (including acknowledgements)

## Abstract

**Objective:** This study examined the association of initial provider treatment with early and long-term opioid use in a national sample of patients with new-onset low back pain (LBP).

**Design:** A retrospective cohort study of patients with new-onset LBP from 2008-2013.

**Setting:** The study evaluated outpatient and inpatient claims from patient visits, pharmacy claims, and inpatient and outpatient procedures with initial providers seen for new-onset LBP.

**Participants:** 216,504 individuals aged 18 or older across the United States who were diagnosed with new-onset LBP and were opioid-naïve were included. Participants had commercial or Medicare Advantage insurance.

**Exposures:** The primary independent variable is type of initial health care provider including physicians and conservative therapists (physical therapists, chiropractors, acupuncturists).

**Main Outcome Measures:** Early opioid use (within 30 days of the index visit) following new LBP visit and long-term opioid use (starting within 60 days of the index date and either 120 or more days' supply of opioids over 12 months, or 90 days or more supply of opioids and 10 or more opioid prescriptions over 12 months).

**Results:** Early use of opioids was 22%. Patients who received initial treatment from chiropractors or physical therapists had decreased odds of early and long-term opioid use compared to those who received initial treatment from primary care physicians (PCPs) [AOR (95% CI): 0.10 (0.09,0.10) and 0.15 (0.13,0.17) respectively]. Compared to PCP visits, initial chiropractic and physical therapy also were associated with decreased odds of long-term opioid use in a propensity-score matched sample [OR (95% CI): 0.21 (0.16, 0.27) and 0.29 (0.12, 0.69) respectively].

**Conclusions:** Initial visits to chiropractors or physical therapists is associated with substantially decreased early and long-term use of opioids. Incentivizing use of conservative therapists may be a strategy to reduce risks of short- and long-term opioid use.

### Strengths and Limitations of this Study

- This is a nationwide study comparing short and long term opioid use among patients with low back pain (LBP) who seek initial care from conservative therapists, physician specialists and primary care physicians.
- We go beyond investigating the odds of opioid use for a one-time LBP event, by examining associations with both early and long-term opioid use among patients with new-onset LBP.
- We provide a broader depiction of conservative therapy than prior studies, as we included chiropractors and acupuncturists, as well as other MD specialists.
- This study assesses the impact of state regulations of access to physical therapy on choice of initial provider.
- This is a claims based study; therefore, causation cannot be inferred, and different patient characteristics we could assess is limited.

## Introduction

Over the past decade, there has been an increase in opioid use in the United States, with over 12 million Americans reporting long-term opioid use or misuse in 2015.<sup>1-3</sup> The National Survey on Drug Use and Health reported over 42,000 prescription opioid-related deaths in 2016, with total estimated costs of prescription opioid use reaching \$78.5 billion.<sup>4,5</sup> One of the most common conditions for which opioids are prescribed is low back pain (LBP).<sup>2-4</sup> Several studies have reported that opioids are the most frequently prescribed medication for treatment of LBP,<sup>4,5</sup> and more than half of opioid users report having a history of back pain.<sup>6</sup> This frequency of opioid prescribing is particularly concerning given that LBP is one of the three most common conditions for which Americans seek medical care.<sup>2,7</sup>

Given the high prevalence of LBP, several treatment guidelines have been issued for treatment, and specifically discourage opioids to treat pain. The American College of Physicians (ACP) and the Centers for Disease Control (CDC) recommend non-pharmacologic treatments including exercise, physical therapy (PT), spinal manipulation, acupuncture, and massage.<sup>2,8</sup> These guidelines indicate that opioids should not be considered as a treatment option for LBP unless recommended treatments fail and if the benefits of their use outweigh the risk for the individual patient.<sup>2,8</sup> Prior to the release of these recommendations, physician visits for new-onset LBP were much more common than non-pharmacologic therapies like chiropractic care, PT, and acupuncture.<sup>8-11</sup>

Several studies have attempted to elucidate the predictors of opioid use among patients with LBP. Comparisons of the treatment patterns of primary care physicians (PCPs) and conservative therapists (defined as chiropractors, physical therapists, acupuncturists) suggest that the use of conservative therapies for LBP may decrease the likelihood of opioid use.<sup>9</sup> Despite



1  
2  
3 these findings, there has been little research comparing early and long-term opioid use among  
4 patients seeking initial care from various providers, including primary care physicians,  
5  
6 chiropractors, physical therapists, and acupuncturists as well as patients seeing orthopedic  
7  
8 surgeons, neurosurgeons and emergency physicians.<sup>12-14</sup> The purpose of this study is to examine  
9  
10 the association of type of initial provider with subsequent early and long-term opioid use in a  
11  
12 national sample of patients with new-onset LBP whose treatment could reasonably be managed  
13  
14 by non-pharmacologic therapy.  
15  
16  
17  
18

## 19 **Methods**

### 20 *Study Sample*

21  
22 We conducted a retrospective study of patients seen by a health care provider for new-  
23  
24 onset LBP management and who were opioid-naïve at the time of the initial visit (Boston  
25  
26 Medical Center IRB approval number: H-36499). We used de-identified administrative claims  
27  
28 data from the OptumLabs Data Warehouse (OLDW), which includes medical and pharmacy  
29  
30 claims, laboratory results, and enrollment records for commercial and Medicare Advantage  
31  
32 (MA) enrollees. The database contains longitudinal health information on enrollees and patients,  
33  
34 representing a diverse mixture of ages, ethnicities and geographical regions across the United  
35  
36 States.  
37  
38  
39  
40  
41

42 The various health plans individuals were enrolled in all provide comprehensive  
43  
44 insurance coverage for physician, hospital, and prescription drug services.  
45  
46

47 The index episode of LBP was identified using claims from 2008-2013 with additional  
48  
49 claims data covering 2006-2015 to ascertain pre-index visit opioid use and low back conditions  
50  
51 and to allow a follow-up period. Patients needed to be continuously enrolled for at least 24  
52  
53 months both before and following the index date (total 48 months) with both medical and  
54  
55  
56  
57  
58  
59  
60

1  
2  
3 pharmacy claims data available during that period. The study sample included adults aged 18  
4  
5 years or older with a new outpatient diagnosis of LBP who had commercial or Medicare  
6  
7 Advantage insurance.  
8  
9

10 To qualify, LBP diagnosis appeared in the first location on a patient's index date  
11 insurance claim. New-onset LBP was defined as no diagnosis of LBP or back procedures,  
12 including spinal surgery, spinal injections, and spinal nerve stimulators during the 12-month  
13 period prior to the index event (Figure 1). Given the heterogeneity of claims data in a  
14 commercial insured population, we constructed our inclusion and exclusion criteria with the  
15 specific purpose of maximizing the likelihood that our analytic sample comprised our target  
16 population.  
17  
18  
19  
20  
21  
22  
23  
24  
25

#### 26 *Exclusion Criteria*

27  
28 Patients were excluded if they had 1) a prescription for opioids in the 12 months prior to  
29 the index event (see Appendix 1a for a list of opioids included), 2) a diagnosis of neoplasia in  
30 this 12-month period or within a 3-month period after the index LBP event, or 3) a LBP-related  
31 diagnoses that would typically not be amenable to conservative therapy in the 3 months on or  
32 following the index date (See Appendix 1b-d for ICD-9 and CPT Codes for Inclusion/Exclusion  
33 Critiera). Each patient was only included in the study once.  
34  
35  
36  
37  
38  
39  
40  
41

#### 42 *Dependent variables*

43  
44 Early opioid use was defined as an opioid fill within 30 days of the index visit. Long-  
45 term use was defined as an initial opioid fill within 60 days of the index date and either 120 or  
46 more days' supply of opioids over 12 months, or 90 days or more supply of opioids and 10 or  
47 more opioid prescriptions over 12 months. This definition relied on previous literature.<sup>6,15</sup>  
48  
49  
50  
51  
52

#### 53 *Independent variables*

### *Patient characteristics*

We identified patient characteristics and comorbidities using ICD-9 codes for the claims data in the two years prior to the index event. Characteristics included age, sex, race/ethnicity, insurance (commercial or Medicare Advantage), and state of residence (which was mapped to one of 4 United States census regions: Northeast, South, Midwest and West). Race and ethnicity are defined as Black, Hispanic, Asian, or White (Table 1). Ethnicity was assigned by an external vendor based on a structured, rule-based system that combines analysis of first names, middle names, surnames, and surname prefixes and suffixes, with geographic reference files. Values were then categorized to comply with data de-identification requirements. Physical comorbidities were assessed using a modification of the Elixhauser index<sup>15</sup> in which mental health conditions were excluded. Other comorbidities, listed in Table 2, included 8 mental health conditions and a condition comprising chronic pain, fibromyalgia and fatigue. The latter conditions were included based on prior studies that have reported an association between such conditions and opioid use<sup>16,17</sup> and their specifications were based on the Centers for Medicare and Medicaid Services Chronic Conditions Data Warehouse.<sup>18</sup>

Based on the index claim date of patients with an eligible LBP diagnosis, initial providers were characterized as physical therapist, chiropractor, acupuncturist, primary care physician, orthopedic surgeon, emergency medicine physician, neurosurgeon, radiologists, other non-physicians (physician assistant or nurse practitioners), or physical medicine and rehabilitation physician according to provider specialty and procedure codes. If a patient saw both a physician and a conservative therapist on the index date, the initial provider was assumed to be the physician, although this was notably a small number of individuals (n=262).

1  
2  
3 Patient access to PT in every state was classified as either ‘limited’, ‘provisional’, or  
4  
5 ‘unrestricted’, based on the three levels of patient access outlined by the American Physical  
6  
7  
8  
9  
10  
11  
12  
13  
14  
15  
16  
17  
18  
19  
20  
21  
22  
23  
24  
25  
26  
27  
28  
29  
30  
31  
32  
33  
34  
35  
36  
37  
38  
39  
40  
41  
42  
43  
44  
45  
46  
47  
48  
49  
50  
51  
52  
53  
54  
55  
56  
57  
58  
59  
60

19 To access PT for their initial LBP visit in limited access states, patients must have a prior relevant medical diagnosis, a recent diagnosis from a physician or other specified clinician, and/or a prior physician referral to PT. States with provisional access permitted patients to see physical therapists with some provisions that vary by state. Restrictions in provisional access states include time and/or visit limits and physician referrals for specific interventions. Patients in unrestricted states do not face these restrictions when seeking initial care from a physical therapist. There were six states with limited access to PT, 26 states with provisional access, and 18 states with unrestricted access to PT.<sup>19</sup>

### *Statistical Analyses*

The main analyses included multivariable logistic regressions with early opioid use and long-term opioid use as outcomes and entry-point provider as the main independent variable. The reference group for these comparisons was patients who visited PCP first for the LBP. All models were adjusted for age, sex, race/ethnicity, geographic region, insurance type, the Elixhauser physical index as a continuous count of physical co-morbidities and, individually, mental health comorbidities.

As a supplemental alternative to adjusting for baseline confounding through regression adjustment, we invoked two-to-one propensity score matching (2 PCP: 1 physical therapist or 2 PCP: 1 chiropractor) without replacement to achieve baseline covariate balance among patients who initially saw chiropractor first, saw a physical therapist first or who saw PCP first.<sup>20,21</sup> The propensity scores were calculated as predicted probabilities of chiropractor first and a physical therapist first as opposed to PCP first as a function of the following matching variables: age, sex,

1  
2  
3 race/ethnicity, baseline comorbidities, geographic region, calendar year of the index visit, copay,  
4 deductible, plan type, history of pregnancy within 12 months, history of vehicular accidents  
5 within 12 months, history of opioid use within the year prior to the opioid free period, LBP  
6 diagnoses in the 13-24 months prior to the index visit, and prior PT visits. The propensity score  
7 for PT also considered the state PT access category, but the chiropractor propensity score did  
8 not. We examined the covariate balance in the matched samples through the standardized mean  
9 differences of each covariate. Finally, we applied a logistic model using the matched sample to  
10 assess the association between chiropractor compared to PCP as the initial provider seen and PT  
11 compared to PCP as the initial provider seen with the outcomes early term opioid use and  
12 separately long-term opioid use (binary variables). The caliper for propensity matching was set  
13 to 0.001 for both PT and chiropractor models.  
14  
15  
16  
17  
18  
19  
20  
21  
22  
23  
24  
25  
26  
27

28 In stage one of the propensity analysis, multivariable odds of initial chiropractic care and  
29 initial physical therapist versus initial PCP as a function of baseline covariates were measured.  
30 Covariates measured include age, gender, race, geographic region, all mental and physical  
31 comorbidities included in the previous models, pregnancy and motor vehicle accidents in the 12  
32 months prior to the LBP visit, opioid use in the 13-24 months prior to the LBP index visit, PT,  
33 chiropractic care, and acupuncture in the 24 months prior to the LBP visit, and year of index  
34 visit. PT state access was only used for the PT vs PCP propensity analysis.  
35  
36  
37  
38  
39  
40  
41  
42  
43  
44

45 For all logistic models, we calculated adjusted odds ratios with 95% Wald confidence  
46 intervals. We also evaluated overall model fit, model discrimination (C statistic) and calibration  
47 (Hosmer Lemeshow test) for all logistic models (Appendix 2). While the Hosmer Lemeshow  
48 models were significant, this was likely due to the large sample sizes used for this study. The  
49 differences between the observed and expected values within the decile groups was relatively  
50  
51  
52  
53  
54  
55  
56  
57  
58  
59  
60

1  
2  
3 small suggesting credible calibration of the models and statistical significance due to the large  
4 sample sizes.<sup>22,23</sup> We further validated the covariate-adjusted ORs of early use and long-term use  
5 as a function of initial provider using the bootstrap method.<sup>24</sup> The resampling rate was 200 with a  
6 two-third/one-third sampling ratio. The bootstrapped estimates were then used to construct  
7 means and 95% confidence intervals for the ORs.  
8  
9  
10  
11  
12  
13

### 14 *Patient and Public Involvement*

15 No patient involvement.  
16  
17  
18

### 19 **Results**

20  
21 A total of 8,797,787 patients had a visit with a provider for LBP during the study period,  
22 and 216,504 met all inclusion/exclusion criteria (Figure 1). More than half the patients initially  
23 saw a PCP (n=114,782, 53.0%), and the most frequent initial conservative provider seen was  
24 chiropractor (50,041, 23.1%) followed by physical therapist 3,499 (1.6%) and acupuncturist  
25 1,839 (0.8%). Patient demographics by initial provider are shown in Table 1. Most patients had  
26 commercial insurance (183,117, 84.7%); the remainder had Medicare Advantage coverage. Of  
27 patients with an acupuncturist as the initial provider type, nearly all (99.3%) had commercial  
28 insurance. For all other initial provider types, 87-89% of patients had commercial insurance.  
29  
30 Approximately 18% of patients received an opioid fill within 3 days of the initial LBP visit, 22%  
31 received such a fill within the first 30 days and 1.2% met criteria for long-term use. 18% of  
32 patients received fast-acting opioids, while 17.4% received prescription NSAIDs and we  
33 postulate that many more likely received non-prescription NSAIDs, as they are available over  
34 the counter. The choice of initial provider varied by state PT access category. For example, in  
35 limited access states, 55.2% of initial providers were PCP, 0.9% were physical therapists, and  
36 25.7% were chiropractors. In provisional access states, the rates were 51.7% for PCPs, 1.6% for  
37  
38  
39  
40  
41  
42  
43  
44  
45  
46  
47  
48  
49  
50  
51  
52  
53  
54  
55  
56  
57  
58  
59  
60

1  
2  
3 physical therapists, and 23.2% for chiropractors, and in unrestricted access states, the rates were  
4  
5 55.8% for PCPs, 2.6% for physical therapists, and 22.6% for chiropractors.  
6  
7

8 Initial provider was associated with short and long-term opioid use outcomes in the  
9  
10 adjusted multivariate models (Table 2). Compared to seeing a PCP as initial provider, patients  
11  
12 who first saw conservative therapists (chiropractor, acupuncturists and physical therapists) all  
13  
14 had significantly decreased odds of both early and long-term opioid use. For early opioid use,  
15  
16 patients initially visiting chiropractors had 90% decreased odds [95% CI: (0.09,0.10)] while  
17  
18 those visiting an acupuncturists had 91% decreased odds [95% CI: (0.07,0.12)] and those  
19  
20 visiting physical therapists had 85% decreased odds [95% CI: (0.13,0.17)]. Chiropractors,  
21  
22 acupuncturists and physical therapists all had major decreased odds of long term opioid use  
23  
24 compared to those who initially saw PCPs (0.22, 95% CI: (0.18,0.26); 0.07, 95% CI: (0.01,0.48);  
25  
26 0.27, 95% CI: (0.15,0.48) respectively). Compared to PCPs, orthopedic surgeons, neurosurgeons  
27  
28 and rehab physicians as initial providers decreased patients' odds of early opioid use (0.63, 95%  
29  
30 CI: (0.60,0.67); 0.58, 95% CI: (0.47,0.71); 0.54, 95% CI: (0.49,0.59), respectively), while  
31  
32 patients seeing emergency physicians initially had significantly increased odds of early opioid  
33  
34 use (2.66, 95% CI: (2.54,2.78)). However, compared to PCP as first provider, odds for long-  
35  
36 term opioid use were no longer significantly different for orthopedic surgeons, neurosurgeons,  
37  
38 and emergency physicians (1.10, 95% CI: (0.92,1.30); 1.50, 95% CI: (0.88,2.58); 0.92, 95% CI:  
39  
40 (0.77,1.10), respectively), but were significantly increased for rehab physicians (1.78, 95% CI:  
41  
42 (1.40,2.26)). (Table 2). The estimates reported using bootstrapping methods indicated little or no  
43  
44 differences with the actual results (Appendix 3 and 4).  
45  
46  
47  
48  
49  
50  
51  
52  
53  
54  
55  
56  
57  
58  
59  
60

1  
2  
3 Patients with anxiety, bipolar disorder, and depression had significantly increased odds of  
4 long-term opioid use, as did those diagnosed with drug use disorders and fibromyalgia/chronic  
5 pain/fatigue (Table 2).  
6  
7

8  
9  
10 Propensity-score matched odds of long-term opioid use were significantly lower for  
11 chiropractic care first compared to PCP first and for PT first as compared to PCP first with odds  
12 ratios consistent with findings in our primary covariate-adjusted logistic models (detailed results  
13 presented in Appendix 5).  
14  
15

16  
17  
18 *Multivariable odds of initial chiropractic care and initial PT versus initial PCP as a*  
19 *function of baseline covariates*  
20  
21

22  
23  
24 Patients in states with provisional access to PT had 1.21 (95% CI: 1.05, 1.40) times the  
25 odds of seeing a physical therapist initially while patients in states with unrestricted access to PT  
26 had 1.67 (95% CI: 1.40, 1.98) times the odds of seeing a physical therapist initially all compared  
27 to patients in states with limited PT access (Appendix 6).  
28  
29  
30

## 31 32 33 **Discussion**

34  
35 Initial treatment from conservative therapists in those with LBP was associated with a  
36 marked decrease in the odds of short and long term opioid use. To our knowledge, this is one of  
37 the first national studies to compare short and long term opioid use among patients with LBP  
38 who receive care from conservative therapists, physician specialists and PCPs. Although the  
39 impact of unmeasured confounders cannot be ruled out in this retrospective observational cohort  
40 study, the findings warrant careful consideration.  
41  
42  
43  
44  
45  
46  
47  
48

49 Several factors may help explain the apparent protective effect of conservative therapists.  
50 Since non-physicians are unable to prescribe opioids, patients seeking conservative therapy do  
51 not receive opioid prescriptions at the index visit, and subsequent visits to an MD would be  
52  
53  
54  
55  
56  
57  
58  
59



1  
2  
3 required to obtain such prescriptions. There may be selection bias among patients choosing to  
4 seek initial treatment from conservative therapists, and such biases could be related to  
5 educational level or preferences which may also result in decreased desire for those patients to  
6 use opioids. Additionally, the conservative therapy provided may result in decreased pain and  
7 improved back-related function so that patients do not need or seek opioid medications. A growing  
8 body of evidence suggest that spinal manipulation, massage, acupuncture, and superficial heat are effective for  
9 reducing acute low back pain intensity and improving function.<sup>23,25</sup> The conservative therapists studied in  
10 this analysis can incorporate one or more of these approaches: physical therapist (manipulation,  
11 massage, heat), chiropractor (manipulation, massage, heat), and acupuncturist (acupuncture,  
12 massage).<sup>23</sup> Therefore and importantly, early engagement of conservative therapists may  
13 decrease initial opioid prescriptions in association with MD visits by providing the opportunity  
14 to incorporate evidence-based non-pharmacological interventions.

15  
16  
17  
18  
19  
20  
21  
22  
23  
24  
25  
26  
27  
28  
29  
30  
31 Notably, state access to PT had a considerable association with choice of initial provider.  
32 Compared to states with limited access to PT, patients in states with unrestricted and provisional  
33 access had 67% and 21% higher odds of visiting physical therapists initially, respectively. Given  
34 that initial PT is associated with significant reductions in early and long-term opioid use, these  
35 observations are potentially important.

36  
37  
38  
39  
40  
41  
42  
43 The discrepancy between early and long-term use among PCPs and physicians specialists  
44 is also interesting. While patients who initially see orthopedic surgeons, neurosurgeons,  
45 rehabilitation physicians, and other physicians have significantly lower odds of early opioid use  
46 compared to PCPs, patients who initially see these physicians have similar or increased odds of  
47 long-term opioid use compared to PCPs. While we do not have a measure of pain severity, we  
48 hypothesize that physician specialists are trying to avoid prescribing opioids at the index visit,  
49  
50  
51  
52  
53  
54  
55  
56  
57  
58  
59  
60

1  
2  
3 but if patients return at follow-up due to persistent pain, physicians are likely to prescribe  
4  
5 opioids.  
6

### 7 *Comparisons to prior studies*

8  
9  
10 Our results are consistent with prior studies showing high rates of opioid prescription fills  
11 for patients with LBP who were seen by emergency department physicians.<sup>3,26</sup> While there are  
12 very few studies suggesting that PT and chiropractic care are used in emergency departments in  
13 the United States<sup>27</sup>, other countries have successfully introduced physical therapists into  
14 emergency departments to treat patients with LBP.<sup>28-30</sup>

15  
16  
17  
18  
19  
20  
21  
22 Certain comorbidities were also associated with increased odds of opioid use. Patients  
23 with fibromyalgia, chronic pain, and fatigue and those with certain psychiatric conditions,  
24 including anxiety, bipolar disorder, and depression had greater odds of long-term opioid use than  
25 patients without these disorders. This is consistent with recent evidence suggesting that adults  
26 with mental health conditions account for half of opioid prescriptions in the United States.<sup>31</sup>

27  
28  
29  
30  
31  
32  
33 A recent study by Frogner et al. also found that LBP patients who saw physical therapists  
34 initially had lower opioid use, although this study only focused on six states.<sup>13</sup> Another recent  
35 study by Hayward et al. evaluated the use of non-opioid treatments from various providers,  
36 including physical therapists and physicians, however this was a descriptive study across only 16  
37 states.<sup>32</sup> Our study examines the association of conservative therapy on opioid use with a  
38 sample that is national in scope. We also provide a broader depiction of conservative therapy, as  
39 we included chiropractors and acupuncturists in addition to physical therapists, as well as other  
40 MD specialists. Importantly, we find that conservative therapists other than physical therapists,  
41 including chiropractors and acupuncturists, when seen first after a new episode of LBP are  
42 apparently protective of early and long term use of opioids when compared with PCP's. Finally,  
43  
44  
45  
46  
47  
48  
49  
50  
51  
52  
53  
54  
55  
56  
57  
58  
59  
60

1  
2  
3 we go beyond investigating the odds of opioid use for a one-time LBP event, by examining  
4  
5 associations with both early and long-term opioid use among patients with new-onset LBP, using  
6  
7 rigorous definitions of recent onset.  
8  
9

10 Fritz et al. found that early PT was associated with decreased opioid prescriptions<sup>33</sup>, and a  
11  
12 review by Ojha et al. noted that early PT as treatment for musculoskeletal disorders was  
13  
14 associated with decreased frequency of opioid prescriptions, although this was based on a limited  
15  
16 number of outcomes.<sup>34</sup> Thackerary et al. also suggested that the odds of receiving an opioid  
17  
18 prescription among Medicaid beneficiaries were reduced for those who had a PT consult, as  
19  
20 compared to those who did not.<sup>35</sup> While these studies did not measure the odds of opioid use  
21  
22 among patients who initially saw physical therapists compared to other initial providers, our  
23  
24 results are consistent with previously published reports that PT is associated with lower odds of  
25  
26 opioid use.  
27  
28  
29

### 30 *Limitations*

31  
32  
33 There are several limitations to this study. Analysis was conducted using claims data,  
34  
35 limiting our generalizability beyond commercial and Medicare Advantage enrolled patients.  
36  
37 However, the sample is national in scope and provides a range of sociodemographic and clinical  
38  
39 characteristics. The observational nature of the study and the use of claims data limited our  
40  
41 ability to eliminate the influence of unmeasured confounders. In particular, confounding by  
42  
43 indication may bias our results. Patients who seek early treatment with non-pharmacologic  
44  
45 practitioners may be more likely to have mild back pain that does not require more aggressive  
46  
47 treatment such as opioids, compared to individuals with more severe back pain who may be more  
48  
49 likely to see practitioners able to prescribe opioids. Studies have suggested that those with more  
50  
51 severe LBP are more likely to receive opioids,<sup>36</sup> and if patients with less severe pain were more  
52  
53  
54  
55  
56  
57  
58  
59  
60

1  
2  
3 likely to choose conservative therapists rather than physicians, this could contribute to  
4  
5 overestimation of the protective effect of conservative therapy on opioid use. Several prior  
6  
7 studies have shown comparable baseline pain scores for those who choose conservative  
8  
9 therapists compared to those who choose to see physicians initially, however it is important to  
10  
11 note that these studies had different patient populations than this study as they were conducted  
12  
13 either only in one state or in countries other than the United States.<sup>36-40</sup> Other unmeasured  
14  
15 confounders may include patient preferences and behavioral characteristics. For example, those  
16  
17 who chose conservative therapists as initial providers for LBP may have preferences to  
18  
19 avoid pharmacological and/or opioid therapy. Therefore, while the associations between initial  
20  
21 health care providers for LBP and subsequent opioid therapy found in our analyses have  
22  
23 potentially important implications, one cannot infer causality due to the observational  
24  
25 retrospective nature of the study.  
26  
27  
28  
29

### 30 31 *Policy Implications and Future Research*

32  
33 In conclusion, our results suggest that use of conservative therapists as initial providers  
34  
35 for new-onset LBP are associated with lower odds of early and long-term use of opioids  
36  
37 compared with PCPs. Further research in other settings and prospective pragmatic trials will be  
38  
39 useful to confirm our findings and to better understand other factors that influence choice of  
40  
41 initial providers for LBP. Future research should include personal factors such as preferences  
42  
43 related to opioid use, and medical, non-medical and specialists as initial providers. Factors  
44  
45 related to health plan benefit design such as out-of-pocket costs for treatment alternatives (e.g.  
46  
47 PT and chiropractor visits, opioids) and impact of gatekeeper requirements on care patterns  
48  
49 should be investigated.  
50  
51  
52

### 53 54 *Contributorship statement*

1  
2  
3 Drs. Kazis, Rothendler, Ameli, Cabral, McDonough, Carey, and Saper were responsible for  
4 project design and conceptualization. Drs. Ameli and Cabral were responsible for data analysis.  
5 Drs. Kazis, Rothendler, Ameli, Cabral, McDonough, Carey, Saper, and Stein and Ms. Garrity  
6 were responsible for writing of the manuscript. Drs. Sanghavi, Elton, and Fritz provided critical  
7 feedback during the analysis and writing of the manuscript. All authors were involved in the  
8 editing and review of the manuscript.  
9  
10

### 11 *Competing interests*

12  
13 Drs. Ameli, Sanghavi, and Elton work for OptumLabs but do not have any competing interests to  
14 report.  
15

### 16 *Funding*

17  
18 This project was funded by the American Physical Therapy Association, OptumLabs, and  
19 UnitedHealthCare.  
20

### 21 *Data sharing statement*

22  
23 Certain data from OptumLabs Data Warehouse may be available upon request.  
24  
25

### 26 *Acknowledgements*

27  
28 We thank members of the OptumLabs steering committee for their feedback and advice on this  
29 project. We thank in particular: Henry Henk, PhD, OptumLabs and Pamela C. Hansen, PhD,  
30 OptumLabs. This research was supported by UnitedHealthcare and the American Physical  
31 Therapy Association. Neither institution had editorial control or influence for the final content  
32 of this paper.  
33  
34  
35  
36  
37  
38  
39  
40  
41  
42  
43  
44  
45  
46  
47  
48  
49  
50  
51  
52  
53  
54  
55  
56  
57  
58  
59  
60

## References

1. Hughes A, Williams M, Lipari R, Bose J. Prescription drug use and misuse in the United States: results from the 2015 National Survey on Drug Use and Health. 2016 September.
2. Dowell D, Haegerich TM, Chou R. CDC Guideline for Prescribing Opioids for Chronic Pain—United States, 2016. *Jama*. 2016;315(15):1624.
3. Shmagel A, Ngo L, Ensrud K, Foley R. Prescription Medication Use Among Community-Based U.S. Adults With Chronic Low Back Pain: A Cross-Sectional Population Based Study. *The Journal of Pain*. 2018;19(10):1104–12.
4. Opioid Overdose [Internet]. Centers for Disease Control and Prevention. Centers for Disease Control and Prevention; 2017 [cited 2018Nov6]. Available from: <https://www.cdc.gov/drugoverdose/data/statedeaths.html>
5. Gore M, Tai K-S, Sadosky A, Leslie D, Stacey BR. Use and Costs of Prescription Medications and Alternative Treatments in Patients with Osteoarthritis and Chronic Low Back Pain in Community-Based Settings. *Pain Practice*. 2012May;12(7):550–60.
6. Boudreau D, Von Korff M, Rutter CM, Saunders C, Ray GT, Sullivan M, et al. Trends in De-facto Long-term Opioid Therapy for Chronic NonCancer Pain. *Pharmacoepidemiology and Drug Safety*. 2009Dec;18(12): 1166–75.
7. Licciardone JC. The epidemiology and medical management of low back pain during ambulatory medical care visits in the United States. *Osteopathic Medicine and Primary Care*. 2008;2(1):11.
8. Qaseem A, Wilt TJ, McLean RM, Forciea MA. Noninvasive Treatments for Acute, Subacute, and Chronic Low Back Pain. *Annals of Internal Medicine*. 2017;166(7).

- 1  
2  
3 9. Fritz JM, Kim J, Dorius J. Importance of the type of provider seen to begin health care for a  
4 new episode low back pain: associations with future utilization and costs. *Journal of Evaluation*  
5  
6 in *Clinical Practice*. 2015;22(2):247–52.  
7  
8
- 9  
10 10. Cherkin DC, Deyo RA, Wheeler K, Ciol MA. Physician Variation in Diagnostic Testing for  
11  
12 Low Back Pain. Who You See Is What You Get. *Arthritis & Rheumatism*. 1994;37(1):15–22.  
13
- 14 11. Webster BS, Cifuentes M, Verma S, Pransky G. Geographic variation in opioid prescribing  
15  
16 for acute, work-related, low back pain and associated factors: A multilevel analysis. *American*  
17  
18 *Journal of Industrial Medicine*. 2009;52(2):162–71.  
19
- 20 12. Fritz JM, Cleland JA, Speckman M, Brennan GP, Hunter SJ. Physical Therapy for Acute  
21  
22 Low Back Pain. *Spine*. 2008;33(16):1800–5.  
23
- 24 13. Frogner BK, Harwood K, Andrilla CHA, Schwartz M, Pines JM. Physical Therapy as the  
25  
26 First Point of Care to Treat Low Back Pain: An Instrumental Variables Approach to Estimate  
27  
28 Impact on Opioid Prescription, Health Care Utilization, and Costs. *Health Services Research*.  
29  
30 2018;  
31  
32
- 33 14. Martin BC, Fan M-Y, Edlund MJ, Devries A, Braden JB, Sullivan MD. Long-Term Chronic  
34  
35 Opioid Therapy Discontinuation Rates from the TROUP Study. *Journal of General Internal*  
36  
37 *Medicine*. 2011;26(12):1450–7.  
38  
39
- 40 15. Elixhauser A, Steiner C, Harris DR, Coffey RM. Comorbidity Measures for Use with  
41  
42 Administrative Data. *Medical Care*. 1998;36(1):8–27.  
43  
44
- 45 16. Feingold D, Brill S, Goor-Aryeh I, Delayahu Y, Lev-Ran S. The association between severity  
46  
47 of depression and prescription opioid misuse among chronic pain patients with and without  
48  
49 anxiety: A cross-sectional study. *Journal of Affective Disorders*. 2018;235:293–302.  
50  
51  
52  
53  
54  
55  
56  
57  
58  
59

- 1  
2  
3 17. Goesling J, Henry MJ, Moser SE, Rastogi M, Hassett AL, Clauw DJ, et al. Symptoms of  
4 Depression Are Associated With Opioid Use Regardless of Pain Severity and Physical  
5 Functioning Among Treatment-Seeking Patients With Chronic Pain. *The Journal of Pain*.  
6 2015;16(9):844–51.  
7  
8 18. Chronic Condition Data Warehouse. Centers for Medicare and Medicaid Services.  
9  
10 <https://www.ccwdata.org/web/guest/condition-categories>  
11  
12 19. Levels of Patient Access to Physical Therapist Services in the States [Internet]. American  
13 Physical Therapy Association; 2016. Available from:  
14  
15 [https://www.apta.org/uploadedFiles/APTAorg/Advocacy/State/Issues/Direct\\_Access/DirectAcce](https://www.apta.org/uploadedFiles/APTAorg/Advocacy/State/Issues/Direct_Access/DirectAccessbyState.pdf)  
16 [ssbyState.pdf](https://www.apta.org/uploadedFiles/APTAorg/Advocacy/State/Issues/Direct_Access/DirectAccessbyState.pdf)  
17  
18 20. Stuart, E. A., King, G., Imai, K., & Ho, D. E. (2011). MatchIt: nonparametric preprocessing  
19 for parametric causal inference. *Journal of Statistical Software*, 42(8).  
20  
21 21. Dehejia, R. H., & Wahba, S. (2002). Propensity score-matching methods for  
22 nonexperimental causal studies. *Review of Economics and statistics*, 84(1), 151-161.  
23  
24 22. Feudtner C, Hexem KR, Shabbout M, Feinstein JA, Sochalski J, Silber JH. Prediction of  
25 Pediatric Death in the Year after Hospitalization: A Population-Level Retrospective Cohort  
26 Study. *Journal of Palliative Medicine*. 2009;12(2):160–9.  
27  
28 23. Chou R, Deyo R, Friedly J, Skelly A, Hashimoto R, Weimer M, et al. Nonpharmacologic  
29 Therapies for Low Back Pain: A Systematic Review for an American College of Physicians  
30 Clinical Practice Guideline. *Ann Intern Med*. 2017 Apr 4;166(7):493-505. doi: 10.7326/M16-  
31 2459. Epub 2017 Feb 14. Review. PMID: 28192793  
32  
33 24. Jackknife and Bootstrap Analyses. 2010 [cited 2018Nov6]. Available from:  
34 <http://support.sas.com/kb/24/982.html>  
35  
36  
37  
38  
39  
40  
41  
42  
43  
44  
45  
46  
47  
48  
49  
50  
51  
52  
53  
54  
55  
56  
57  
58  
59  
60



- 1  
2  
3 25. Chou R, Huffman LH. Nonpharmacologic Therapies for Acute and Chronic Low Back Pain:  
4 A Review of the Evidence for an American Pain Society/American College of Physicians  
5  
6 A Review of the Evidence for an American Pain Society/American College of Physicians  
7  
8 Clinical Practice Guideline. *Annals of Internal Medicine*. 2007Feb;147(7):492.  
9
- 10 26. Cantrill SV, Brown MD, Carlisle RJ, Delaney KA, Hays DP, Nelson LS, et al. Clinical  
11  
12 Policy: Critical Issues in the Prescribing of Opioids for Adult Patients in the Emergency  
13  
14 Department. *Annals of Emergency Medicine*. 2012;60(4):499–525.  
15
- 16 27. Lebec MT, Jogodka CE. The Physical Therapist as a Musculoskeletal Specialist in the  
17  
18 Emergency Department. *Journal of Orthopaedic & Sports Physical Therapy*. 2009;39(3):221–9.  
19
- 20 28. Lau PM-Y, Chow DH-K, Pope MH. Early physiotherapy intervention in an Accident and  
21  
22 Emergency Department reduces pain and improves satisfaction for patients with acute low back  
23  
24 pain: a randomised trial. *Australian Journal of Physiotherapy*. 2008;54(4):243–9.  
25
- 26 29. Lebec MT, Jogodka CE. The Physical Therapist as a Musculoskeletal Specialist in the  
27  
28 Emergency Department. *Journal of Orthopaedic & Sports Physical Therapy*. 2009;39(3):221–9.  
29
- 30 30. Fleming-McDonnell D, Czuppon S, Deusinger SS, Deusinger RH. Physical Therapy in the  
31  
32 Emergency Department: Development of a Novel Practice Venue. *Physical Therapy*.  
33  
34 2010Jul;90(3):420–6.  
35
- 36 31. Davis M, Lin L, Liu H, Sites B. Prescription Opioid Use among Adults with Mental Health  
37  
38 Disorders in the United States. *The Journal of the American Board of Family Medicine*.  
39  
40 2017;30(4):407–17.  
41
- 42 32. Heyward J, Jones CM, Compton WM, Lin DH, Losby JL, Murimi IB, et al. Coverage of  
43  
44 Nonpharmacologic Treatments for Low Back Pain Among US Public and Private Insurers.  
45  
46  
47  
48  
49  
50  
51  
52  
53  
54  
55  
56  
57  
58  
59  
60

- 1  
2  
3 33. Fritz JM, Childs JD, Wainner RS, Flynn TW. Primary care referral of patients with low back  
4 pain to physical therapy: impact on future health care utilization and costs. *Spine* .  
5  
6 2012Dec;37(25):2114–212.  
7  
8  
9  
10 34. Ojha HA, Wyrsta NJ, Davenport TE, Egan WE, Gellhorn AC. Timing of Physical Therapy  
11 Initiation for Nonsurgical Management of Musculoskeletal Disorders and Effects on Patient  
12 Outcomes: A Systematic Review. *Journal of Orthopaedic & Sports Physical Therapy*.  
13  
14 2016;46(2):56–70.  
15  
16  
17  
18 35. Thackeray A, Hess R, Dorius J, Brodke D, Fritz J. Relationship of Opioid Prescriptions to  
19 Physical Therapy Referral and Participation for Medicaid Patients with New-Onset Low Back  
20 Pain. *The Journal of the American Board of Family Medicine*. 2017;30(6):784–94.  
21  
22  
23  
24  
25 36. Larson, MJ, Adams, RS, Ritter, GA, Linton, A, Williams, TV, Saadoun, M, et al.  
26 Associations of Early Treatments for Low-Back Pain with Military Readiness Outcomes. *The*  
27  
28 *Journal of Alternative and Complementary Medicine* 2018 24:7, 666-676  
29  
30  
31  
32  
33 37. Carey TS, Evans AT, Hadler NM, Lieberman G, Kalsbeek WD, Jackman AM, et al. Acute  
34 Severe Low Back Pain. *Spine*. 1996;21(3):339–44.  
35  
36  
37  
38 38. Carey TS, Garrett J, Jackman A, McLaughlin C, Fryer J, Smucker DR. The Outcomes and  
39 Costs of Care for Acute Low Back Pain among Patients Seen by Primary Care Practitioners,  
40 Chiropractors, and Orthopedic Surgeons. *New England Journal of Medicine*.  
41  
42 1995May;333(14):913–7.  
43  
44  
45  
46 39. Houweling TA, Braga AV, Hausheer T, Vogelsang M, Peterson C, Humphreys BK. First-  
47 Contact Care With a Medical vs Chiropractic Provider After Consultation With a Swiss  
48  
49  
50  
51  
52  
53  
54  
55  
56  
57  
58  
59  
60

1  
2  
3 Spinal, Hip, and Shoulder Pain Patients. Journal of Manipulative and Physiological Therapeutics.  
4  
5 2015;38(7):477–83.  
6

7  
8 40. Walker BF, Muller R, Grant WD. Low Back Pain in Australian Adults. Health Provider  
9  
10 Utilization and Care Seeking. Journal of Manipulative and Physiological Therapeutics.  
11  
12 2004;27(5):327–35.  
13  
14  
15  
16  
17  
18  
19  
20  
21  
22  
23  
24  
25  
26  
27  
28  
29  
30  
31  
32  
33  
34  
35  
36  
37  
38  
39  
40  
41  
42  
43  
44  
45  
46  
47  
48  
49  
50  
51  
52  
53  
54  
55  
56  
57  
58  
59  
60

For peer review only

**Table 1:** Patient characteristics

|                        | Entry-point provider |                        |                              |                            |                |                              |                              |                            |                              |                           |
|------------------------|----------------------|------------------------|------------------------------|----------------------------|----------------|------------------------------|------------------------------|----------------------------|------------------------------|---------------------------|
|                        | Total                | Conservative Therapist |                              |                            | Physician      |                              |                              |                            |                              |                           |
|                        |                      | Chiropractor           | Physical Therapist           | Acupuncture                | Primary Care   | Orthopedic Surgeon           | Emergency Medicine           | MD Other                   | Rehab                        | Neurosurgeon              |
| Full Sample – N (%)    | 216,504 (100)        | 50,014 (23.1)          | 3,499 (1.6)                  | 1,839 (0.8)                | 114,782 (53.0) | 9,335 (4.3)                  | 8,746 (4.0)                  | 4,422 (2.0)                | 3,246 (1.5)                  | 578 (0.3)                 |
| Age, year – mean (STD) | 48.1 (15.9)          | 45.7 (14.9)            | 47.0 (15.7)                  | 42.4 (10.6)                | 47.7 (15.4)    | 50.1 (16.4)                  | 50.1 (18.3)                  | 51.3 (15.3)                | 46.9 (15.0)                  | 52.2 (14.8)               |
| Gender – N (%)         |                      |                        |                              |                            |                |                              |                              |                            |                              |                           |
| Female                 | 108,347 (50.1)       | 22,808 (45.6)          | 1,995 (57.1)                 | 972 (52.9)                 | 58,182 (50.7)  | 4,648 (49.8)                 | 4,560 (52.2)                 | 2,282 (51.6)               | 1,554 (47.9)                 | 245 (42.4)                |
| Male                   | 107,660 (49.8)       | 27,193 (54.4)          | >1,493 (>42.6) <sup>xx</sup> | >856 (>46.5) <sup>xx</sup> | 56,517 (49.2)  | 4,674 (50.1)                 | >4,175 (>47.7) <sup>xx</sup> | 2,140 (48.4)               | >1,681 (>51.8) <sup>xx</sup> | 333 (57.6)                |
| Race/ethnicity - N (%) |                      |                        |                              |                            |                |                              |                              |                            |                              |                           |
| Black                  | 18,907 (8.7)         | 2,190 (4.4)            | 191 (5.5)                    | 45 (2.4)                   | 11,755 (10.2)  | 802 (8.6)                    | 1,192 (13.6)                 | 494 (11.2)                 | 208 (6.4)                    | 50 (8.7)                  |
| Hispanic               | 20,936 (9.7)         | 3,766 (7.5)            | 263 (7.5)                    | 224 (12.2)                 | 12,212 (10.6)  | 752 (8.1)                    | 860 (9.8)                    | 541 (12.2)                 | 293 (9.0)                    | 38 (6.6)                  |
| Asian                  | 9,344 (4.3)          | 1,636 (3.3)            | 224 (6.4)                    | 747 (40.6)                 | 4,885 (4.3)    | 354 (3.8)                    | 270 (3.1)                    | 194 (4.4)                  | 218 (6.7)                    | 15 (2.6)                  |
| White                  | 159,503 (73.7)       | 40,709 (81.4)          | 2,666 (76.2)                 | 732 (39.8)                 | 81,971 (71.4)  | 7,046 (75.5)                 | 6,115 (69.9)                 | 3,013 (68.1)               | 2,394 (73.8)                 | 449 (77.7)                |
| Unknown (Missing)      | 7,814 (3.6)          | 1,713 (3.4)            | 155 (4.4)                    | 91 (4.9)                   | 3,959 (3.4)    | 381 (4.1)                    | 309 (3.5)                    | 180 (4.1)                  | 133 (4.1)                    | 26 (4.5)                  |
| Insurance - N (%)      |                      |                        |                              |                            |                |                              |                              |                            |                              |                           |
| Commercial             | 183,117 (84.7)       | 44,520 (89.0)          | 3,048 (87.1)                 | 1,827 (99.3)               | 99,842 (87.0)  | 7,696 (82.5)                 | 6,236 (71.3)                 | 3,601 (81.4)               | 2,891 (89.1)                 | 472 (81.7)                |
| Medicare Advantage     | 32,937 (15.2)        | 5,476 (11.0)           | >440 (>12.6) <sup>xx</sup>   | 12 (0.7)                   | 14,900 (13.0)  | > 1628 (>17.4) <sup>xx</sup> | >2,499 (>28.6) <sup>xx</sup> | >810 (>18.3) <sup>xx</sup> | >344 (>10.6) <sup>xx</sup>   | >95 (>16.4) <sup>xx</sup> |

**Table 1 Legend:** Age, gender, race/ethnicity, and insurance are all statistically significant at  $p < 0.0001$ . <sup>xx</sup>: Cell suppressed due to small N's with unknown gender or insurance in the corresponding column. Two additional initial type of providers – other non-MD (eg. Physician assistants, advance practice nurses) and radiologist - were included in the analyses but not reported in this table. Outcomes with a sample size  $< 11$  are not shown due to small sample size. There were a small number of individuals with unknown gender and insurance type, and if we provided exact n's, readers may be able to infer the unknown n's which would be problematic since we cannot disclose  $n < 11$  for purposes of confidentiality of the data. For example, in Table 1 under Male PT, >1493 means that there was an unknown gender row or column with  $n < 11$ . Therefore, the number of male PT first individuals is between 1,493 and 1,504.

**Table 2:** Odds of early and long-term opioid use by initial provider

|                  |                                          | Early use, OR (95% CI) | Long-term, OR (95% CI) |
|------------------|------------------------------------------|------------------------|------------------------|
| Initial provider | PT (N=3,499)                             | 0.15 (0.13,0.17)       | 0.27 (0.15,0.48)       |
|                  | DC (N=50,014)                            | 0.10 (0.09,0.10)       | 0.22 (0.18,0.26)       |
|                  | Acupuncture (N=1,839)                    | 0.09 (0.07,0.12)       | 0.07 (0.01,0.48)       |
|                  | Ortho (N=9,335)                          | 0.63 (0.60,0.67)       | 1.10 (0.92,1.30)       |
|                  | Emerg Med (N=8,746)                      | 2.66 (2.54,2.78)       | 0.92 (0.77,1.10)       |
|                  | Neurosgn (N=578)                         | 0.58 (0.47,0.71)       | 1.50 (0.88,2.58)       |
|                  | MD other (N=4,422)                       | 0.50 (0.46,0.54)       | 2.03 (1.70,2.41)       |
|                  | Rehab (N=3,246)                          | 0.54 (0.49,0.59)       | 1.78 (1.40,2.26)       |
| Age              | 45-64 vs 18-44                           | 1.07 (1.05,1.10)       | 1.32 (1.19,1.46)       |
|                  | 65-74 vs 18-44                           | 0.89 (0.82,0.97)       | 0.79 (0.54,1.15)       |
|                  | 75+ vs 18-44                             | 0.80 (0.72,0.89)       | 0.67 (0.45,1.00)       |
| Sex              | Female vs. male                          | 0.83 (0.81,0.85)       | 0.82 (0.76,0.89)       |
| Race             | Asian vs White                           | 0.49 (0.46,0.52)       | 0.29 (0.20,0.42)       |
|                  | Black vs White                           | 0.90 (0.87,0.94)       | 0.87 (0.76,0.99)       |
|                  | Hispanic vs White                        | 0.79 (0.76,0.82)       | 0.69 (0.59,0.81)       |
|                  | Unknown vs White                         | 0.84 (0.79,0.89)       | 0.65 (0.51,0.83)       |
| Region           | Midwest vs Northeast                     | 0.78 (0.75,0.81)       | 0.74 (0.64,0.87)       |
|                  | South vs Northeast                       | 1.11 (1.08,1.14)       | 1.22 (1.11,1.34)       |
|                  | West vs Northeast                        | 1.01 (0.97,1.04)       | 1.17 (1.02,1.34)       |
| Insurance type   | Medicare <65 y/o vs commercial insurance | 0.98 (0.89,1.08)       | 3.77 (3.19,4.46)       |
|                  | Medicare ≥65 y/o vs commercial insurance | 0.98 (0.89,1.08)       | 2.24 (1.54,3.26)       |
| Comorbidities    | Anxiety                                  | 1.05 (1.01,1.09)       | 1.46 (1.30,1.63)       |
|                  | Bipolar disorder                         | 1.11 (1.01,1.21)       | 1.41 (1.13,1.76)       |
|                  | Depression                               | 1.11 (1.07,1.15)       | 1.55 (1.39,1.73)       |
|                  | Dementia                                 | 0.80 (0.70,0.92)       | 0.99 (0.73,1.36)       |
|                  | ADHD                                     | 0.87 (0.80,0.95)       | 1.00 (0.75,1.32)       |
|                  | Alcohol use disorder                     | 1.08 (0.98,1.20)       | 1.28 (0.98,1.66)       |
|                  | Substance use disorder                   | 1.06 (0.93,1.22)       | 2.34 (1.76,3.10)       |
|                  | Fibromyalgia/Chronic Pain/Fatigue        | 0.96 (0.92,1.01)       | 1.92 (1.71,2.16)       |
|                  | PTSD                                     | 0.84 (0.69,1.03)       | 1.16 (0.77,1.77)       |
|                  | Psychotic disorder                       | 0.86 (0.74,0.99)       | 0.76 (0.55,1.05)       |
|                  | Elixhauser physical                      | 1.07 (1.06,1.08)       | 1.24 (1.21,1.27)       |

**Table 2 Legend:** The following variables were all included in the regression: Age, gender, race/ethnicity, insurance, Elixhauser, which included physical comorbidities and mental health comorbidities. Primary care physician is the reference group (N=114,782); adjusted for race/ethnicity, gender, region, and insurance type. PT: physical therapy; PCP: primary care physician; DC: chiropractor; Ortho: orthopedic surgeon; Emerg Med: emergency medicine physician; Neurosgn: neurosurgeon; MD other: other physician; Rehab: rehab physician. \*p<0.01. Two additional initial providers – other non-MD (eg. Physician assistants, advance practice nurses) and radiologist - were included in the analyses but not reported in this table.

1  
2  
3 **Figure 1 Legend:** Initially, 8,797,787 patients with low back pain (LBP) were identified.  
4 Patients with an insufficient clean period (LBP within the last 1 year), patients with a diagnosis  
5 of LBP that was not in the first position of their diagnosis, and LBP in only inpatient settings  
6 were excluded, reducing the number of patients to 4,263,713. Patients were excluded if they  
7 were not continuously enrolled in their insurance for 24 months before and after the initial LBP  
8 visit and if they were <18 years old, reducing the number of patients to 422,871. Patients with  
9 exclusionary conditions, LBP that was not limited to the low back, patients with back procedures  
10 in the 12 months prior to the index LBP visit, and patients with any opioid use in the 12 months  
11 before the index visit were excluded, leaving 216,504 patients in our sample.  
12  
13  
14  
15  
16  
17  
18  
19  
20  
21  
22  
23  
24  
25  
26  
27  
28  
29  
30  
31  
32  
33  
34  
35  
36  
37  
38  
39  
40  
41  
42  
43  
44  
45  
46  
47  
48  
49  
50  
51  
52  
53  
54  
55  
56  
57  
58  
59  
60

**Figure 1:** Inclusion and exclusion criteria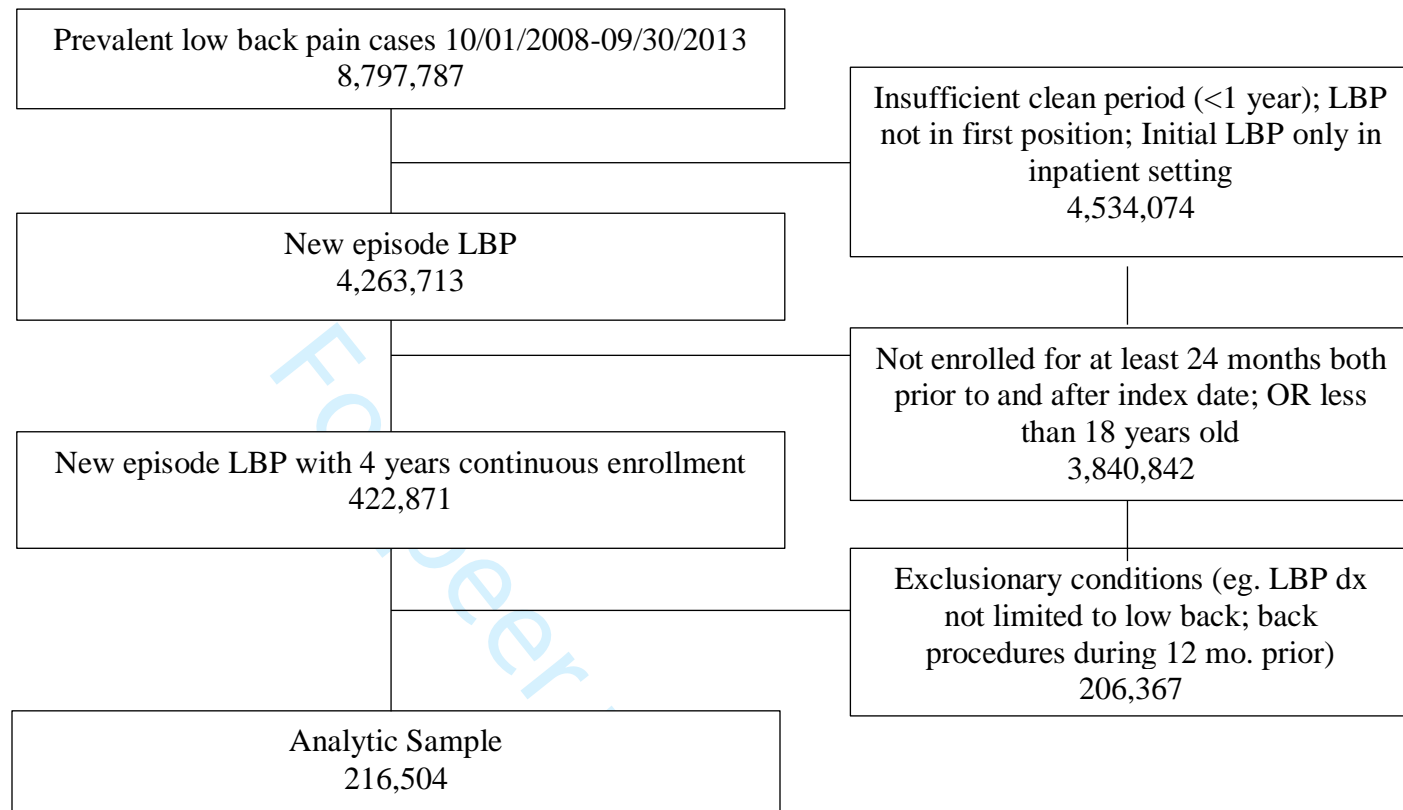

## Appendix 1: ICD-9 and CPT Codes for Inclusion/Exclusion Criteria

### Appendix 1a: Drugs classified as opioids

The following drugs were identified as opioids with over 10,000 NDC codes: Buprenorphine, Codeine, Dihydrocodeine, Fentanyl LA, Fentanyl SA, Hydrocodone LA, Hydrocodone SA, Hydromorphone LA, Hydromorphone SA, Levomethadyl, Levorphanol, Meperidine, Methadone, Morphine LA, Morphine SA, Naltrexone, Opium, Oxycodone LA, Oxycodone SA, Oxymorphone LA, Oxymorphone SA, Pentazocine, Propoxyphene, Tapentadol LA, Tapentadol SA, Tramadol LA, Tramadol SA.

For peer review only



## Appendix 1b: ICD-9 LBP Diagnoses Inclusion/Exclusion Criteria

| ICD-9 code | Description                                                                               | Include as location-specific LBP index diagnosis | Exclusion if in clean period prior to index diagnosis | Exclusion if on index date or within 3 months afterwards |
|------------|-------------------------------------------------------------------------------------------|--------------------------------------------------|-------------------------------------------------------|----------------------------------------------------------|
| 353.4      | Lumbosacral root lesions, not elsewhere classified                                        | x                                                | X                                                     |                                                          |
| 721.3      | Lumbosacral spondylosis without myelopathy                                                | x                                                | X                                                     |                                                          |
| 721.42     | Spondylosis with myelopathy, lumbar region                                                | x                                                | X                                                     |                                                          |
| 722.1      | Displacement of thoracic or lumbar intervertebral disc without myelopathy                 | x                                                | X                                                     |                                                          |
| 722.32     | Schmorl nodes, lumbar region                                                              | x                                                | X                                                     |                                                          |
| 722.51     | Degeneration of thoracic or lumbar intervertebral disc                                    | x                                                | X                                                     |                                                          |
| 722.52     | Degeneration of lumbar or lumbosacral intervertebral disc                                 | x                                                | X                                                     |                                                          |
| 722.93     | Other and unspecified disc disorder of lumbar region                                      | x                                                | X                                                     |                                                          |
| 724.2      | Lumbago                                                                                   | x                                                | X                                                     |                                                          |
| 724.3      | Sciatica                                                                                  | x                                                | X                                                     |                                                          |
| 724.4      | Thoracic or lumbosacral neuritis or radiculitis, unspecified                              | x                                                | X                                                     |                                                          |
| 724.5      | Unspecified backache                                                                      | x                                                | X                                                     |                                                          |
| 724.6      | Disorders of sacrum                                                                       | x                                                | X                                                     |                                                          |
| 739.3      | Non-allopathic lesion of lumbar region, not elsewhere classified                          | x                                                | X                                                     |                                                          |
| 739.4      | Non-allopathic lesion of sacral region, not elsewhere classified                          | x                                                | X                                                     |                                                          |
| 846.0      | Sprain and strain of lumbosacral (joint) (ligament)                                       | x                                                | X                                                     |                                                          |
| 846.1      | Sprain and strain of sacroiliac (ligament)                                                | x                                                | X                                                     |                                                          |
| 846.2      | Sprain and strain of sacrospinatus (ligament)                                             | x                                                | X                                                     |                                                          |
| 846.3      | Sprain and strain of sacrotuberous (ligament)                                             | x                                                | X                                                     |                                                          |
| 846.8      | Other specified sites of sacroiliac region sprain and strain                              | x                                                | X                                                     |                                                          |
| 846.9      | Unspecified site of sacroiliac region sprain and strain                                   | x                                                | X                                                     |                                                          |
| 847.2      | Lumbar sprain and strain                                                                  | x                                                | X                                                     |                                                          |
| 847.3      | Sprain and strain of sacrum                                                               | x                                                | X                                                     |                                                          |
| 847.4      | Sprain and strain of coccyx                                                               | x                                                | X                                                     |                                                          |
| 722.10     | Displacement of lumbar intervertebral disc without myelopathy                             | x                                                | X                                                     |                                                          |
| 722.73     | Intervertebral disc herniation Intervertebral disc disorder with myelopathy lumbar region | x                                                | X                                                     |                                                          |
| 724.02     | Spinal stenosis, lumbar region, without neurogenic claudication                           | x                                                | X                                                     |                                                          |
| 724.03     | Spinal stenosis, lumbar region, with neurogenic claudication                              | x                                                | X                                                     |                                                          |
| 756.11     | Spondylolysis, lumbosacral region (congenital)                                            | x                                                | X                                                     |                                                          |
| 721.5      | Kissing spine                                                                             |                                                  | X                                                     |                                                          |
| 721.6      | Ankylosing vertebral hyperostosis                                                         |                                                  | X                                                     |                                                          |
| 721.7      | Traumatic spondylopathy                                                                   |                                                  | X                                                     |                                                          |
| 721.8      | Other allied disorders of spine                                                           |                                                  | X                                                     |                                                          |

|               |                                                                       |  |   |   |
|---------------|-----------------------------------------------------------------------|--|---|---|
| 721.90        | Spondylosis of unspecified site without mention of myelopathy         |  | x |   |
| 721.91        | Spondylosis of unspecified site with myelopathy                       |  | x |   |
| 722.30        | Schmorl nodes, unspecified region                                     |  | x |   |
| 722.90        | Other and unspecified disc disorder of unspecified region             |  | x |   |
| 724.8         | Other symptoms referable to back                                      |  | x |   |
| 724.9         | Other unspecified back disorders                                      |  | x |   |
| 847.9         | Sprain and strain of unspecified site of back                         |  | x |   |
| 722.2         | Displacement of intervertebral disc, site unspecified, w/o myelopathy |  | x |   |
| 722.6         | Degeneration of intervertebral disc site unspecified                  |  | x |   |
| 724.00        | Spinal stenosis of unspecified region                                 |  | x |   |
| 724.09        | Spinal stenosis of other region                                       |  | x |   |
| 738.4         | Acquired spondylolisthesis                                            |  | x |   |
| 738.5         | Other acquired deformity of back or spine                             |  | x |   |
| 756.12        | Spondylolisthesis (congenital)                                        |  | x |   |
| 806.0-806.9   | Fracture of vertebral column with spinal cord injury                  |  | x | x |
| 805.0-805.9   | Fracture of vertebral column without mention of spinal cord injury    |  | x | x |
| 733.1x        | Pathologic fractures                                                  |  | x | x |
| 839.00-839.59 | Vertebral dislocations                                                |  | x | x |
| 720.0-720.9   | Inflammatory spondyloarthropathies                                    |  | x | x |
| 324.1         | Intraspinal abscess                                                   |  | x | x |
| 140-239.9     | Cancer/neoplasms                                                      |  | x | x |
| 730-730.99    | Osteomyelitis                                                         |  | x | x |
| 353.2         | Cervical root lesions, not elsewhere classified                       |  |   |   |
| 353.3         | Thoracic root lesions, not elsewhere classified                       |  |   |   |
| 721.0         | Cervical spondylosis without myelopathy                               |  |   |   |
| 721.1         | Cervical spondylosis with myelopathy                                  |  |   |   |
| 721.2         | Thoracic spondylosis without myelopathy                               |  |   |   |
| 721.41        | Spondylosis with myelopathy, thoracic region                          |  |   |   |
| 722.0         | Displacement of cervical intervertebral disc without myelopathy       |  |   |   |
| 722.11        | Displacement of thoracic intervertebral disc without myelopathy       |  |   |   |
| 722.4         | Degeneration of cervical intervertebral disc                          |  |   |   |
| 722.71        | Intervertebral disc disorder with myelopathy, cervical region         |  |   |   |
| 722.72        | Intervertebral disc disorder with myelopathy, thoracic region         |  |   |   |
| 722.81        | Postlaminectomy syndrome, cervical region                             |  |   |   |
| 722.82        | Postlaminectomy syndrome, thoracic region                             |  |   |   |
| 722.91        | Other and unspecified disc disorder, cervical region                  |  |   |   |
| 722.92        | Other and unspecified disc disorder, thoracic region                  |  |   |   |
| 723.0         | Spinal stenosis in cervical region                                    |  |   |   |

1  
2  
3  
4  
5  
6  
7  
8  
9  
10  
11  
12  
13  
14  
15  
16  
17  
18  
19  
20  
21  
22  
23  
24  
25  
26  
27  
28  
29  
30  
31  
32  
33  
34  
35  
36  
37  
38  
39  
40  
41  
42  
43  
44  
45  
46  
47  
48  
49  
50  
51  
52  
53  
54  
55  
56  
57  
58  
59  
60

|        |                                      |  |  |  |
|--------|--------------------------------------|--|--|--|
| 723.4  | Brachial neuritis or radiculitis NOS |  |  |  |
| 724.01 | Spinal stenosis, thoracic region     |  |  |  |

For peer review only

**Appendix 1c: ICD-9 Procedures for Exclusion Criteria**

| <b>ICD-9 code</b> | <b>Description</b>                                                                               |
|-------------------|--------------------------------------------------------------------------------------------------|
| 03.01             | Removal Of Foreign Body From Spinal Canal                                                        |
| 03.02             | Reopening Of Laminectomy Site                                                                    |
| 03.09             | Other Exploration And Decompression Of Spinal Cana                                               |
| 03.1              | Division Of Intraspinal Nerve Root                                                               |
| 03.2x             | chordotomy                                                                                       |
| 03.4              | Excision Or Destruction Of Lesion Of Spinal Cord Or Spinal Meninges                              |
| 03.5x             | Plastic Operations On Spinal Cord Structures (multiple subcat.)                                  |
| 03.6              | Lysis Of Adhesions Of Spinal Cord And Nerve Roots                                                |
| 03.7              | Shunt Of Spinal Theca                                                                            |
| 03.8              | Injection Of Destructive Agent Into Spinal Canal                                                 |
| 03.93             | Insert/Replace Spinal Neurostimulator                                                            |
| 03.94             | Removal Of Spinal Neurostimulator                                                                |
| 03.97             | Revision Of Spinal Thecal Shunt                                                                  |
| 03.98             | Removal Of Spinal Thecal Shunt                                                                   |
| 80.50             | Excision Or Destruction Of Intervertebral Disc, Unspecified                                      |
| 80.51             | Excision Of Intervertebral Disc                                                                  |
| 80.52             | Intervertebral Chemonucleolysis                                                                  |
| 80.53             | Repair Of The Anulus Fibrosus With Graft Or Prosthesis                                           |
| 80.54             | Other And Unspecified Repair Of The Anulus Fibrosus                                              |
| 80.59             | Other Destruction Of Intervertebral Disc                                                         |
| 81.00             | Spinal Fusion, Not Otherwise Specified                                                           |
| 81.01             | Atlas-Axis Spinal Fusion                                                                         |
| 81.02             | Other Cervical Fusion Of The Anterior Column, Anterior Technique                                 |
| 81.03             | Other Cervical Fusion Of The Posterior Column, Posterior Technique                               |
| 81.04             | Dorsal And Dorsolumbar Fusion Of The Anterior Column, Anterior Technique                         |
| 81.05             | Dorsal And Dorsolumbar Fusion Of The Posterior Column, Posterior Technique                       |
| 81.06             | Lumbar And Lumbosacral Fusion Of The Anterior Column, Anterior Technique                         |
| 81.07             | Lumbar And Lumbosacral Fusion Of The Posterior Column, Lateral Transverse Process Technique      |
| 81.08             | Lumbar And Lumbosacral Fusion Of The Anterior Column, Posterior Technique                        |
| 81.09             | Other spinal fusion ? No longer in use?                                                          |
| 81.30             | Refusion Of Spine, Not Otherwise Specified                                                       |
| 81.31             | Refusion Of Atlas-Axis Spine                                                                     |
| 81.32             | Refusion Of Other Cervical Spine, Anterior Column, Anterior Technique                            |
| 81.33             | Refusion Of Other Cervical Spine, Posterior Column, Posterior Technique                          |
| 81.34             | Refusion Of Dorsal And Dorsolumbar Spine, Anterior Column, Anterior Technique                    |
| 81.35             | Refusion Of Dorsal And Dorsolumbar Spine, Posterior Column, Posterior Technique                  |
| 81.36             | Refusion Of Lumbar And Lumbosacral Spine, Anterior Column, Anterior Technique                    |
| 81.37             | Refusion Of Lumbar And Lumbosacral Spine, Posterior Column, Lateral Transverse Process Technique |
| 81.38             | Refusion Of Lumbar And Lumbosacral Spine, Anterior Column, Posterior Technique                   |

|    |       |                                                                                       |
|----|-------|---------------------------------------------------------------------------------------|
| 1  |       |                                                                                       |
| 2  |       |                                                                                       |
| 3  | 81.39 | Refusion Of Spine, Not Elsewhere Classified                                           |
| 4  | 81.63 | Fusion Or Refusion Of 4-8 Vertebrae                                                   |
| 5  | 81.64 | Fusion Or Refusion Of 9 Or More Vertebrae                                             |
| 6  | 84.51 | Insertion Of Interbody Spinal Fusion Device                                           |
| 7  | 84.58 | Implantation of interspinous process decompression device                             |
| 8  | 84.59 | Insert Of Other Spinal Devices                                                        |
| 9  | 84.60 | Insertion Of Spinal Disc Prosthesis; Not Otherwise Specified                          |
| 10 | 84.61 | Insertion Of Partial Spinal Disc Prosthesis, Cervical                                 |
| 11 | 84.62 | Insertion Of Total Spinal Disc Prosthesis, Cervical                                   |
| 12 | 84.63 | Insertion Of Spinal Disc Prosthesis, Thoracic                                         |
| 13 | 84.64 | Insertion Of Partial Spinal Disc Prosthesis, Lumbosacral                              |
| 14 | 84.65 | Insertion Of Total Spinal Disc Prosthesis, Lumbosacral                                |
| 15 | 84.66 | Revision Or Replacement Of Artificial Spinal Disc Prosthesis                          |
| 16 | 84.67 | Revision Or Replacement Of Artificial Spinal Disc Prosthesis, Thoracic                |
| 17 | 84.68 | Revision Or Replacement Of Artificial Spinal Disc Prosthesis, Lumbosacral             |
| 18 | 84.69 | Revision Or Replacement Of Artificial Spinal Disc Prosthesis, Not Otherwise Specified |
| 19 | 84.80 | Insertion Or Replacement Of Interspinous Process Device(s)                            |
| 20 | 84.81 | Revision Of Interspinous Process Device(s)                                            |
| 21 | 84.82 | Insertion Or Replacement Of Pedicle-Based Dynamic Stabilization Device(s)             |
| 22 | 84.83 | Revision Of Pedicle-Based Dynamic Stabilization Device(s)                             |
| 23 | 85.84 | Insertion Or Replacement Of Facet Replacement Device(s)                               |
| 24 | 84.85 | Revision Of Facet Replacement Device(s)                                               |
| 25 |       |                                                                                       |
| 26 |       |                                                                                       |
| 27 |       |                                                                                       |
| 28 |       |                                                                                       |
| 29 |       |                                                                                       |
| 30 |       |                                                                                       |
| 31 |       |                                                                                       |
| 32 |       |                                                                                       |
| 33 |       |                                                                                       |
| 34 |       |                                                                                       |
| 35 |       |                                                                                       |
| 36 |       |                                                                                       |
| 37 |       |                                                                                       |
| 38 |       |                                                                                       |
| 39 |       |                                                                                       |
| 40 |       |                                                                                       |
| 41 |       |                                                                                       |
| 42 |       |                                                                                       |
| 43 |       |                                                                                       |
| 44 |       |                                                                                       |
| 45 |       |                                                                                       |
| 46 |       |                                                                                       |
| 47 |       |                                                                                       |
| 48 |       |                                                                                       |
| 49 |       |                                                                                       |
| 50 |       |                                                                                       |
| 51 |       |                                                                                       |
| 52 |       |                                                                                       |
| 53 |       |                                                                                       |
| 54 |       |                                                                                       |
| 55 |       |                                                                                       |
| 56 |       |                                                                                       |
| 57 |       |                                                                                       |
| 58 |       |                                                                                       |
| 59 |       |                                                                                       |
| 60 |       |                                                                                       |

**Appendix 1d: CPT Codes for Exclusion Criteria**

| CPT code | Description                                                                                                                                                                                                     |
|----------|-----------------------------------------------------------------------------------------------------------------------------------------------------------------------------------------------------------------|
| 00630    | anesthesia for procedures in lumbar region; not otherwise specified.                                                                                                                                            |
| 00670    | anesthesia for extensive spine and spinal cord procedures.                                                                                                                                                      |
| 06300    | vertebral corpectomy (vertebral body resection), partial or complete, for excision of intraspinal lesion, single segment; extradural, cervical                                                                  |
| 20250    | biopsy, vertebral body, open, thoracic                                                                                                                                                                          |
| 20930    | allograft for spine surgery only; morselized (list separately in addition to code for primary procedure)                                                                                                        |
| 20936    | autograft for spine surgery only (includes harvesting the graft); local (eg, ribs, spinous process, or lamina fragments) obtained from same incision                                                            |
| 20937    | autograft for spine surgery only (includes harvesting the graft); morselized (through separate skin or fascial incision) (list separately in addition to code for primary procedure)                            |
| 20938    | autograft for spine surgery only (includes harvesting the graft); structural, bicortical or tricortical (through separate skin or fascial incision) (list separately in addition to code for primary procedure) |
| 22010    | incision & drainage: deep abscess: posterior spine; cervical/thoracic/cervicothoracic                                                                                                                           |
| 22015    | incision & drainage: deep abscess: posterior spine; lumbar/sacral/lumbosacral                                                                                                                                   |
| 22100    | partial excision of posterior vertebral component (eg, spinous process, lamina or facet) for intrinsic bony lesion, single vertebral segment; cervical                                                          |
| 22101    | partial excision of posterior vertebral component (eg, spinous process, lamina or facet) for intrinsic bony lesion, single vertebral segment; thoracic                                                          |
| 22102    | partial excision of posterior vertebral component (eg, spinous process, lamina or facet) for intrinsic bony lesion, single vertebral segment; lumbar                                                            |
| 22103    | partial excision of posterior vertebral component (eg, spinous process, lamina or facet) for intrinsic bony lesion, single vertebral segment; each additional segment                                           |
| 22110    | partial excision of vertebral body, for intrinsic bony lesion, without decompression of spinal cord or nerve root(s), single vertebral segment; cervical                                                        |
| 22112    | partial excision of vertebral body, for intrinsic bony lesion, without decompression of spinal cord or nerve root(s), single vertebral segment; thoracic                                                        |
| 22114    | partial excision of vertebral body, for intrinsic bony lesion, without decompression of spinal cord or nerve root(s), single vertebral segment; lumbar                                                          |
| 22116    | partial excision of vertebral body, for intrinsic bony lesion, without decompression of spinal cord or nerve root(s), single vertebral segment; each additional vertebral segment                               |
| 22206    | osteotomy of spine, posterior or posterolateral approach, three columns, one vertebral segment (eg, pedicle/vertebral body subtraction); thoracic                                                               |
| 22207    | osteotomy of spine, posterior or posterolateral approach, three columns, one vertebral segment (eg, pedicle/vertebral body subtraction); lumbar                                                                 |
| 22208    | osteotomy of spine, posterior or posterolateral approach, three columns, one vertebral segment (eg, pedicle/vertebral body subtraction); each additional vertebral segment                                      |
| 22210    | osteotomy of spine, posterior or posterolateral approach, one vertebral segment; cervical                                                                                                                       |
| 22212    | osteotomy of spine, posterior or posterolateral approach, one vertebral segment; thoracic                                                                                                                       |
| 22214    | osteotomy of spine, posterior or posterolateral approach, one vertebral segment; lumbar                                                                                                                         |
| 22216    | osteotomy of spine, posterior or posterolateral approach, one vertebral segment; each additional vertebral segment (list separately in addition to primary procedure)                                           |
| 22220    | osteotomy of spine, including discectomy, anterior approach, single vertebral segment; cervical                                                                                                                 |

|       |                                                                                                                                                                                                                                                                                                                                                                                |
|-------|--------------------------------------------------------------------------------------------------------------------------------------------------------------------------------------------------------------------------------------------------------------------------------------------------------------------------------------------------------------------------------|
| 22222 | osteotomy of spine, including discectomy, anterior approach, single vertebral segment; thoracic                                                                                                                                                                                                                                                                                |
| 22224 | osteotomy of spine, including discectomy, anterior approach, single vertebral segment; lumbar                                                                                                                                                                                                                                                                                  |
| 22226 | osteotomy of spine, including discectomy, anterior approach, single vertebral segment; each additional vertebral segment                                                                                                                                                                                                                                                       |
| 22305 | closed treatment of vertebral process fracture(s)                                                                                                                                                                                                                                                                                                                              |
| 22310 | closed treatment of vertebral body fracture(s), without manipulation, requiring and including casting or bracing                                                                                                                                                                                                                                                               |
| 22315 | closed treatment of vertebral fracture(s) and/or dislocation(s) requiring casting or bracing, with and including casting and/or bracing, with or without anesthesia, by manipulation or traction                                                                                                                                                                               |
| 22318 | open treatment and/or reduction of odontoid fracture(s) and or dislocation(s) (including os odontoideum), anterior approach, including placement of internal fixation; without grafting                                                                                                                                                                                        |
| 22319 | open treatment and/or reduction of odontoid fracture(s) and or dislocation(s) (including os odontoideum), anterior approach, including placement of internal fixation; with grafting                                                                                                                                                                                           |
| 22325 | open treatment and/or reduction of vertebral fracture(s) and/or dislocation(s), posterior approach, 1 fractured vertebra or dislocated segment; lumbar                                                                                                                                                                                                                         |
| 22326 | open treatment and/or reduction of vertebral fracture(s) and/or dislocation(s), posterior approach, one fractured vertebra or dislocated segment; cervical                                                                                                                                                                                                                     |
| 22327 | open treatment and/or reduction of vertebral fracture(s) and/or dislocation(s), posterior approach, one fractured vertebra or dislocated segment; thoracic                                                                                                                                                                                                                     |
| 22328 | open treatment and/or reduction of vertebral fracture(s) and/or dislocation(s), posterior approach, one fractured vertebra or dislocated segment; each additional fractured vertebra or dislocated segment                                                                                                                                                                     |
| 22505 | manipulation of spine requiring anesthesia, any region                                                                                                                                                                                                                                                                                                                         |
| 22511 | percutaneous vertebroplasty (bone biopsy included when performed), 1 vertebral body, unilateral or bilateral injection, inclusive of all imaging guidance; lumbosacral                                                                                                                                                                                                         |
| 22513 | percutaneous vertebral augmentation, including cavity creation (fracture reduction and bone biopsy included when performed) using mechanical device (eg, kyphoplasty), 1 vertebral body, unilateral or bilateral cannulation, inclusive of all imaging guidance; thoracic                                                                                                      |
| 22514 | percutaneous vertebral augmentation, including cavity creation (fracture reduction and bone biopsy included when performed) using mechanical device (eg, kyphoplasty), 1 vertebral body, unilateral or bilateral cannulation, inclusive of all imaging guidance; lumbar                                                                                                        |
| 22515 | percutaneous vertebral augmentation, including cavity creation (fracture reduction and bone biopsy included when performed) using mechanical device (eg, kyphoplasty), 1 vertebral body, unilateral or bilateral cannulation, inclusive of all imaging guidance; each additional thoracic or lumbar vertebral body (list separately in addition to code for primary procedure) |
| 22520 | percutaneous vertebroplasty, one vertebral body, unilateral or bilateral injection; thoracic                                                                                                                                                                                                                                                                                   |
| 22521 | percutaneous vertebroplasty, one vertebral body, unilateral or bilateral injection; lumbar                                                                                                                                                                                                                                                                                     |
| 22522 | percutaneous vertebroplasty each additional thoracic or lumbar vertebral body                                                                                                                                                                                                                                                                                                  |
| 22523 | percutaneous vertebral augmentation, including cavity creation (fracture reduction and bone biopsy included when performed) using mechanical device, one vertebral body, unilateral or bilateral cannulation (eg, kyphoplasty); thoracic                                                                                                                                       |
| 22524 | percutaneous vertebral augmentation, including cavity creation (fracture reduction and bone biopsy included when performed) using mechanical device, one vertebral body, unilateral or bilateral cannulation (eg, kyphoplasty); lumbar                                                                                                                                         |

|       |                                                                                                                                                                                                                                                                                   |
|-------|-----------------------------------------------------------------------------------------------------------------------------------------------------------------------------------------------------------------------------------------------------------------------------------|
| 22525 | percutaneous vertebral augmentation, including cavity creation (fracture reduction and bone biopsy included when performed) using mechanical device, one vertebral body, unilateral or bilateral cannulation (eg, kyphoplasty); each additional thoracic or lumbar vertebral body |
| 22526 | percutaneous intradiscal electrothermal annuloplasty, unilateral or bilateral including fluoroscopic guidance; single level                                                                                                                                                       |
| 22527 | percutaneous intradiscal electrothermal annuloplasty, unilateral or bilateral including fluoroscopic guidance; one or more additional levels                                                                                                                                      |
| 22532 | arthrodesis, lateral extracavitary technique, including minimal discectomy to prepare interspace (other than for decompression); thoracic                                                                                                                                         |
| 22533 | arthrodesis, lateral extracavitary technique, including minimal discectomy to prepare interspace (other than for decompression); lumbar                                                                                                                                           |
| 22534 | add-on code to describe each additional vertebral segment on which the arthrodesis using lateral extracavitary approach is performed, after the first segment. this code should be used in conjunction with cpt code 22532 and 22533.                                             |
| 22548 | arthrodesis, anterior transoral or extraoral technique, clivus-c1-c2 (atlas-axis), with or without excision of odontoid process                                                                                                                                                   |
| 22551 | arthrodesis, anterior interbody, including disc space preparation, discectomy, osteophylectomy and decompression of spinal cord and/or nerve roots; cervical below c2                                                                                                             |
| 22554 | arthrodesis, anterior interbody technique, including minimal discectomy to prepare interspace (other than for decompression); cervical below c2                                                                                                                                   |
| 22556 | arthrodesis, anterior interbody technique, including minimal discectomy to prepare interspace (other than for decompression); thoracic                                                                                                                                            |
| 22558 | anterior lumbar interbody fusion, first interspace                                                                                                                                                                                                                                |
| 22585 | anterior lumbar interbody fusion, additional interspace                                                                                                                                                                                                                           |
| 22586 | arthrodesis, pre-sacral interbody technique, including disc space preparation, discectomy, with posterior instrumentation, with image guidance, includes bone graft when performed, l5-s1 interspace                                                                              |
| 22590 | arthrodesis, posterior technique, craniocervical (occiput-c2)                                                                                                                                                                                                                     |
| 22595 | arthrodesis, posterior technique, atlas-axis (c1-c2)                                                                                                                                                                                                                              |
| 22600 | arthrodesis, posterior or posterolateral technique, single level; cervical below c2 segment                                                                                                                                                                                       |
| 22610 | arthrodesis, posterior or posterolateral technique, single level; thoracic (with or without lateral transverse technique)                                                                                                                                                         |
| 22612 | arthrodesis, posterior or posterolateral technique, single level; lumbar (with or without lateral transverse technique)                                                                                                                                                           |
| 22614 | arthrodesis, posterior or posterolateral technique, single level; each additional vertebral segment                                                                                                                                                                               |
| 22630 | arthrodesis, posterior interbody technique, including laminectomy and/or discectomy to prepare interspace (other than for decompression), single interspace; lumbar                                                                                                               |
| 22632 | posterior lumbar interbody fusion, each additional interspace                                                                                                                                                                                                                     |
| 22633 | arthrodesis, combined posterior or posterolateral technique with posterior interbody technique including laminectomy and/or discectomy sufficient to prepare interspace (other than for decompression), single interspace and segment; lumbar                                     |
| 22634 | arthrodesis, combined posterior or posterolateral technique with posterior interbody technique including laminectomy and/or discectomy sufficient to prepare interspace (other than for decompression), single interspace and segment; each additional interspace and segment     |
| 22800 | arthrodesis, posterior, for spinal deformity, with or without cast; up to 6 vertebral segments                                                                                                                                                                                    |



|       |                                                                                                                                                                                                                                     |
|-------|-------------------------------------------------------------------------------------------------------------------------------------------------------------------------------------------------------------------------------------|
| 22802 | arthrodesis, posterior, for spinal deformity, with or without cast; 7 to 12 vertebral segments                                                                                                                                      |
| 22804 | arthrodesis, posterior, for spinal deformity, with or without cast; 13 or more vertebral segments                                                                                                                                   |
| 22808 | arthrodesis, anterior, for spinal deformity, with or without cast; 2 to 3 vertebral segments                                                                                                                                        |
| 22810 | arthrodesis, anterior, for spinal deformity, with or without cast; 4 to 7 vertebral segments                                                                                                                                        |
| 22812 | arthrodesis, anterior, for spinal deformity, with or without cast; 8 or more vertebral segments                                                                                                                                     |
| 22818 | kyphectomy, circumferential exposure of spine and resection of vertebral segment(s) (including body and posterior elements); single or 2 segments                                                                                   |
| 22819 | kyphectomy, circumferential exposure of spine and resection of vertebral segment(s) (including body and posterior elements); 3 or more segments                                                                                     |
| 22830 | exploration of spinal fusion                                                                                                                                                                                                        |
| 22840 | posterior non-segmental instrumentation (eg, harrington rod technique, pedicle fixation across one interspace, atlantoaxial transarticular screw fixation, sublaminar wiring at c1, facet screw fixation)                           |
| 22841 | internal spinal fixation by wiring of spinous processes                                                                                                                                                                             |
| 22842 | posterior segmental instrumentation (eg, pedicle fixation, dual rods with multiple hooks and sublaminar wires); 3 to 6 vertebral segments                                                                                           |
| 22843 | posterior segmental instrumentation (eg, pedicle fixation, dual rods with multiple hooks and sublaminar wires); 7 to 12 vertebral segments                                                                                          |
| 22844 | posterior segmental instrumentation (eg, pedicle fixation, dual rods with multiple hooks and sublaminar wires); 13 or more vertebral segments                                                                                       |
| 22845 | anterior instrumentation; 2 to 3 vertebral segments                                                                                                                                                                                 |
| 22846 | anterior instrumentation; 4 to 7 vertebral segments                                                                                                                                                                                 |
| 22847 | anterior instrumentation; 8 or more vertebral segments                                                                                                                                                                              |
| 22848 | pelvic fixation (attachment of caudal end of instrumentation to pelvic bony structures) other than sacrum                                                                                                                           |
| 22849 | reinsertion of spinal fixation device                                                                                                                                                                                               |
| 22850 | removal of posterior nonsegmental instrumentation (eg, harrington rod)                                                                                                                                                              |
| 22851 | application of intervertebral biomechanical device(s) (eg, synthetic cage(s), threaded bone dowel(s), methylmethacrylate) to vertebral defect or interspace                                                                         |
| 22852 | removal of posterior segmental instrumentation                                                                                                                                                                                      |
| 22855 | removal of anterior instrumentation                                                                                                                                                                                                 |
| 22856 | total disc arthroplasty (artificial disc), anterior approach, including discectomy with end plate preparation (includes osteophyctomy for nerve root or spinal cord decompression and microdissection), single interspace, cervical |
| 22857 | total disc arthroplasty (artificial disc), anterior approach, including discectomy to prepare interspace (other than for decompression), single interspace, lumbar                                                                  |
| 22861 | revision including replacement of total disc arthroplasty (artificial disc), anterior approach, single interspace; cervical                                                                                                         |
| 22862 | removal of total disc arthroplasty (artificial disc), anterior approach, single interspace; cervical                                                                                                                                |
| 22864 | removal of total disc arthroplasty (artificial disc), anterior approach, single interspace; cervical                                                                                                                                |
| 22865 | removal of total disc arthroplasty (artificial disc), anterior approach, single interspace; lumbar                                                                                                                                  |
| 27096 | injection procedure for si joint, arthrography, and/or anesthetic steroid                                                                                                                                                           |
| 62263 | percutaneous lysis of epidural adhesions using solution injection or mechanical means, including radiologic localization, multiple adhesiolysis sessions, two or more days                                                          |

|       |                                                                                                                                                                                                                                                                                                                                                                   |
|-------|-------------------------------------------------------------------------------------------------------------------------------------------------------------------------------------------------------------------------------------------------------------------------------------------------------------------------------------------------------------------|
| 62264 | percutaneous lysis of epidural adhesions using solution injection or mechanical means, including radiologic localization, multiple adhesiolysis sessions one day                                                                                                                                                                                                  |
| 62281 | injection/infusion of neurolytic substance (eg, alcohol, phenol, iced saline solutions), with or without other therapeutic substance; epidural, cervical or thoracic                                                                                                                                                                                              |
| 62282 | injection/infusion of neurolytic substance (eg, alcohol, phenol, iced saline solutions), with or without other therapeutic substance; epidural, lumbar, sacral (caudal)                                                                                                                                                                                           |
| 62287 | aspiration procedure, percutaneous, of nucleus pulposus of intervertebral disk, any method, single or multiple levels, lumbar.                                                                                                                                                                                                                                    |
| 62292 | injection procedure for chemonucleolysis, including discography, intervertebral disc, single or multiple levels, lumbar                                                                                                                                                                                                                                           |
| 62310 | injection, single (not via indwelling catheter), not including neurolytic substances, with or without contrast (for either localization or epidurography), of diagnostic or therapeutic substance(s) (including anesthetic, antispasmodic, opioid, steroid, other solution), epidural or subarachnoid; cervical or thoracic                                       |
| 62311 | injection, single (not via indwelling catheter), not including neurolytic substances, with or without contrast (for either localization or epidurography), of diagnostic or therapeutic substance(s) (including anesthetic, antispasmodic, opioid, steroid, other solution), epidural or subarachnoid; lumbar, sacral (caudal)                                    |
| 62318 | injection, including catheter placement, continuous infusion or intermittent bolus, not including neurolytic substances, with or without contrast (for either localization or epidurography), of diagnostic or therapeutic substance(s) (including anesthetic, antispasmodic, opioid, steroid, other solution), epidural or subarachnoid; cervical or thoracic    |
| 62319 | injection, including catheter placement, continuous infusion or intermittent bolus, not including neurolytic substances, with or without contrast (for either localization or epidurography), of diagnostic or therapeutic substance(s) (including anesthetic, antispasmodic, opioid, steroid, other solution), epidural or subarachnoid; lumbar, sacral (caudal) |
| 62322 | injection(s), of diagnostic or therapeutic substance(s) (eg, anesthetic, antispasmodic, opioid, steroid, other solution), not including neurolytic substances, including needle or catheter placement, interlaminar epidural or subarachnoid, lumbar or sacral (caudal) section                                                                                   |
| 62323 | injection(s), of diagnostic or therapeutic substance(s) (eg, anesthetic, antispasmodic, opioid, steroid, other solution), not including neurolytic substances, including needle or catheter placement, interlaminar epidural or subarachnoid, lumbar or sacral (caudal); with imaging guidance (ie, fluoroscopy or ct)                                            |
| 62350 | implantation, revision or repositioning of tunneled intrathecal or epidural catheter, for long-term medication administration via an external pump or implantable reservoir/infusion pump; without laminectomy                                                                                                                                                    |
| 62351 | implantation, revision or repositioning of tunneled intrathecal or epidural catheter, for long-term medication administration via an external pump or implantable reservoir/infusion pump; with laminectomy                                                                                                                                                       |
| 62355 | removal of previously implanted intrathecal or epidural catheter.                                                                                                                                                                                                                                                                                                 |
| 62360 | implantation or replacement of device for intrathecal or epidural drug infusion; subcutaneous reservoir                                                                                                                                                                                                                                                           |
| 62361 | implantation or replacement of device for intrathecal or epidural drug infusion; nonprogrammable pump                                                                                                                                                                                                                                                             |
| 62362 | implantation or replacement of device for intrathecal or epidural drug infusion; programmable pump, including preparation of pump, with or without programming                                                                                                                                                                                                    |
| 62365 | removal of subcutaneous reservoir or pump, previously implanted for intrathecal or epidural infusion                                                                                                                                                                                                                                                              |
| 62367 | electronic analysis of programmable, implanted pump for intrathecal or epidural drug infusion (includes evaluation of reservoir status, alarm status, drug prescription status); without reprogramming or refill                                                                                                                                                  |

|       |                                                                                                                                                                                                                                                                                         |
|-------|-----------------------------------------------------------------------------------------------------------------------------------------------------------------------------------------------------------------------------------------------------------------------------------------|
| 62368 | electronic analysis of programmable, implanted pump for intrathecal or epidural drug infusion (includes evaluation of reservoir status, alarm status, drug prescription status); with reprogramming                                                                                     |
| 62369 | electronic analysis of programmable, implanted pump for intrathecal or epidural drug infusion (includes evaluation of reservoir status, alarm status, drug prescription status); with reprogramming and refill                                                                          |
| 62370 | electronic analysis of programmable, implanted pump for intrathecal or epidural drug infusion (includes evaluation of reservoir status, alarm status, drug prescription status); with reprogramming and refill (requiring physician's skill)                                            |
| 63001 | laminectomy with exploration and/or decompression of spinal cord and/or cauda equina, without facetectomy, foraminotomy or discectomy (e.g., spinal stenosis), 1 or 2 vertebral segments; cervical                                                                                      |
| 63003 | laminectomy with exploration and/or decompression of spinal cord and/or cauda equina, without facetectomy, foraminotomy or discectomy (e.g., spinal stenosis), 1 or 2 vertebral segments; thoracic                                                                                      |
| 63005 | lumbar laminectomy without facetectomy, foraminotomy or discectomy, 1 or 2 segments                                                                                                                                                                                                     |
| 63011 | laminectomy with exploration and/or decompression of spinal cord and/or cauda equina, without facetectomy, foraminotomy or discectomy (e.g., spinal stenosis), 1 or 2 vertebral segments; sacral                                                                                        |
| 63012 | lumbar laminectomy for spondylolisthesis with removal of abnormal facet or pars interarticularis)                                                                                                                                                                                       |
| 63015 | laminectomy with exploration and/or decompression of spinal cord and/or cauda equina, without facetectomy, foraminotomy or discectomy (e.g., spinal stenosis), more than 2 vertebral segments; cervical                                                                                 |
| 63016 | laminectomy with exploration and/or decompression of spinal cord and/or cauda equina, without facetectomy, foraminotomy or discectomy (e.g., spinal stenosis), more than 2 vertebral segments; thoracic                                                                                 |
| 63017 | more than two segments                                                                                                                                                                                                                                                                  |
| 63020 | laminotomy (hemilaminectomy), with decompression of nerve root(s), including partial facetectomy, foraminotomy and/or excision of herniated intervertebral disc, including open and endoscopically-assisted approaches; 1 interspace, cervical                                          |
| 63030 | lumbar laminotomy including partial facetectomy, foraminotomy, and/or excision of herniated disc                                                                                                                                                                                        |
| 63035 | each additional interspace                                                                                                                                                                                                                                                              |
| 63040 | laminotomy (hemilaminectomy), with decompression of nerve root(s), including partial facetectomy, foraminotomy and/or excision of herniated intervertebral disc, reexploration, single interspace; cervical                                                                             |
| 63042 | re-exploration lumbar laminotomy, including partial facetectomy, foraminotomy, and/or excision of herniated disc                                                                                                                                                                        |
| 63043 | laminotomy with decompression of nerve root, each additional cervical interspace                                                                                                                                                                                                        |
| 63044 | each additional interspace                                                                                                                                                                                                                                                              |
| 63045 | laminectomy, facetectomy and foraminotomy (unilateral or bilateral with decompression of spinal cord, cauda equina and/or nerve root[s], [e.g., spinal or lateral recess stenosis]), single vertebral segment; cervical                                                                 |
| 63046 | laminectomy, facetectomy and foraminotomy (unilateral or bilateral with decompression of spinal cord, cauda equina and/or nerve root[s], [e.g., spinal or lateral recess stenosis]), single vertebral segment; thoracic                                                                 |
| 63047 | lumbar laminectomy, facetectomy and foraminotomy, single level)                                                                                                                                                                                                                         |
| 63048 | each additional segment                                                                                                                                                                                                                                                                 |
| 63050 | laminoplasty, cervical, with decompression of the spinal cord, 2 or more vertebral segments                                                                                                                                                                                             |
| 63051 | laminoplasty, cervical, with decompression of the spinal cord, 2 or more vertebral segments; with reconstruction of the posterior bony elements (including the application of bridging bone graft and non-segmental fixation devices (e.g., wire, suture, mini-plates), when performed) |

|       |                                                                                                                                                                                                                                                                   |
|-------|-------------------------------------------------------------------------------------------------------------------------------------------------------------------------------------------------------------------------------------------------------------------|
| 63055 | transpedicular approach with decompression of spinal cord, equina and/or nerve root(s) (e.g., herniated intervertebral disc), single segment; thoracic                                                                                                            |
| 63056 | transpedicular approach with decompression of spinal cord, equina and/or nerve root(s) (e.g., herniated intervertebral disc), single segment; lumbar (including transfacet, or lateral extraforaminal approach) (e.g., far lateral herniated intervertebral disc) |
| 63057 | transpedicular approach with decompression of spinal cord, each additional segmen                                                                                                                                                                                 |
| 63064 | costovertebral approach with decompression of spinal cord or nerve root(s) (e.g., herniated intervertebral disc), thoracic; single segment                                                                                                                        |
| 63066 | costrovertebral approach with decompression of spinal cord or nerve roots, thoracic, each additional segment                                                                                                                                                      |
| 63075 | discectomy, anterior, with decompression of spinal cord and/or nerve root(s), including osteophyctectomy; cervical, single interspace                                                                                                                             |
| 63076 | discectomy, anterior, with decompression of spinal cord and/or nerve root(s), including osteophyctectomy; cervical, each additional interspac                                                                                                                     |
| 63077 | discectomy, anterior, with decompression of spinal cord and/or nerve root(s), including osteophyctectomy; thoracic, single interspace                                                                                                                             |
| 63078 | discectomy, anterior, with decompression of spinal cord and/or nerve root(s), including osteophyctectomy; thoracic, each additional interspace                                                                                                                    |
| 63081 | vertebral corpectomy (vertebral body resection), partial or complete, anterior approach with decompression of spinal cord and/or nerve root(s); cervical, single segment                                                                                          |
| 63082 | vertebral corpectomy (vertebral body resection), partial or complete, anterior approach with decompression of spinal cord and/or nerve root(s); cervical, each additional segment                                                                                 |
| 63085 | vertebral corpectomy (vertebral body resection), partial or complete, transthoracic approach with decompression of spinal cord and/or nerve root(s); thoracic, single segment                                                                                     |
| 63086 | vertebral corpectomy (vertebral body resection), partial or complete, transthoracic approach with decompression of spinal cord and/or nerve root(s); thoracic, each additional segment                                                                            |
| 63087 | vertebral corpectomy (vertebral body resection), partial or complete, combined thoracolumbar approach with decompression of spinal cord, cauda equina or nerve root(s), lower thoracic or lumbar; single segment                                                  |
| 63088 | vertebral corpectomy (vertebral body resection), partial or complete, combined thoracolumbar approach with decompression of spinal cord, cauda equina or nerve root(s), lower thoracic or lumbar; each additional segment                                         |
| 63090 | vertebral corpectomy (vertebral body resection), partial or complete, transperitoneal or retroperitoneal approach with decompression of spinal cord, cauda equina or nerve root(s), lower thoracic, lumbar, or sacral; single segment                             |
| 63091 | or retroperitoneal approach with decompression of spinal cord, cauda equina or nerve root(s), lower thoracic, lumbar, or sacral; each additional segment                                                                                                          |
| 63102 | vertebral corpectomy (vertebral body resection), partial or complete, lateral extracavitary approach with decompression of spinal cord and/or nerve root(s) (e.g., for tumor or retropulsed bone fragments); lumbar, single segment                               |
| 63103 | vertebral corpectomy (vertebral body resection), partial or complete, lateral extracavitary approach with decompression of spinal cord and/or nerve root(s) (e.g., for tumor or retropulsed bone fragments); thoracic or lumbar, each additional segment          |
| 63170 | laminectomy with myelotomy (e.g., bischof or drez type), cervical, thoracic, or thoracolumbar                                                                                                                                                                     |
| 63172 | laminectomy with drainage of intramedullary cyst/syrinx; to subarachnoid space                                                                                                                                                                                    |

|       |                                                                                                                                                                          |
|-------|--------------------------------------------------------------------------------------------------------------------------------------------------------------------------|
| 63173 | laminectomy with drainage of intramedullary cyst/syrinx; to peritoneal or pleural space                                                                                  |
| 63180 | laminectomy and section of dentate ligaments, with or without dural graft, cervical; 1 or 2 segments                                                                     |
| 63182 | laminectomy and section of dentate ligaments, with or without dural graft, cervical; more than 2 segments                                                                |
| 63185 | laminectomy with rhizotomy; 1 or 2 segments                                                                                                                              |
| 63190 | laminectomy with rhizotomy; more than 2 segments                                                                                                                         |
| 63191 | laminectomy with section of spinal accessory nerve                                                                                                                       |
| 63194 | laminectomy with cordotomy, with section of 1 spinothalamic tract, 1 stage; cervical                                                                                     |
| 63195 | laminectomy with cordotomy, with section of 1 spinothalamic tract, 1 stage; thoracic                                                                                     |
| 63196 | laminectomy with cordotomy, with section of both spinothalamic tracts, 1 stage; cervical                                                                                 |
| 63197 | laminectomy with cordotomy, with section of both spinothalamic tracts, 1 stage; thoracic                                                                                 |
| 63198 | laminectomy with cordotomy with section of both spinothalamic tracts, 2 stages within 14 days; cervical                                                                  |
| 63199 | laminectomy with cordotomy with section of both spinothalamic tracts, 2 stages within 14 days; thoracic                                                                  |
| 63200 | laminectomy, with release of tethered spinal cord, lumbar                                                                                                                |
| 63250 | laminectomy for excision or occlusion of arteriovenous malformation of spinal cord; cervical                                                                             |
| 63251 | laminectomy for excision or occlusion of arteriovenous malformation of spinal cord; thoracic                                                                             |
| 63252 | laminectomy for excision or occlusion of arteriovenous malformation of spinal cord; thoracolumbar                                                                        |
| 63265 | laminectomy for excision or evacuation of intraspinal lesion other than neoplasm, extradural; cervical                                                                   |
| 63266 | laminectomy for excision or evacuation of intraspinal lesion other than neoplasm, extradural; thoracic                                                                   |
| 63267 | laminectomy for excision or evacuation of intraspinal lesion other than neoplasm, extradural; lumbar                                                                     |
| 63268 | laminectomy for excision or evacuation of intraspinal lesion other than neoplasm, extradural; sacral                                                                     |
| 63270 | laminectomy for excision of intraspinal lesion other than neoplasm, intradural; cervical                                                                                 |
| 63271 | laminectomy for excision of intraspinal lesion other than neoplasm, intradural; thoracic                                                                                 |
| 63272 | laminectomy for excision of intraspinal lesion other than neoplasm, intradural; lumbar                                                                                   |
| 63273 | laminectomy for excision of intraspinal lesion other than neoplasm, intradural; sacral                                                                                   |
| 63275 | laminectomy for biopsy/excision of intraspinal neoplasm; extradural, cervical                                                                                            |
| 63276 | laminectomy for biopsy/excision of intraspinal neoplasm; extradural, thoracic                                                                                            |
| 63277 | laminectomy for biopsy/excision of intraspinal neoplasm; extradural, lumbar                                                                                              |
| 63278 | laminectomy for biopsy/excision of intraspinal neoplasm; extradural, sacral                                                                                              |
| 63280 | laminectomy for biopsy/excision of intraspinal neoplasm; intradural, extramedullary, cervical                                                                            |
| 63281 | laminectomy for biopsy/excision of intraspinal neoplasm; intradural, extramedullary, thoracic                                                                            |
| 63282 | laminectomy for biopsy/excision of intraspinal neoplasm; intradural, extramedullary, lumbar                                                                              |
| 63283 | laminectomy for biopsy/excision of intraspinal neoplasm; intradural, sacral                                                                                              |
| 63285 | laminectomy for biopsy/excision of intraspinal neoplasm; intradural, intramedullary, cervical                                                                            |
| 63286 | laminectomy for biopsy/excision of intraspinal neoplasm; intradural, intramedullary, thoracic                                                                            |
| 63287 | laminectomy for biopsy/excision of intraspinal neoplasm; intradural, intramedullary, thoracolumbar                                                                       |
| 63290 | laminectomy for biopsy/excision of intraspinal neoplasm; combined extradural-intradural lesion, any level                                                                |
| 63295 | osteoplastic reconstruction of dorsal spinal elements, following primary intraspinal procedure (list separately in addition to code for primary procedure)               |
| 63301 | vertebral corpectomy (vertebral body resection), partial or complete, for excision of intraspinal lesion, single segment; extradural, thoracic by transthoracic approach |

|       |                                                                                                                                                                                                         |
|-------|---------------------------------------------------------------------------------------------------------------------------------------------------------------------------------------------------------|
| 63302 | vertebral corpectomy (vertebral body resection), partial or complete, for excision of intraspinal lesion, single segment; extradural, thoracic by thoracolumbar approach                                |
| 63303 | vertebral corpectomy (vertebral body resection), partial or complete, for excision of intraspinal lesion, single segment; extradural, lumbar or sacral by transperitoneal or retroperitoneal approach   |
| 63304 | vertebral corpectomy (vertebral body resection), partial or complete, for excision of intraspinal lesion, single segment; intradural, cervical                                                          |
| 63305 | vertebral corpectomy (vertebral body resection), partial or complete, for excision of intraspinal lesion, single segment; intradural, thoracic by transthoracic approach                                |
| 63306 | vertebral corpectomy (vertebral body resection), partial or complete, for excision of intraspinal lesion, single segment; intradural, thoracic by thoracolumbar approach                                |
| 63307 | vertebral corpectomy (vertebral body resection), partial or complete, for excision of intraspinal lesion, single segment; intradural, lumbar or sacral by transperitoneal or retroperitoneal approach   |
| 63308 | vertebral corpectomy (vertebral body resection), partial or complete, for excision of intraspinal lesion, single segment; each additional segment                                                       |
| 63650 | dorsal column stimulator placements                                                                                                                                                                     |
| 63655 | laminectomy for implantation of neurostimulator electrodes, plate/paddle, epidural                                                                                                                      |
| 63660 | revision or removal of spinal neurostimulator electrodes                                                                                                                                                |
| 63661 | removal of spinal neurostimulator electrode percutaneous array(s), including fluoroscopy, when performed                                                                                                |
| 63662 | removal of spinal neurostimulator electrode plate/paddle(s) placed via laminotomy or laminectomy, including fluoroscopy, when performed                                                                 |
| 63663 | revision including replacement, when performed, of spinal neurostimulator electrode percutaneous array(s), including fluoroscopy, when performed                                                        |
| 63664 | revision including replacement, when performed, of spinal neurostimulator electrode plate/paddle(s) placed via laminotomy or laminectomy, including fluoroscopy, when performed                         |
| 63685 | insertion or replacement of spinal neurostimulator pulse generator or receiver, direct or inductive coupling                                                                                            |
| 63688 | revision including replacement, when performed, of spinal neurostimulator electrode plate/paddle(s) placed via laminotomy or laminectomy, including fluoroscopy, when performed                         |
| 64470 | injection, anesthetic agent and/or steroid, paravertebral facet joint or facet joint nerve; cervical or thoracic, single level                                                                          |
| 64472 | injection, anesthetic agent and/or steroid, paravertebral facet joint or facet joint nerve; cervical or thoracic, each additional level                                                                 |
| 64475 | injection, anesthetic agent and/or steroid, paravertebral facet joint or facet joint nerve; lumbar or sacral, single level                                                                              |
| 64476 | injection, anesthetic agent and/or steroid, paravertebral facet joint or facet joint nerve; lumbar or sacral, each additional level                                                                     |
| 64479 | injection, anesthetic agent and/or steroid, transforaminal epidural; cervical or thoracic, single level                                                                                                 |
| 64480 | injection, anesthetic agent and/or steroid, transforaminal epidural; cervical or thoracic, each additional level                                                                                        |
| 64483 | injection, anesthetic agent and/or steroid, transforaminal epidural; lumbar or sacral, single level                                                                                                     |
| 64484 | injection, anesthetic agent and/or steroid, transforaminal epidural; lumbar or sacral, each additional level                                                                                            |
| 64490 | injection(s), diagnostic or therapeutic agent, paravertebral facet (zygapophyseal) joint (or nerves innervating that joint) with image guidance (fluoroscopy or ct), cervical or thoracic; single level |
| 64491 | injection(s), diagnostic or therapeutic agent, paravertebral facet (zygapophyseal) joint (or nerves innervating that joint) with image guidance (fluoroscopy or ct), cervical or thoracic; second level |

|       |                                                                                                                                                                                                                                                                                                            |
|-------|------------------------------------------------------------------------------------------------------------------------------------------------------------------------------------------------------------------------------------------------------------------------------------------------------------|
| 64492 | injection(s), diagnostic or therapeutic agent, paravertebral facet (zygapophyseal) joint (or nerves innervating that joint) with image guidance (fluoroscopy or ct), cervical or thoracic; third and any additional level(s)                                                                               |
| 64493 | paravertebral facet joint injection, lumbar or sacral, single level                                                                                                                                                                                                                                        |
| 64494 | paravertebral facet joint injection, lumbar or sacral, second level                                                                                                                                                                                                                                        |
| 64495 | paravertebral facet joint injection, lumbar or sacral, third and each additional level                                                                                                                                                                                                                     |
| 64520 | Injection, anesthetic agent; lumbar or thoracic (paravertebral sympathetic)                                                                                                                                                                                                                                |
| 64553 | percutaneous implantation of neurostimulator electrode array; cranial nerve                                                                                                                                                                                                                                |
| 64622 | destruction by neurolytic agent, paravertebral facet joint nerve; lumbar or sacral, single level                                                                                                                                                                                                           |
| 64623 | lumbar or sacral, each additional level                                                                                                                                                                                                                                                                    |
| 64635 | destruction by neurolytic agent, paravertebral facet joint nerve; lumbar or sacral, single level with image guidance                                                                                                                                                                                       |
| 64636 | lumbar or sacral, each additional level with image guidance                                                                                                                                                                                                                                                |
| 95991 | refilling and maintenance of implantable pump or reservoir for drug delivery, spinal (intrathecal, epidural) or brain (intraventricular), includes electronic analysis of pump, when performed; requiring skill of a physician or other qualified health care professional                                 |
| 0092T | total disc arthroplasty (artificial disc), anterior approach, including discectomy with end plate preparation (includes osteophylectomy for nerve root or spinal cord decompression and microdissection), each additional interspace, cervical (list separately in addition to code for primary procedure) |
| 0095T | removal of total disc arthroplasty (artificial disc), anterior approach, each additional interspace, cervical (list separately in addition to code for primary procedure)                                                                                                                                  |
| 0098T | revision including replacement of total disc arthroplasty (artificial disc), anterior approach, each additional interspace, cervical (list separately in addition to code for primary procedure)                                                                                                           |
| 0163T | total disc arthroplasty (artificial disc), anterior approach, including discectomy to prepare interspace (other than for decompression), each additional interspace, lumbar (list separately in addition to code for primary procedure)                                                                    |
| 0164T | removal of total disc arthroplasty, (artificial disc), anterior approach, each additional interspace, lumbar (list separately in addition to code for primary procedure)                                                                                                                                   |
| 0165T | revision including replacement of total disc arthroplasty (artificial disc), anterior approach, each additional interspace, lumbar (list separately in addition to code for primary procedure)                                                                                                             |
| 0171T | insertion of posterior spinous process distraction device (including necessary removal of bone or ligament for insertion and imaging guidance), lumbar; single level                                                                                                                                       |
| 0172T | insertion of posterior spinous process distraction device (including necessary removal of bone or ligament for insertion and imaging guidance), lumbar; each additional level (list separately in addition to code for primary procedure)                                                                  |
| 0215T | injection(s), diagnostic or therapeutic agent, paravertebral facet (zygapophyseal) joint (or nerves innervating that joint) with ultrasound guidance, cervical or thoracic; third and any additional level(s)                                                                                              |
| 0216T | injection(s), diagnostic or therapeutic agent, paravertebral facet (zygapophyseal) joint (or nerves innervating that joint) with ultrasound guidance, lumbar or sacral; single level                                                                                                                       |
| 0217T | injection(s), diagnostic or therapeutic agent, paravertebral facet (zygapophyseal) joint (or nerves innervating that joint) with ultrasound guidance, lumbar or sacral; second level                                                                                                                       |
| 0218T | injection(s), diagnostic or therapeutic agent, paravertebral facet (zygapophyseal) joint (or nerves innervating that joint) with ultrasound guidance, lumbar or sacral; third and any additional level(s)                                                                                                  |
| 0230T | injection(s), anesthetic agent and/or steroid, transforaminal epidural, with ultrasound guidance, lumbar or sacral; single level                                                                                                                                                                           |

|       |                                                                                                                                                                                                                                                                             |
|-------|-----------------------------------------------------------------------------------------------------------------------------------------------------------------------------------------------------------------------------------------------------------------------------|
| 0231T | injection(s), anesthetic agent and/or steroid, transforaminal epidural, with ultrasound guidance, lumbar or sacral; each additional level                                                                                                                                   |
| 0282T | percutaneous or open implantation of neurostimulator electrode array(s), subcutaneous (peripheral subcutaneous field stimulation), including imaging guidance, when performed, cervical, thoracic or lumbar, for trial, including removal at the conclusion of trial period |
| 0283T | percutaneous or open implantation of neurostimulator electrode array(s), subcutaneous (peripheral subcutaneous field stimulation), including imaging guidance, when performed, cervical, thoracic or lumbar, permanent, with implantation of a pulse generator              |
| 0284T | revision or removal of pulse generator or electrodes, including imaging guidance, when performed, including addition of new electrodes, when performed                                                                                                                      |

For peer review only



**Appendix table 2:** Hosmer Lemeshow and c-statistics for all logistic models

| <b>Outcome</b>          | <b>Hosmer Lemeshow<br/>chi-square</b> | <b>p-value</b> | <b>c-statistic</b> |
|-------------------------|---------------------------------------|----------------|--------------------|
| Any opioid use          | 19.029                                | 0.015          | 0.631              |
| Early opioid use        | 15.395                                | 0.052          | 0.704              |
| Long-term opioid<br>use | 17.181                                | 0.028          | 0.753              |

For peer review only

**Appendix Table 3:** Bootstrapping, early opioid use

| Initial Provider      | n   | OR (95% CI)<br>bootstrapping | Early use, OR<br>(95% CI) |
|-----------------------|-----|------------------------------|---------------------------|
| Physical therapy      | 200 | 0.15 (0.13, 0.17)            | 0.15 (0.13,0.17)          |
| Chiropractor          | 200 | 0.10 (0.09, 0.10)            | 0.10 (0.09,0.10)          |
| Acupuncture           | 200 | 0.09 (0.07, 0.12)            | 0.09 (0.07,0.12)          |
| Orthopedics           | 200 | 0.63 (0.60, 0.67)            | 0.63 (0.60,0.67)          |
| Emergency<br>Medicine | 200 | 2.66 (2.54, 2.78)            | 2.66 (2.54,2.78)          |
| Neurosurgeon          | 200 | 0.57 (0.48, 0.69)            | 0.58 (0.47,0.71)          |
| MD Other              | 200 | 0.50 (0.46, 0.54)            | 0.50 (0.46,0.54)          |
| Radiology             | 200 | 0.70 (0.67, 0.73)            | 0.70 (0.67,0.73)          |
| Rehab                 | 200 | 0.54 (0.49, 0.59)            | 0.54 (0.49,0.59)          |
| Other                 | 200 | 0.81 (0.76, 0.87)            | 0.81 (0.76,0.87)          |

**Appendix Table 3 Legend:** Bootstrapping is a resampling technique that allows assigning of accuracy. The estimates reported using bootstrapping methods listed in this table indicate little or no differences with the actual results.

**Appendix Table 4:** Bootstrapping, long-term opioid use

| Initial Provider      | N   | OR (95% CI)<br>bootstrapping | Long-term use, OR<br>(95% CI) |
|-----------------------|-----|------------------------------|-------------------------------|
| Physical therapy      | 200 | 0.26 (0.16, 0.50)            | 0.27 (0.15,0.48)              |
| Chiropractor          | 200 | 0.22 (0.18, 0.26)            | 0.22 (0.18,0.26)              |
| Acupuncture           | 200 |                              | 0.07 (0.01,0.48)              |
| Orthopedics           | 200 | 1.09 (0.92, 1.31)            | 1.10 (0.92,1.30)              |
| Emergency<br>Medicine | 200 | 0.92 (0.77, 1.11)            | 0.92 (0.77,1.10)              |
| Neurosurgeon          | 200 | 1.45 (0.88, 2.75)            | 1.50 (0.88,2.58)              |
| MD Other              | 200 | 2.02 (1.71, 2.41)            | 2.03 (1.70,2.41)              |
| Radiology             | 200 | 1.22 (1.08, 1.38)            | 1.22 (1.08,1.39)              |
| Rehab                 | 200 | 1.77 (1.42, 2.26)            | 1.78 (1.40,2.26)              |
| Other                 | 200 | 0.88 (0.69, 1.14)            | 0.88 (0.70,1.11)              |

**Appendix Table 4 Legend:** Sample size for acupuncture was too small to report for bootstrapping.

**Appendix table 5:** Propensity matching for initial Physical Therapy (PT) and initial chiropractor vs. initial Primary Care Physician (PCP)

| <b>Outcome</b>       |                                                          | <b>OR (95% CI)</b> |
|----------------------|----------------------------------------------------------|--------------------|
| Early opioid use     | Initial PT (N=2248) vs. initial PCP (N=4496)             | 0.15 (0.12, 0.18)  |
| Long-term opioid use | Initial PT (N=2248) vs. initial PCP (N=4496)             | 0.29 (0.12, 0.69)  |
| Early opioid use     | Initial Chiropractor (N=32300) vs. initial PCP (N=32300) | 0.10 (0.09, 0.10)  |
| Long-term opioid use | Initial Chiropractor (N=32300) vs. initial PCP (N=32300) | 0.21 (0.16, 0.27)  |

For peer review only

**Appendix table 6:** Multivariable odds of initial chiropractic care and initial PT versus initial PCP as a function of baseline covariates

| Covariate                               | Levels                     | PT                 | Chiro               |
|-----------------------------------------|----------------------------|--------------------|---------------------|
|                                         |                            | OR (95% CI)        | OR (95% CI)         |
| AGE                                     | 45-65 vs 18-44             | 1.02 (0.93,1.12)   | 0.81 (0.78, 0.83) * |
|                                         | 65-74 vs 18-44             | 1.15 (0.82,1.61)   | 0.77 (0.69, 0.86) * |
| GENDER                                  | Female vs Male             | 1.16 (1.06,1.27)*  | 0.84 (0.82, 0.87) * |
| RACE                                    | Asian vs White             | 1.03 (0.86,1.23)   | 0.68 (0.64, 0.73) * |
|                                         | Black vs White             | 0.67 (0.56,0.82) * | 0.48 (0.46, 0.51) * |
|                                         | Hispanic vs White          | 0.67 (0.57,0.78) * | 0.64 (0.62, 0.67) * |
|                                         | Unknown vs White           | 0.94 (0.75,1.19)   | 0.84 (0.77, 0.90) * |
| REGION                                  | Midwest vs Northeast       | 2.11 (1.82,2.44) * | 0.87 (0.83, 0.91) * |
|                                         | South vs Northeast         | 0.88 (0.77,1.00)   | 0.86 (0.83, 0.89) * |
|                                         | West vs Northeast          | 2.11 (1.83,2.42) * | 1.00 (0.95, 1.04)   |
| Pregnancy                               |                            | 5.79 (4.92,6.83) * | 1.76 (1.62, 1.92) * |
| Accidents                               |                            | 0.74 (0.56,0.97) * | 0.36 (0.32, 0.40) * |
| Anxiety                                 |                            | 0.95 (0.82,1.11)   | 0.88 (0.84, 0.93) * |
| Bipolar                                 |                            | 0.56 (0.36,0.88) * | 0.93 (0.83, 1.05)   |
| Depression                              |                            | 0.92 (0.79,1.08)   | 0.96 (0.92, 1.01)   |
| Dementia                                |                            | -                  | 0.72 (0.43, 1.21)   |
| ADHD                                    |                            | 1.54 (1.17,2.04) * | 0.99 (0.90, 1.09)   |
| Alcohol use disorder                    |                            | 0.95 (0.60,1.49)   | 0.96 (0.83, 1.10)   |
| Substance use disorder                  |                            | 0.88 (0.47,1.62)   | 0.82 (0.68, 0.99) * |
| Chronic Pain,<br>fibromyalgia & Fatigue |                            | 1.44 (1.22,1.69) * | 0.90 (0.84, 0.95) * |
| Psychotic Disorder                      |                            | 1.00 (0.40,2.48)   | 1.14 (0.87, 1.48)   |
| Opioid use 13-24 months<br>back         |                            | 0.78 (0.69,0.87)   | 0.84 (0.81, 0.87) * |
| PT 1-24 months back                     |                            | 5.00 (4.45,5.62) * | 1.12 (1.05, 1.20) * |
| Chiro any 1-24 months<br>back           |                            | 1.45 (1.17,1.79) * | 6.92 (6.52, 7.35) * |
| Acupuncture any 1-24<br>months back     |                            | 1.80 (1.18,2.75) * | 1.39 (1.12, 1.73) * |
| LBP 13-24 months back                   |                            | 1.27 (0.98,1.65)   | 0.85 (0.77, 0.93) * |
| Elixhauser physical                     |                            | 0.91 (0.87,0.95) * | 0.91 (0.89, 0.92) * |
| PT State Access                         | Provisional vs<br>Limited  | 1.21 (1.05,1.40) * | -                   |
|                                         | Unrestricted vs<br>Limited | 1.67 (1.41,1.98) * | -                   |
| Year of index visit                     |                            | 1.06 (1.02,1.09) * | 1.02 (1.01, 1.03) * |

**Appendix Table 6 Legend:** Pregnancy: pregnancy in the 12 months prior to the initial LBP visit; Accidents: motor vehicle accidents in the 12 months prior to the initial LBP visit; \*p < .01. Reference group for age: ages 18-44; reference group for gender: male; reference group for race: white; reference group for region: Northeast; reference group for PT State Access: limited.

STROBE Statement—Checklist of items that should be included in reports of *cohort studies*

|                              | Item No | Recommendation                                                                                                                                                                                    | Page No          |
|------------------------------|---------|---------------------------------------------------------------------------------------------------------------------------------------------------------------------------------------------------|------------------|
| <b>Title and abstract</b>    | 1       | (a) Indicate the study's design with a commonly used term in the title or the abstract                                                                                                            | 1,2              |
|                              |         | (b) Provide in the abstract an informative and balanced summary of what was done and what was found                                                                                               | 2                |
| <b>Introduction</b>          |         |                                                                                                                                                                                                   |                  |
| Background/rationale         | 2       | Explain the scientific background and rationale for the investigation being reported                                                                                                              | 3                |
| Objectives                   | 3       | State specific objectives, including any prespecified hypotheses                                                                                                                                  | 4                |
| <b>Methods</b>               |         |                                                                                                                                                                                                   |                  |
| Study design                 | 4       | Present key elements of study design early in the paper                                                                                                                                           | 4-7              |
| Setting                      | 5       | Describe the setting, locations, and relevant dates, including periods of recruitment, exposure, follow-up, and data collection                                                                   | 4-6              |
| Participants                 | 6       | (a) Give the eligibility criteria, and the sources and methods of selection of participants. Describe methods of follow-up                                                                        | 4-6              |
|                              |         | (b) For matched studies, give matching criteria and number of exposed and unexposed                                                                                                               | NA               |
| Variables                    | 7       | Clearly define all outcomes, exposures, predictors, potential confounders, and effect modifiers. Give diagnostic criteria, if applicable                                                          | 4-7              |
| Data sources/<br>measurement | 8*      | For each variable of interest, give sources of data and details of methods of assessment (measurement). Describe comparability of assessment methods if there is more than one group              | 4-7              |
| Bias                         | 9       | Describe any efforts to address potential sources of bias                                                                                                                                         | 6-7              |
| Study size                   | 10      | Explain how the study size was arrived at                                                                                                                                                         | 4-7,<br>figure 1 |
| Quantitative variables       | 11      | Explain how quantitative variables were handled in the analyses. If applicable, describe which groupings were chosen and why                                                                      | 4-7              |
| Statistical methods          | 12      | (a) Describe all statistical methods, including those used to control for confounding                                                                                                             | 4-7              |
|                              |         | (b) Describe any methods used to examine subgroups and interactions                                                                                                                               | NA               |
|                              |         | (c) Explain how missing data were addressed                                                                                                                                                       | NA               |
|                              |         | (d) If applicable, explain how loss to follow-up was addressed                                                                                                                                    | NA               |
|                              |         | (e) Describe any sensitivity analyses                                                                                                                                                             | NA               |
| <b>Results</b>               |         |                                                                                                                                                                                                   |                  |
| Participants                 | 13*     | (a) Report numbers of individuals at each stage of study—eg numbers potentially eligible, examined for eligibility, confirmed eligible, included in the study, completing follow-up, and analysed | 7, figure 1      |
|                              |         | (b) Give reasons for non-participation at each stage                                                                                                                                              | NA               |
|                              |         | (c) Consider use of a flow diagram                                                                                                                                                                | Figure 1         |
| Descriptive data             | 14*     | (a) Give characteristics of study participants (eg demographic, clinical, social) and information on exposures and potential confounders                                                          | 7-9,<br>table 1  |
|                              |         | (b) Indicate number of participants with missing data for each variable of interest                                                                                                               | NA               |
|                              |         | (c) Summarise follow-up time (eg, average and total amount)                                                                                                                                       | NA               |
| Outcome data                 | 15*     | Report numbers of outcome events or summary measures over time                                                                                                                                    | 7-9,<br>table 2  |

|    |                          |    |                                                                                                                                                                                                              |
|----|--------------------------|----|--------------------------------------------------------------------------------------------------------------------------------------------------------------------------------------------------------------|
| 1  |                          |    |                                                                                                                                                                                                              |
| 2  |                          |    |                                                                                                                                                                                                              |
| 3  | Main results             | 16 | (a) Give unadjusted estimates and, if applicable, confounder-adjusted estimates and their precision (eg, 95% confidence interval). Make clear which confounders were adjusted for and why they were included |
| 4  |                          |    |                                                                                                                                                                                                              |
| 5  |                          |    |                                                                                                                                                                                                              |
| 6  |                          |    | (b) Report category boundaries when continuous variables were categorized                                                                                                                                    |
| 7  |                          |    |                                                                                                                                                                                                              |
| 8  |                          |    | (c) If relevant, consider translating estimates of relative risk into absolute risk for a meaningful time period                                                                                             |
| 9  |                          |    |                                                                                                                                                                                                              |
| 10 | Other analyses           | 17 | Report other analyses done—eg analyses of subgroups and interactions, and sensitivity analyses                                                                                                               |
| 11 |                          |    |                                                                                                                                                                                                              |
| 12 |                          |    |                                                                                                                                                                                                              |
| 13 | <b>Discussion</b>        |    |                                                                                                                                                                                                              |
| 14 | Key results              | 18 | Summarise key results with reference to study objectives                                                                                                                                                     |
| 15 | Limitations              | 19 | Discuss limitations of the study, taking into account sources of potential bias or imprecision. Discuss both direction and magnitude of any potential bias                                                   |
| 16 |                          |    |                                                                                                                                                                                                              |
| 17 |                          |    |                                                                                                                                                                                                              |
| 18 | Interpretation           | 20 | Give a cautious overall interpretation of results considering objectives, limitations, multiplicity of analyses, results from similar studies, and other relevant evidence                                   |
| 19 |                          |    |                                                                                                                                                                                                              |
| 20 | Generalisability         | 21 | Discuss the generalisability (external validity) of the study results                                                                                                                                        |
| 21 |                          |    |                                                                                                                                                                                                              |
| 22 | <b>Other information</b> |    |                                                                                                                                                                                                              |
| 23 | Funding                  | 22 | Give the source of funding and the role of the funders for the present study and, if applicable, for the original study on which the present article is based                                                |
| 24 |                          |    |                                                                                                                                                                                                              |
| 25 |                          |    |                                                                                                                                                                                                              |
| 26 |                          |    |                                                                                                                                                                                                              |
| 27 |                          |    |                                                                                                                                                                                                              |
| 28 |                          |    |                                                                                                                                                                                                              |
| 29 |                          |    |                                                                                                                                                                                                              |
| 30 |                          |    |                                                                                                                                                                                                              |
| 31 |                          |    |                                                                                                                                                                                                              |
| 32 |                          |    |                                                                                                                                                                                                              |
| 33 |                          |    |                                                                                                                                                                                                              |
| 34 |                          |    |                                                                                                                                                                                                              |
| 35 |                          |    |                                                                                                                                                                                                              |
| 36 |                          |    |                                                                                                                                                                                                              |
| 37 |                          |    |                                                                                                                                                                                                              |
| 38 |                          |    |                                                                                                                                                                                                              |
| 39 |                          |    |                                                                                                                                                                                                              |
| 40 |                          |    |                                                                                                                                                                                                              |
| 41 |                          |    |                                                                                                                                                                                                              |
| 42 |                          |    |                                                                                                                                                                                                              |
| 43 |                          |    |                                                                                                                                                                                                              |
| 44 |                          |    |                                                                                                                                                                                                              |
| 45 |                          |    |                                                                                                                                                                                                              |
| 46 |                          |    |                                                                                                                                                                                                              |
| 47 |                          |    |                                                                                                                                                                                                              |
| 48 |                          |    |                                                                                                                                                                                                              |
| 49 |                          |    |                                                                                                                                                                                                              |
| 50 |                          |    |                                                                                                                                                                                                              |
| 51 |                          |    |                                                                                                                                                                                                              |
| 52 |                          |    |                                                                                                                                                                                                              |
| 53 |                          |    |                                                                                                                                                                                                              |
| 54 |                          |    |                                                                                                                                                                                                              |
| 55 |                          |    |                                                                                                                                                                                                              |
| 56 |                          |    |                                                                                                                                                                                                              |
| 57 |                          |    |                                                                                                                                                                                                              |
| 58 |                          |    |                                                                                                                                                                                                              |
| 59 |                          |    |                                                                                                                                                                                                              |
| 60 |                          |    |                                                                                                                                                                                                              |

\*Give information separately for exposed and unexposed groups.

**Note:** An Explanation and Elaboration article discusses each checklist item and gives methodological background and published examples of transparent reporting. The STROBE checklist is best used in conjunction with this article (freely available on the Web sites of PLoS Medicine at <http://www.plosmedicine.org/>, Annals of Internal Medicine at <http://www.annals.org/>, and Epidemiology at <http://www.epidem.com/>). Information on the STROBE Initiative is available at <http://www.strobe-statement.org>.

# BMJ Open

## An Observational Retrospective Study of the Association of Initial Health Care Provider for New-onset Low Back Pain with Early and Long-Term Opioid Use

|                                 |                                                                                                                                                                                                                                                                                                                                                                                                                                                                                                                                                                                                                                                                                                                                                                                                                                                                                                                                                                                                                                                                                   |
|---------------------------------|-----------------------------------------------------------------------------------------------------------------------------------------------------------------------------------------------------------------------------------------------------------------------------------------------------------------------------------------------------------------------------------------------------------------------------------------------------------------------------------------------------------------------------------------------------------------------------------------------------------------------------------------------------------------------------------------------------------------------------------------------------------------------------------------------------------------------------------------------------------------------------------------------------------------------------------------------------------------------------------------------------------------------------------------------------------------------------------|
| Journal:                        | <i>BMJ Open</i>                                                                                                                                                                                                                                                                                                                                                                                                                                                                                                                                                                                                                                                                                                                                                                                                                                                                                                                                                                                                                                                                   |
| Manuscript ID                   | bmjopen-2018-028633.R2                                                                                                                                                                                                                                                                                                                                                                                                                                                                                                                                                                                                                                                                                                                                                                                                                                                                                                                                                                                                                                                            |
| Article Type:                   | Original research                                                                                                                                                                                                                                                                                                                                                                                                                                                                                                                                                                                                                                                                                                                                                                                                                                                                                                                                                                                                                                                                 |
| Date Submitted by the Author:   | 24-Aug-2019                                                                                                                                                                                                                                                                                                                                                                                                                                                                                                                                                                                                                                                                                                                                                                                                                                                                                                                                                                                                                                                                       |
| Complete List of Authors:       | Kazis, Lewis; Boston University School of Public Health, Department of Health Law, Policy and Management<br>Ameli, Omid; OptumLabs; Boston University School of Public Health, Department of Health Law, Policy and Management<br>Rothendler, James; Boston University School of Public Health, Department of Health Law, Policy and Management<br>Garrity, Brigid; Boston University School of Public Health, Department of Health Law, Policy and Management<br>Cabral, Howard; Boston University School of Public Health, Department of Biostatistics<br>McDonough, Christine; University of Pittsburgh School of Health and Rehabilitation Sciences<br>Carey, Kathleen; Boston University School of Public Health, Department of Health Law, Policy and Management<br>Stein, Michael; Boston University School of Public Health, Department of Health Law, Policy and Management<br>Sanghavi, Darshak; OptumLabs<br>Elton, David; OptumHealth<br>Fritz, Julie; University of Utah, Physical Therapy and Athletic Training<br>Saper, Robert; Boston University Medical Campus, |
| <b>Primary Subject Heading</b>: | General practice / Family practice                                                                                                                                                                                                                                                                                                                                                                                                                                                                                                                                                                                                                                                                                                                                                                                                                                                                                                                                                                                                                                                |
| Secondary Subject Heading:      | Addiction                                                                                                                                                                                                                                                                                                                                                                                                                                                                                                                                                                                                                                                                                                                                                                                                                                                                                                                                                                                                                                                                         |
| Keywords:                       | Opioid use, Back pain < ORTHOPAEDIC & TRAUMA SURGERY, PAIN MANAGEMENT, opioid                                                                                                                                                                                                                                                                                                                                                                                                                                                                                                                                                                                                                                                                                                                                                                                                                                                                                                                                                                                                     |
|                                 |                                                                                                                                                                                                                                                                                                                                                                                                                                                                                                                                                                                                                                                                                                                                                                                                                                                                                                                                                                                                                                                                                   |

SCHOLARONE™  
Manuscripts



An Observational Retrospective Study of the Association of Initial Health Care Provider for  
New-onset Low Back Pain with Early and Long-Term Opioid Use

Lewis E. Kazis, ScD<sup>1</sup>; Omid Ameli, MD, MPH.<sup>1,2,3</sup>; James Rothendler, MD<sup>1</sup>; Brigid Garrity,  
MS, MPH<sup>1</sup>; Howard Cabral, PhD<sup>4</sup>; Christine McDonough, PhD, PT<sup>5</sup>; Kathleen Carey, PhD<sup>1</sup>;  
Michael Stein, MD<sup>1</sup>; Darshak Sanghavi, MD<sup>3</sup>; David Elton, DC<sup>6</sup>; Julie Fritz, PhD, PT<sup>7</sup>; and  
Robert Saper, MD, MPH<sup>1,8</sup>.

Author Affiliations: 1. Boston University School of Public Health, Department of Health  
Law, Policy and Management, Boston, MA; 2. OptumLabs Visiting Scholar, OptumLabs,  
Cambridge, MA; 3. OptumLabs, Cambridge, MA; 4. Boston University School of Public  
Health, Department of Biostatistics, Boston, MA; 5. University of Pittsburgh School of  
Health and Rehabilitation Sciences, Pittsburgh, PA, 6. OptumHealth, Eden Prairie, MN 7.  
University of Utah, Department of Physical Therapy, Salt Lake City, UT. 8. Department of  
Family Medicine, Boston Medical Center, Boston, MA.

Corresponding Author: Lewis E. Kazis, Sc.D.  
Professor of Health Policy and Management  
Director, Health Outcomes Unit and Center for the Assessment of Pharmaceutical Practices  
(CAPP) (Est. 2000)  
Department of Health Law, Policy and Management  
Boston University School of Public Health  
715 Albany Street, Talbot 5 West (532)  
Boston MA. 02118  
Telephone: 617-358-2291  
[lek@bu.edu](mailto:lek@bu.edu)

**Word count:** Abstract: 292 words; Manuscript: 3,717 (including acknowledgements)

## Abstract

**Objective:** This study examined the association of initial provider treatment with early and long-term opioid use in a national sample of patients with new-onset low back pain (LBP).

**Design:** A retrospective cohort study of patients with new-onset LBP from 2008-2013.

**Setting:** The study evaluated outpatient and inpatient claims from patient visits, pharmacy claims, and inpatient and outpatient procedures with initial providers seen for new-onset LBP.

**Participants:** 216,504 individuals aged 18 or older across the United States who were diagnosed with new-onset LBP and were opioid-naïve were included. Participants had commercial or Medicare Advantage insurance.

**Exposures:** The primary independent variable is type of initial health care provider including physicians and conservative therapists (physical therapists, chiropractors, acupuncturists).

**Main Outcome Measures:** Short-term opioid use (within 30 days of the index visit) following new LBP visit and long-term opioid use (starting within 60 days of the index date and either 120 or more days' supply of opioids over 12 months, or 90 days or more supply of opioids and 10 or more opioid prescriptions over 12 months).

**Results:** Short-term use of opioids was 22%. Patients who received initial treatment from chiropractors or physical therapists had decreased odds of short and long-term opioid use compared to those who received initial treatment from primary care physicians (PCPs) [AOR (95% CI): 0.10 (0.09,0.10) and 0.15 (0.13,0.17) respectively]. Compared to PCP visits, initial chiropractic and physical therapy also were associated with decreased odds of long-term opioid use in a propensity-score matched sample [OR (95% CI): 0.21 (0.16, 0.27) and 0.29 (0.12, 0.69) respectively].

**Conclusions:** Initial visits to chiropractors or physical therapists is associated with substantially decreased early and long-term use of opioids. Incentivizing use of conservative therapists may be a strategy to reduce risks of early- and long-term opioid use.

### Strengths and Limitations of this Study

- This is a nationwide study comparing early and long term opioid use among patients with low back pain (LBP) who seek initial care from conservative therapists, physician specialists and primary care physicians.
- We go beyond investigating the odds of opioid use for a one-time LBP event, by examining associations with both early and long-term opioid use among patients with new-onset LBP.
- We provide a broader depiction of conservative therapy than prior studies, as we included chiropractors and acupuncturists, as well as other MD specialists.
- This study assesses the impact of state regulations of access to physical therapy on choice of initial provider.
- This is a claims based study; therefore, causation cannot be inferred, and different patient characteristics we could assess is limited.

## Introduction

Over the past decade, there has been an increase in opioid use in the United States, with over 12 million Americans reporting long-term opioid use or misuse in 2015.<sup>1-3</sup> The National Survey on Drug Use and Health reported over 42,000 prescription opioid-related deaths in 2016, with total estimated costs of prescription opioid use reaching \$78.5 billion.<sup>4,5</sup> One of the most common conditions for which opioids are prescribed is low back pain (LBP).<sup>2-4</sup> Several studies have reported that opioids are the most frequently prescribed medication for treatment of LBP,<sup>4,5</sup> and more than half of opioid users report having a history of back pain.<sup>6</sup> This frequency of opioid prescribing is particularly concerning given that LBP is one of the three most common conditions for which Americans seek medical care.<sup>2,7</sup>

Given the high prevalence of LBP, several treatment guidelines have been issued for treatment, and specifically discourage opioids to treat pain. The American College of Physicians (ACP) and the Centers for Disease Control (CDC) recommend non-pharmacologic treatments including exercise, physical therapy (PT), spinal manipulation, acupuncture, and massage.<sup>2,8</sup> These guidelines indicate that opioids should not be considered as a treatment option for LBP unless recommended treatments fail and if the benefits of their use outweigh the risk for the individual patient.<sup>2,8</sup> Prior to the release of these recommendations, physician visits for new-onset LBP were much more common than non-pharmacologic therapies like chiropractic care, PT, and acupuncture.<sup>8-11</sup>

Several studies have attempted to elucidate the predictors of opioid use among patients with LBP. Comparisons of the treatment patterns of primary care physicians (PCPs) and conservative therapists (defined as chiropractors, physical therapists, acupuncturists) suggest that the use of conservative therapies for LBP may decrease the likelihood of opioid use.<sup>9</sup> Despite

1  
2  
3 these findings, there has been little research comparing early and long-term opioid use among  
4 patients seeking initial care from various providers, including primary care physicians,  
5  
6 chiropractors, physical therapists, and acupuncturists as well as patients seeing orthopedic  
7  
8 surgeons, neurosurgeons and emergency physicians.<sup>12-14</sup> The purpose of this study is to examine  
9  
10 the association of type of initial provider with subsequent early and long-term opioid use in a  
11  
12 national sample of patients with new-onset LBP whose treatment could reasonably be managed  
13  
14 by non-pharmacologic therapy.  
15  
16  
17  
18

## 19 **Methods**

### 20 *Study Sample*

21  
22 We conducted a retrospective study of patients seen by a health care provider for new-  
23  
24 onset LBP management and who were opioid-naïve at the time of the initial visit (Boston  
25  
26 Medical Center IRB approval number: H-36499). We used de-identified administrative claims  
27  
28 data from the OptumLabs Data Warehouse (OLDW), which includes medical and pharmacy  
29  
30 claims, laboratory results, and enrollment records for commercial and Medicare Advantage  
31  
32 (MA) enrollees. The database contains longitudinal health information on enrollees and patients,  
33  
34 representing a diverse mixture of ages, ethnicities and geographical regions across the United  
35  
36 States.  
37  
38  
39  
40  
41

42 The various health plans individuals were enrolled in all provide comprehensive  
43  
44 insurance coverage for physician, hospital, and prescription drug services.  
45  
46

47 The index episode of LBP was identified using claims from 2008-2013 with additional  
48  
49 claims data covering 2006-2015 to ascertain pre-index visit opioid use and low back conditions  
50  
51 and to allow a follow-up period. Patients needed to be continuously enrolled for at least 24  
52  
53 months both before and following the index date (total 48 months) with both medical and  
54  
55  
56  
57  
58  
59  
60

1  
2  
3 pharmacy claims data available during that period. The study sample included adults aged 18  
4  
5 years or older with a new outpatient diagnosis of LBP who had commercial or Medicare  
6  
7 Advantage insurance.  
8  
9

10 To qualify, LBP diagnosis appeared in the first location on a patient's index date  
11  
12 insurance claim. New-onset LBP was defined as no diagnosis of LBP or back procedures,  
13  
14 including spinal surgery, spinal injections, and spinal nerve stimulators during the 12-month  
15  
16 period prior to the index event (Figure 1). Given the heterogeneity of claims data in a  
17  
18 commercial insured population, we constructed our inclusion and exclusion criteria with the  
19  
20 specific purpose of maximizing the likelihood that our analytic sample comprised our target  
21  
22 population.  
23  
24

#### 25 26 *Exclusion Criteria*

27  
28 Patients were excluded if they had 1) a prescription for opioids in the 12 months prior to  
29  
30 the index event (see Appendix 1a for a list of opioids included), 2) a diagnosis of neoplasia in  
31  
32 this 12-month period or within a 3-month period after the index LBP event, or 3) a LBP-related  
33  
34 diagnoses that would typically not be amenable to conservative therapy in the 3 months on or  
35  
36 following the index date (See Appendix 1b-d for ICD-9 and CPT Codes for Inclusion/Exclusion  
37  
38 Critiera). Each patient was only included in the study once.  
39  
40  
41

#### 42 *Dependent variables*

43  
44 Early opioid use was defined as an opioid fill within 30 days of the index visit. Long-  
45  
46 term use was defined as an initial opioid fill within 60 days of the index date and either 120 or  
47  
48 more days' supply of opioids over 12 months, or 90 days or more supply of opioids and 10 or  
49  
50 more opioid prescriptions over 12 months. This definition relied on previous literature.<sup>6,15</sup>  
51  
52

#### 53 *Independent variables*

54  
55  
56  
57  
58  
59

### *Patient characteristics*

We identified patient characteristics and comorbidities using ICD-9 codes for the claims data in the two years prior to the index event. Characteristics included age, sex/gender, race/ethnicity, insurance (commercial or Medicare Advantage), and state of residence (which was mapped to one of 4 United States census regions: Northeast, South, Midwest and West). Race and ethnicity are defined as Black, Hispanic, Asian, or White (Table 1). Sex/gender is determined based on enrollment records. Ethnicity was assigned by an external vendor based on a structured, rule-based system that combines analysis of first names, middle names, surnames, and surname prefixes and suffixes, with geographic reference files. Values were then categorized to comply with data de-identification requirements. Physical comorbidities were assessed using a modification of the Elixhauser index<sup>15</sup> in which mental health conditions were excluded. Other comorbidities, listed in Table 2, included 8 mental health conditions and a condition comprising chronic pain, fibromyalgia and fatigue. The latter conditions were included based on prior studies that have reported an association between such conditions and opioid use<sup>16,17</sup> and their specifications were based on the Centers for Medicare and Medicaid Services Chronic Conditions Data Warehouse.<sup>18</sup>

Based on the index claim date of patients with an eligible LBP diagnosis, initial providers were characterized as physical therapist, chiropractor, acupuncturist, primary care physician, orthopedic surgeon, emergency medicine physician, neurosurgeon, radiologists, other non-physicians (physician assistant or nurse practitioners), or physical medicine and rehabilitation physician according to provider specialty and procedure codes. If a patient saw both a physician and a conservative therapist on the index date, the initial provider was assumed to be the physician, although this was notably a small number of individuals (n=262).

1  
2  
3 Patient access to PT in every state was classified as either ‘limited’, ‘provisional’, or  
4  
5 ‘unrestricted’, based on the three levels of patient access outlined by the American Physical  
6  
7  
8  
9  
10  
11  
12  
13  
14  
15  
16  
17  
18  
19  
20  
21  
22  
23  
24  
25  
26  
27  
28  
29  
30  
31  
32  
33  
34  
35  
36  
37  
38  
39  
40  
41  
42  
43  
44  
45  
46  
47  
48  
49  
50  
51  
52  
53  
54  
55  
56  
57  
58  
59  
60  
Patient access to PT in every state was classified as either ‘limited’, ‘provisional’, or  
‘unrestricted’, based on the three levels of patient access outlined by the American Physical  
Therapy Association.<sup>19</sup> To access PT for their initial LBP visit in limited access states, patients  
must have a prior relevant medical diagnosis, a recent diagnosis from a physician or other  
specified clinician, and/or a prior physician referral to PT. States with provisional access  
permitted patients to see physical therapists with some provisions that vary by state. Restrictions  
in provisional access states include time and/or visit limits and physician referrals for specific  
interventions. Patients in unrestricted states do not face these restrictions when seeking initial  
care from a physical therapist. There were six states with limited access to PT, 26 states with  
provisional access, and 18 states with unrestricted access to PT.<sup>19</sup>

### *Statistical Analyses*

The main analyses included multivariable logistic regressions with early opioid use and  
long-term opioid use as outcomes and entry-point provider as the main independent variable. The  
reference group for these comparisons was patients who visited PCP first for the LBP. All  
models were adjusted for age, sex/gender, race/ethnicity, geographic region, insurance type, the  
Elixhauser physical index as a continuous count of physical co-morbidities and, individually,  
mental health comorbidities.

As a supplemental alternative to adjusting for baseline confounding through regression  
adjustment, we invoked two-to-one propensity score matching (2 PCP: 1 physical therapist or 2  
PCP: 1 chiropractor) without replacement to achieve baseline covariate balance among patients  
who initially saw chiropractor first, saw a physical therapist first or who saw PCP first.<sup>20,21</sup> The  
propensity scores were calculated as predicted probabilities of chiropractor first and a physical  
therapist first as opposed to PCP first as a function of the following matching variables: age,



1  
2  
3 sex/gender, race/ethnicity, baseline comorbidities, geographic region, calendar year of the index  
4 visit, copay, deductible, plan type, history of pregnancy within 12 months, history of vehicular  
5 accidents within 12 months, history of opioid use within the year prior to the opioid free period,  
6 LBP diagnoses in the 13-24 months prior to the index visit, and prior PT visits. The propensity  
7 score for PT also considered the state PT access category, but the chiropractor propensity score  
8 did not. We examined the covariate balance in the matched samples through the standardized  
9 mean differences of each covariate. Finally, we applied a logistic model using the matched  
10 sample to assess the association between chiropractor compared to PCP as the initial provider  
11 seen and PT compared to PCP as the initial provider seen with the outcomes early term opioid  
12 use and separately long-term opioid use (binary variables). The caliper for propensity matching  
13 was set to 0.001 for both PT and chiropractor models.  
14  
15  
16  
17  
18  
19  
20  
21  
22  
23  
24  
25  
26  
27

28 In stage one of the propensity analysis, multivariable odds of initial chiropractic care and  
29 initial physical therapist versus initial PCP as a function of baseline covariates were measured.  
30 Covariates measured include age, sex/gender, race, geographic region, all mental and physical  
31 comorbidities included in the previous models, pregnancy and motor vehicle accidents in the 12  
32 months prior to the LBP visit, opioid use in the 13-24 months prior to the LBP index visit, PT,  
33 chiropractic care, and acupuncture in the 24 months prior to the LBP visit, and year of index  
34 visit. PT state access was only used for the PT vs PCP propensity analysis.  
35  
36  
37  
38  
39  
40  
41  
42  
43  
44

45 For all logistic models, we calculated adjusted odds ratios with 95% Wald confidence  
46 intervals. We also evaluated overall model fit, model discrimination (C statistic) and calibration  
47 (Hosmer Lemeshow test) for all logistic models (Appendix 2). While the Hosmer Lemeshow  
48 models were significant, this was likely due to the large sample sizes used for this study. The  
49 differences between the observed and expected values within the decile groups was relatively  
50  
51  
52  
53  
54  
55  
56  
57  
58  
59  
60

1  
2  
3 small suggesting credible calibration of the models and statistical significance due to the large  
4 sample sizes.<sup>22,23</sup> We further validated the covariate-adjusted ORs of early use and long-term use  
5 as a function of initial provider using the bootstrap method.<sup>24</sup> The resampling rate was 200 with a  
6 two-third/one-third sampling ratio. The bootstrapped estimates were then used to construct  
7 means and 95% confidence intervals for the ORs.  
8  
9  
10  
11  
12  
13

#### 14 *Patient and Public Involvement*

15 No patient involvement.  
16  
17  
18

#### 19 **Results**

20  
21 A total of 8,797,787 patients had a visit with a provider for LBP during the study period,  
22 and 216,504 met all inclusion/exclusion criteria (Figure 1). More than half the patients initially  
23 saw a PCP (n=114,782, 53.0%), and the most frequent initial conservative provider seen was  
24 chiropractor (50,041, 23.1%) followed by physical therapist 3,499 (1.6%) and acupuncturist  
25 1,839 (0.8%). Patient demographics by initial provider are shown in Table 1. Most patients had  
26 commercial insurance (183,117, 84.7%); the remainder had Medicare Advantage coverage. Of  
27 patients with an acupuncturist as the initial provider type, nearly all (99.3%) had commercial  
28 insurance. For all other initial provider types, 87-89% of patients had commercial insurance.  
29  
30 Approximately 18% of patients received an opioid fill within 3 days of the initial LBP visit, 22%  
31 received such a fill within the first 30 days and 1.2% met criteria for long-term use. 18% of  
32 patients received short-acting opioids (e.g., oxycodone, hydrocodone, codeine). 17.4% received  
33 prescriptions for NSAIDs.” The choice of initial provider varied by state PT access category.  
34  
35 For example, in limited access states, 55.2% of initial providers were PCP, 0.9% were physical  
36 therapists, and 25.7% were chiropractors. In provisional access states, the rates were 51.7% for  
37  
38  
39  
40  
41  
42  
43  
44  
45  
46  
47  
48  
49  
50  
51  
52  
53  
54  
55  
56  
57  
58  
59  
60

1  
2  
3 PCPs, 1.6% for physical therapists, and 23.2% for chiropractors, and in unrestricted access  
4  
5 states, the rates were 55.8% for PCPs, 2.6% for physical therapists, and 22.6% for chiropractors.  
6  
7

8 Initial provider was associated with early and long-term opioid use outcomes in the  
9  
10 adjusted multivariate models (Table 2). Compared to seeing a PCP as initial provider, patients  
11  
12 who first saw conservative therapists (chiropractor, acupuncturists and physical therapists) all  
13  
14 had significantly decreased odds of both early and long-term opioid use. For early opioid use,  
15  
16 patients initially visiting chiropractors had 90% decreased odds [95% CI: (0.09,0.10)] while  
17  
18 those visiting an acupuncturists had 91% decreased odds [95% CI: (0.07,0.12)] and those  
19  
20 visiting physical therapists had 85% decreased odds [95% CI: (0.13,0.17)]. Chiropractors,  
21  
22 acupuncturists and physical therapists all had major decreased odds of long term opioid use  
23  
24 compared to those who initially saw PCPs (0.22, 95% CI: (0.18,0.26); 0.07, 95% CI: (0.01,0.48);  
25  
26 0.27, 95% CI: (0.15,0.48) respectively). Compared to PCPs, orthopedic surgeons, neurosurgeons  
27  
28 and rehab physicians as initial providers decreased patients' odds of early opioid use (0.63, 95%  
29  
30 CI: (0.60,0.67); 0.58, 95% CI: (0.47,0.71); 0.54, 95% CI: (0.49,0.59), respectively), while  
31  
32 patients seeing emergency physicians initially had significantly increased odds of early opioid  
33  
34 use (2.66, 95% CI: (2.54,2.78)). However, compared to PCP as first provider, odds for long-  
35  
36 term opioid use were no longer significantly different for orthopedic surgeons, neurosurgeons,  
37  
38 and emergency physicians (1.10, 95% CI: (0.92,1.30); 1.50, 95% CI: (0.88,2.58); 0.92, 95% CI:  
39  
40 (0.77,1.10), respectively), but were significantly increased for rehab physicians (1.78, 95% CI:  
41  
42 (1.40,2.26)). (Table 2). The estimates reported using bootstrapping methods indicated little or no  
43  
44 differences with the actual results (Appendix 3 and 4).  
45  
46  
47  
48  
49  
50  
51  
52  
53  
54  
55  
56  
57  
58  
59  
60

1  
2  
3 Patients with anxiety, bipolar disorder, and depression had significantly increased odds of  
4 long-term opioid use, as did those diagnosed with drug use disorders and fibromyalgia/chronic  
5 pain/fatigue (Table 2).  
6  
7

8  
9  
10 Propensity-score matched odds of long-term opioid use were significantly lower for  
11 chiropractic care first compared to PCP first and for PT first as compared to PCP first with odds  
12 ratios consistent with findings in our primary covariate-adjusted logistic models (detailed results  
13 presented in Appendix 5).  
14  
15

16  
17  
18  
19 *Multivariable odds of initial chiropractic care and initial PT versus initial PCP as a*  
20 *function of baseline covariates*  
21  
22

23  
24 Patients in states with provisional access to PT had 1.21 (95% CI: 1.05, 1.40) times the  
25 odds of seeing a physical therapist initially while patients in states with unrestricted access to PT  
26 had 1.67 (95% CI: 1.40, 1.98) times the odds of seeing a physical therapist initially all compared  
27 to patients in states with limited PT access (Appendix 6).  
28  
29  
30

### 31 **Discussion**

32  
33  
34  
35 Initial treatment from conservative therapists in those with LBP was associated with a  
36 marked decrease in the odds of early and long term opioid use. To our knowledge, this is one of  
37 the first national studies to compare early and long term opioid use among patients with LBP  
38 who receive care from conservative therapists, physician specialists and PCPs. Although the  
39 impact of unmeasured confounders cannot be ruled out in this retrospective observational cohort  
40 study, the findings warrant careful consideration.  
41  
42  
43  
44  
45  
46  
47  
48

49 Several factors may help explain the apparent protective effect of conservative therapists.  
50 Since non-physicians are unable to prescribe opioids, patients seeking conservative therapy do  
51 not receive opioid prescriptions at the index visit, and subsequent visits to an MD would be  
52  
53  
54  
55  
56  
57  
58  
59

1  
2  
3 required to obtain such prescriptions. There may be selection bias among patients choosing to  
4 seek initial treatment from conservative therapists, and such biases could be related to  
5 educational level or preferences which may also result in decreased desire for those patients to  
6 use opioids. Additionally, the conservative therapy provided may result in decreased pain and  
7 improved back-related function so that patients do not need or seek opioid medications. A growing  
8 body of evidence suggest that spinal manipulation, massage, acupuncture, and superficial heat are effective for  
9 reducing acute low back pain intensity and improving function.<sup>23,25</sup> The conservative therapists studied in  
10 this analysis can incorporate one or more of these approaches: physical therapist (manipulation,  
11 massage, heat), chiropractor (manipulation, massage, heat), and acupuncturist (acupuncture,  
12 massage).<sup>23</sup> Therefore and importantly, early engagement of conservative therapists may  
13 decrease initial opioid prescriptions in association with MD visits by providing the opportunity  
14 to incorporate evidence-based non-pharmacological interventions.

15  
16  
17  
18  
19  
20  
21  
22  
23  
24  
25  
26  
27  
28  
29  
30  
31 Notably, state access to PT had a considerable association with choice of initial provider.  
32 Compared to states with limited access to PT, patients in states with unrestricted and provisional  
33 access had 67% and 21% higher odds of visiting physical therapists initially, respectively. Given  
34 that initial PT is associated with significant reductions in early and long-term opioid use, these  
35 observations are potentially important.

36  
37  
38  
39  
40  
41  
42  
43 The discrepancy between early and long-term use among PCPs and physicians specialists  
44 is also interesting. While patients who initially see orthopedic surgeons, neurosurgeons,  
45 rehabilitation physicians, and other physicians have significantly lower odds of early opioid use  
46 compared to PCPs, patients who initially see these physicians have similar or increased odds of  
47 long-term opioid use compared to PCPs. While we do not have a measure of pain severity, we  
48 hypothesize that physician specialists are trying to avoid prescribing opioids at the index visit,  
49  
50  
51  
52  
53  
54  
55  
56  
57  
58  
59  
60

1  
2  
3 but if patients return at follow-up due to persistent pain, physicians are likely to prescribe  
4  
5 opioids.  
6

### 7 *Comparisons to prior studies*

8  
9  
10 Our results are consistent with prior studies showing high rates of opioid prescription fills  
11 for patients with LBP who were seen by emergency department physicians.<sup>3,26</sup> While there are  
12 very few studies suggesting that PT and chiropractic care are used in emergency departments in  
13 the United States<sup>27</sup>, other countries have successfully introduced physical therapists into  
14 emergency departments to treat patients with LBP.<sup>28-30</sup>

15  
16  
17  
18  
19  
20  
21  
22 Certain comorbidities were also associated with increased odds of opioid use. Patients  
23 with fibromyalgia, chronic pain, and fatigue and those with certain psychiatric conditions,  
24 including anxiety, bipolar disorder, and depression had greater odds of long-term opioid use than  
25 patients without these disorders. This is consistent with recent evidence suggesting that adults  
26 with mental health conditions account for half of opioid prescriptions in the United States.<sup>31</sup>

27  
28  
29  
30  
31  
32  
33 A recent study by Frogner et al. also found that LBP patients who saw physical therapists  
34 initially had lower opioid use, although this study only focused on six states.<sup>13</sup> Another recent  
35 study by Hayward et al. evaluated the use of non-opioid treatments from various providers,  
36 including physical therapists and physicians, however this was a descriptive study across only 16  
37 states.<sup>32</sup> Our study examines the association of conservative therapy on opioid use with a  
38 sample that is national in scope. We also provide a broader depiction of conservative therapy, as  
39 we included chiropractors and acupuncturists in addition to physical therapists, as well as other  
40 MD specialists. Importantly, we find that conservative therapists other than physical therapists,  
41 including chiropractors and acupuncturists, when seen first after a new episode of LBP are  
42 apparently protective of early and long term use of opioids when compared with PCP's. Finally,  
43  
44  
45  
46  
47  
48  
49  
50  
51  
52  
53  
54  
55  
56  
57  
58  
59  
60

1  
2  
3 we go beyond investigating the odds of opioid use for a one-time LBP event, by examining  
4 associations with both early and long-term opioid use among patients with new-onset LBP, using  
5 rigorous definitions of recent onset.  
6  
7  
8  
9

10 Fritz et al. found that early PT was associated with decreased opioid prescriptions<sup>33</sup>, and a  
11 review by Ojha et al. noted that early PT as treatment for musculoskeletal disorders was  
12 associated with decreased frequency of opioid prescriptions, although this was based on a limited  
13 number of outcomes.<sup>34</sup> Thackerary et al. also suggested that the odds of receiving an opioid  
14 prescription among Medicaid beneficiaries were reduced for those who had a PT consult, as  
15 compared to those who did not.<sup>35</sup> While these studies did not measure the odds of opioid use  
16 among patients who initially saw physical therapists compared to other initial providers, our  
17 results are consistent with previously published reports that PT is associated with lower odds of  
18 opioid use.  
19  
20  
21  
22  
23  
24  
25  
26  
27  
28  
29

### 30 *Limitations*

31  
32  
33 There are several limitations to this study. Analysis was conducted using claims data,  
34 limiting our generalizability beyond commercial and Medicare Advantage enrolled patients.  
35 However, the sample is national in scope and provides a range of sociodemographic and clinical  
36 characteristics. The observational nature of the study and the use of claims data limited our  
37 ability to eliminate the influence of unmeasured confounders. In particular, confounding by  
38 indication may bias our results. Patients who seek early treatment with non-pharmacologic  
39 practitioners may be more likely to have mild back pain that does not require more aggressive  
40 treatment such as opioids, compared to individuals with more severe back pain who may be more  
41 likely to see practitioners able to prescribe opioids. Studies have suggested that those with more  
42 severe LBP are more likely to receive opioids,<sup>36</sup> and if patients with less severe pain were more  
43  
44  
45  
46  
47  
48  
49  
50  
51  
52  
53  
54  
55  
56  
57  
58  
59  
60

1  
2  
3 likely to choose conservative therapists rather than physicians, this could contribute to  
4  
5 overestimation of the protective effect of conservative therapy on opioid use. Several prior  
6  
7 studies have shown comparable baseline pain scores for those who choose conservative  
8  
9 therapists compared to those who choose to see physicians initially, however it is important to  
10  
11 note that these studies had different patient populations than this study as they were conducted  
12  
13 either only in one state or in countries other than the United States.<sup>36-40</sup> Other unmeasured  
14  
15 confounders may include patient preferences and behavioral characteristics. For example, those  
16  
17 who chose conservative therapists as initial providers for LBP may have preferences to  
18  
19 avoid pharmacological and/or opioid therapy. Therefore, while the associations between initial  
20  
21 health care providers for LBP and subsequent opioid therapy found in our analyses have  
22  
23 potentially important implications, one cannot infer causality due to the observational  
24  
25 retrospective nature of the study.  
26  
27  
28  
29

### 30 31 *Policy Implications and Future Research*

32  
33 In conclusion, our results suggest that use of conservative therapists as initial providers  
34  
35 for new-onset LBP are associated with lower odds of early and long-term use of opioids  
36  
37 compared with PCPs. Further research in other settings and prospective pragmatic trials will be  
38  
39 useful to confirm our findings and to better understand other factors that influence choice of  
40  
41 initial providers for LBP. Future research should include personal factors such as preferences  
42  
43 related to opioid use, and medical, non-medical and specialists as initial providers. Factors  
44  
45 related to health plan benefit design such as out-of-pocket costs for treatment alternatives (e.g.  
46  
47 PT and chiropractor visits, opioids) and impact of gatekeeper requirements on care patterns  
48  
49 should be investigated.  
50  
51  
52

### 53 54 *Contributorship statement*



1  
2  
3 Drs. Kazis, Rothendler, Ameli, Cabral, McDonough, Carey, and Saper were responsible for  
4 project design and conceptualization. Drs. Ameli and Cabral were responsible for data analysis.  
5 Drs. Kazis, Rothendler, Ameli, Cabral, McDonough, Carey, Saper, and Stein and Ms. Garrity  
6 were responsible for writing of the manuscript. Drs. Sanghavi, Elton, and Fritz provided critical  
7 feedback during the analysis and writing of the manuscript. All authors were involved in the  
8 editing and review of the manuscript.  
9  
10

### 11 *Competing interests*

12  
13 Drs. Ameli, Sanghavi, and Elton work for OptumLabs but do not have any competing interests to  
14 report. This study was commissioned by Optum Labs and the American Physical Therapy  
15 Association (APTA). The funders provided comments on the production of the manuscript. The  
16 primary author, Dr. Kazis Professor at Boston University, had final editorial comment on the  
17 manuscript.  
18  
19

### 20 *Funding*

21  
22 This project was funded by the American Physical Therapy Association, OptumLabs, and  
23 UnitedHealthCare.  
24  
25

### 26 *Data sharing statement*

27  
28 Certain data from OptumLabs Data Warehouse may be available upon request.  
29

### 30 *Acknowledgements*

31  
32 We thank members of the OptumLabs steering committee for their feedback and advice on this  
33 project. We thank in particular: Henry Henk, PhD, OptumLabs and Pamela C. Hansen, PhD,  
34 OptumLabs. This research was supported by UnitedHealthcare and the American Physical  
35 Therapy Association. Neither institution had editorial control or influence for the final content  
36 of this paper.  
37  
38  
39  
40  
41  
42  
43  
44  
45  
46  
47  
48  
49  
50  
51  
52  
53  
54  
55  
56  
57  
58  
59  
60

## References

1. Hughes A, Williams M, Lipari R, Bose J. Prescription drug use and misuse in the United States: results from the 2015 National Survey on Drug Use and Health. 2016 September.
2. Dowell D, Haegerich TM, Chou R. CDC Guideline for Prescribing Opioids for Chronic Pain—United States, 2016. *Jama*. 2016;315(15):1624.
3. Shmagel A, Ngo L, Ensrud K, Foley R. Prescription Medication Use Among Community-Based U.S. Adults With Chronic Low Back Pain: A Cross-Sectional Population Based Study. *The Journal of Pain*. 2018;19(10):1104–12.
4. Opioid Overdose [Internet]. Centers for Disease Control and Prevention. Centers for Disease Control and Prevention; 2017 [cited 2018Nov6]. Available from: <https://www.cdc.gov/drugoverdose/data/statedeaths.html>
5. Gore M, Tai K-S, Sadosky A, Leslie D, Stacey BR. Use and Costs of Prescription Medications and Alternative Treatments in Patients with Osteoarthritis and Chronic Low Back Pain in Community-Based Settings. *Pain Practice*. 2012May;12(7):550–60.
6. Boudreau D, Von Korff M, Rutter CM, Saunders C, Ray GT, Sullivan M, et al. Trends in De-facto Long-term Opioid Therapy for Chronic NonCancer Pain. *Pharmacoepidemiology and Drug Safety*. 2009Dec;18(12): 1166–75.
7. Licciardone JC. The epidemiology and medical management of low back pain during ambulatory medical care visits in the United States. *Osteopathic Medicine and Primary Care*. 2008;2(1):11.
8. Qaseem A, Wilt TJ, McLean RM, Forciea MA. Noninvasive Treatments for Acute, Subacute, and Chronic Low Back Pain. *Annals of Internal Medicine*. 2017;166(7).

- 1  
2  
3 9. Fritz JM, Kim J, Dorius J. Importance of the type of provider seen to begin health care for a  
4 new episode low back pain: associations with future utilization and costs. *Journal of Evaluation*  
5  
6 in *Clinical Practice*. 2015;22(2):247–52.  
7  
8
- 9  
10 10. Cherkin DC, Deyo RA, Wheeler K, Ciol MA. Physician Variation in Diagnostic Testing for  
11  
12 Low Back Pain. Who You See Is What You Get. *Arthritis & Rheumatism*. 1994;37(1):15–22.  
13
- 14 11. Webster BS, Cifuentes M, Verma S, Pransky G. Geographic variation in opioid prescribing  
15  
16 for acute, work-related, low back pain and associated factors: A multilevel analysis. *American*  
17  
18 *Journal of Industrial Medicine*. 2009;52(2):162–71.  
19
- 20 12. Fritz JM, Cleland JA, Speckman M, Brennan GP, Hunter SJ. Physical Therapy for Acute  
21  
22 Low Back Pain. *Spine*. 2008;33(16):1800–5.  
23
- 24 13. Frogner BK, Harwood K, Andrilla CHA, Schwartz M, Pines JM. Physical Therapy as the  
25  
26 First Point of Care to Treat Low Back Pain: An Instrumental Variables Approach to Estimate  
27  
28 Impact on Opioid Prescription, Health Care Utilization, and Costs. *Health Services Research*.  
29  
30 2018;  
31  
32
- 33 14. Martin BC, Fan M-Y, Edlund MJ, Devries A, Braden JB, Sullivan MD. Long-Term Chronic  
34  
35 Opioid Therapy Discontinuation Rates from the TROUP Study. *Journal of General Internal*  
36  
37 *Medicine*. 2011;26(12):1450–7.  
38  
39
- 40 15. Elixhauser A, Steiner C, Harris DR, Coffey RM. Comorbidity Measures for Use with  
41  
42 Administrative Data. *Medical Care*. 1998;36(1):8–27.  
43  
44
- 45 16. Feingold D, Brill S, Goor-Aryeh I, Delayahu Y, Lev-Ran S. The association between severity  
46  
47 of depression and prescription opioid misuse among chronic pain patients with and without  
48  
49 anxiety: A cross-sectional study. *Journal of Affective Disorders*. 2018;235:293–302.  
50  
51  
52  
53  
54  
55  
56  
57  
58  
59

- 1  
2  
3 17. Goesling J, Henry MJ, Moser SE, Rastogi M, Hassett AL, Clauw DJ, et al. Symptoms of  
4 Depression Are Associated With Opioid Use Regardless of Pain Severity and Physical  
5 Functioning Among Treatment-Seeking Patients With Chronic Pain. *The Journal of Pain*.  
6 2015;16(9):844–51.  
7  
8  
9  
10  
11  
12 18. Chronic Condition Data Warehouse. Centers for Medicare and Medicaid Services.  
13 <https://www.ccwdata.org/web/guest/condition-categories>  
14  
15  
16  
17 19. Levels of Patient Access to Physical Therapist Services in the States [Internet]. American  
18 Physical Therapy Association; 2016. Available from:  
19 [https://www.apta.org/uploadedFiles/APTAorg/Advocacy/State/Issues/Direct\\_Access/DirectAcce](https://www.apta.org/uploadedFiles/APTAorg/Advocacy/State/Issues/Direct_Access/DirectAccessbyState.pdf)  
20 [ssbyState.pdf](https://www.apta.org/uploadedFiles/APTAorg/Advocacy/State/Issues/Direct_Access/DirectAccessbyState.pdf)  
21  
22  
23  
24  
25  
26 20. Stuart, E. A., King, G., Imai, K., & Ho, D. E. (2011). MatchIt: nonparametric preprocessing  
27 for parametric causal inference. *Journal of Statistical Software*, 42(8).  
28  
29  
30  
31 21. Dehejia, R. H., & Wahba, S. (2002). Propensity score-matching methods for  
32 nonexperimental causal studies. *Review of Economics and statistics*, 84(1), 151-161.  
33  
34  
35 22. Feudtner C, Hexem KR, Shabbout M, Feinstein JA, Sochalski J, Silber JH. Prediction of  
36 Pediatric Death in the Year after Hospitalization: A Population-Level Retrospective Cohort  
37 Study. *Journal of Palliative Medicine*. 2009;12(2):160–9.  
38  
39  
40  
41  
42 23. Chou R, Deyo R, Friedly J, Skelly A, Hashimoto R, Weimer M, et al. Nonpharmacologic  
43 Therapies for Low Back Pain: A Systematic Review for an American College of Physicians  
44 Clinical Practice Guideline. *Ann Intern Med*. 2017 Apr 4;166(7):493-505. doi: 10.7326/M16-  
45 2459. Epub 2017 Feb 14. Review. PMID: 28192793  
46  
47  
48  
49  
50  
51 24. Jackknife and Bootstrap Analyses. 2010 [cited 2018Nov6]. Available from:  
52 <http://support.sas.com/kb/24/982.html>  
53  
54  
55  
56  
57  
58  
59  
60

- 1  
2  
3 25. Chou R, Huffman LH. Nonpharmacologic Therapies for Acute and Chronic Low Back Pain:  
4 A Review of the Evidence for an American Pain Society/American College of Physicians  
5  
6 A Review of the Evidence for an American Pain Society/American College of Physicians  
7  
8 Clinical Practice Guideline. *Annals of Internal Medicine*. 2007Feb;147(7):492.  
9
- 10 26. Cantrill SV, Brown MD, Carlisle RJ, Delaney KA, Hays DP, Nelson LS, et al. Clinical  
11  
12 Policy: Critical Issues in the Prescribing of Opioids for Adult Patients in the Emergency  
13  
14 Department. *Annals of Emergency Medicine*. 2012;60(4):499–525.  
15
- 16 27. Lebec MT, Jogodka CE. The Physical Therapist as a Musculoskeletal Specialist in the  
17  
18 Emergency Department. *Journal of Orthopaedic & Sports Physical Therapy*. 2009;39(3):221–9.  
19
- 20 28. Lau PM-Y, Chow DH-K, Pope MH. Early physiotherapy intervention in an Accident and  
21  
22 Emergency Department reduces pain and improves satisfaction for patients with acute low back  
23  
24 pain: a randomised trial. *Australian Journal of Physiotherapy*. 2008;54(4):243–9.  
25
- 26 29. Lebec MT, Jogodka CE. The Physical Therapist as a Musculoskeletal Specialist in the  
27  
28 Emergency Department. *Journal of Orthopaedic & Sports Physical Therapy*. 2009;39(3):221–9.  
29
- 30 30. Fleming-McDonnell D, Czuppon S, Deusinger SS, Deusinger RH. Physical Therapy in the  
31  
32 Emergency Department: Development of a Novel Practice Venue. *Physical Therapy*.  
33  
34 2010Jul;90(3):420–6.  
35
- 36 31. Davis M, Lin L, Liu H, Sites B. Prescription Opioid Use among Adults with Mental Health  
37  
38 Disorders in the United States. *The Journal of the American Board of Family Medicine*.  
39  
40 2017;30(4):407–17.  
41
- 42 32. Heyward J, Jones CM, Compton WM, Lin DH, Losby JL, Murimi IB, et al. Coverage of  
43  
44 Nonpharmacologic Treatments for Low Back Pain Among US Public and Private Insurers.  
45  
46  
47  
48  
49  
50  
51  
52  
53  
54  
55  
56  
57  
58  
59  
60

- 1  
2  
3 33. Fritz JM, Childs JD, Wainner RS, Flynn TW. Primary care referral of patients with low back  
4 pain to physical therapy: impact on future health care utilization and costs. *Spine* .  
5  
6 2012Dec;37(25):2114–212.  
7  
8  
9  
10 34. Ojha HA, Wyrsta NJ, Davenport TE, Egan WE, Gellhorn AC. Timing of Physical Therapy  
11 Initiation for Nonsurgical Management of Musculoskeletal Disorders and Effects on Patient  
12 Outcomes: A Systematic Review. *Journal of Orthopaedic & Sports Physical Therapy*.  
13  
14 2016;46(2):56–70.  
15  
16  
17  
18 35. Thackeray A, Hess R, Dorius J, Brodke D, Fritz J. Relationship of Opioid Prescriptions to  
19 Physical Therapy Referral and Participation for Medicaid Patients with New-Onset Low Back  
20 Pain. *The Journal of the American Board of Family Medicine*. 2017;30(6):784–94.  
21  
22  
23  
24  
25 36. Larson, MJ, Adams, RS, Ritter, GA, Linton, A, Williams, TV, Saadoun, M, et al.  
26 Associations of Early Treatments for Low-Back Pain with Military Readiness Outcomes. *The*  
27  
28 *Journal of Alternative and Complementary Medicine* 2018 24:7, 666-676  
29  
30  
31  
32  
33 37. Carey TS, Evans AT, Hadler NM, Lieberman G, Kalsbeek WD, Jackman AM, et al. Acute  
34 Severe Low Back Pain. *Spine*. 1996;21(3):339–44.  
35  
36  
37  
38 38. Carey TS, Garrett J, Jackman A, McLaughlin C, Fryer J, Smucker DR. The Outcomes and  
39 Costs of Care for Acute Low Back Pain among Patients Seen by Primary Care Practitioners,  
40 Chiropractors, and Orthopedic Surgeons. *New England Journal of Medicine*.  
41  
42 1995May;333(14):913–7.  
43  
44  
45  
46 39. Houweling TA, Braga AV, Hausheer T, Vogelsang M, Peterson C, Humphreys BK. First-  
47 Contact Care With a Medical vs Chiropractic Provider After Consultation With a Swiss  
48  
49  
50  
51  
52  
53  
54  
55  
56  
57  
58  
59  
60

1  
2  
3 Spinal, Hip, and Shoulder Pain Patients. Journal of Manipulative and Physiological Therapeutics.  
4  
5 2015;38(7):477–83.  
6

7  
8 40. Walker BF, Muller R, Grant WD. Low Back Pain in Australian Adults. Health Provider  
9  
10 Utilization and Care Seeking. Journal of Manipulative and Physiological Therapeutics.  
11  
12 2004;27(5):327–35.  
13  
14  
15  
16  
17  
18  
19  
20  
21  
22  
23  
24  
25  
26  
27  
28  
29  
30  
31  
32  
33  
34  
35  
36  
37  
38  
39  
40  
41  
42  
43  
44  
45  
46  
47  
48  
49  
50  
51  
52  
53  
54  
55  
56  
57  
58  
59  
60

For peer review only

**Table 1:** Patient characteristics

|                        | Entry-point provider |                        |                              |                            |                |                              |                              |                            |                              |                           |
|------------------------|----------------------|------------------------|------------------------------|----------------------------|----------------|------------------------------|------------------------------|----------------------------|------------------------------|---------------------------|
|                        | Total                | Conservative Therapist |                              |                            | Physician      |                              |                              |                            |                              |                           |
|                        |                      | Chiropractor           | Physical Therapist           | Acupuncture                | Primary Care   | Orthopedic Surgeon           | Emergency Medicine           | MD Other                   | Rehab                        | Neurosurgeon              |
| Full Sample – N (%)    | 216,504 (100)        | 50,014 (23.1)          | 3,499 (1.6)                  | 1,839 (0.8)                | 114,782 (53.0) | 9,335 (4.3)                  | 8,746 (4.0)                  | 4,422 (2.0)                | 3,246 (1.5)                  | 578 (0.3)                 |
| Age, year – mean (STD) | 48.1 (15.9)          | 45.7 (14.9)            | 47.0 (15.7)                  | 42.4 (10.6)                | 47.7 (15.4)    | 50.1 (16.4)                  | 50.1 (18.3)                  | 51.3 (15.3)                | 46.9 (15.0)                  | 52.2 (14.8)               |
| Sex/Gender – N (%)     |                      |                        |                              |                            |                |                              |                              |                            |                              |                           |
| Female                 | 108,347 (50.1)       | 22,808 (45.6)          | 1,995 (57.1)                 | 972 (52.9)                 | 58,182 (50.7)  | 4,648 (49.8)                 | 4,560 (52.2)                 | 2,282 (51.6)               | 1,554 (47.9)                 | 245 (42.4)                |
| Male                   | 107,660 (49.8)       | 27,193 (54.4)          | >1,493 (>42.6) <sup>xx</sup> | >856 (>46.5) <sup>xx</sup> | 56,517 (49.2)  | 4,674 (50.1)                 | >4,175 (>47.7) <sup>xx</sup> | 2,140 (48.4)               | >1,681 (>51.8) <sup>xx</sup> | 333 (57.6)                |
| Race/ethnicity - N (%) |                      |                        |                              |                            |                |                              |                              |                            |                              |                           |
| Black                  | 18,907 (8.7)         | 2,190 (4.4)            | 191 (5.5)                    | 45 (2.4)                   | 11,755 (10.2)  | 802 (8.6)                    | 1,192 (13.6)                 | 494 (11.2)                 | 208 (6.4)                    | 50 (8.7)                  |
| Hispanic               | 20,936 (9.7)         | 3,766 (7.5)            | 263 (7.5)                    | 224 (12.2)                 | 12,212 (10.6)  | 752 (8.1)                    | 860 (9.8)                    | 541 (12.2)                 | 293 (9.0)                    | 38 (6.6)                  |
| Asian                  | 9,344 (4.3)          | 1,636 (3.3)            | 224 (6.4)                    | 747 (40.6)                 | 4,885 (4.3)    | 354 (3.8)                    | 270 (3.1)                    | 194 (4.4)                  | 218 (6.7)                    | 15 (2.6)                  |
| White                  | 159,503 (73.7)       | 40,709 (81.4)          | 2,666 (76.2)                 | 732 (39.8)                 | 81,971 (71.4)  | 7,046 (75.5)                 | 6,115 (69.9)                 | 3,013 (68.1)               | 2,394 (73.8)                 | 449 (77.7)                |
| Unknown (Missing)      | 7,814 (3.6)          | 1,713 (3.4)            | 155 (4.4)                    | 91 (4.9)                   | 3,959 (3.4)    | 381 (4.1)                    | 309 (3.5)                    | 180 (4.1)                  | 133 (4.1)                    | 26 (4.5)                  |
| Insurance - N (%)      |                      |                        |                              |                            |                |                              |                              |                            |                              |                           |
| Commercial             | 183,117 (84.7)       | 44,520 (89.0)          | 3,048 (87.1)                 | 1,827 (99.3)               | 99,842 (87.0)  | 7,696 (82.5)                 | 6,236 (71.3)                 | 3,601 (81.4)               | 2,891 (89.1)                 | 472 (81.7)                |
| Medicare Advantage     | 32,937 (15.2)        | 5,476 (11.0)           | >440 (>12.6) <sup>xx</sup>   | 12 (0.7)                   | 14,900 (13.0)  | > 1628 (>17.4) <sup>xx</sup> | >2,499 (>28.6) <sup>xx</sup> | >810 (>18.3) <sup>xx</sup> | >344 (>10.6) <sup>xx</sup>   | >95 (>16.4) <sup>xx</sup> |

**Table 1 Legend:** Age, sex/gender, race/ethnicity, and insurance are all statistically significant at  $p < 0.0001$ . <sup>xx</sup>: Cell suppressed due to small N's with unknown sex/gender or insurance in the corresponding column. Two additional initial type of providers – other non-MD (eg. Physician assistants, advance practice nurses) and radiologist - were included in the analyses but not reported in this table. Outcomes with a sample size  $< 11$  are not shown due to small sample size. There were a small number of individuals with unknown sex/gender and insurance type, and if we provided exact n's, readers may be able to infer the unknown n's which would be problematic since we cannot disclose  $n < 11$  for purposes of confidentiality of the data. For example, in Table 1 under Male PT, >1493 means that there was an unknown sex/gender row or column with  $n < 11$ . Therefore, the number of male PT first individuals is between 1,493 and 1,504.



**Table 2:** Odds of early and long-term opioid use by initial provider

|                  |                                          | Early use, OR (95% CI) | Long-term, OR (95% CI) |
|------------------|------------------------------------------|------------------------|------------------------|
| Initial provider | PT (N=3,499)                             | 0.15 (0.13,0.17)       | 0.27 (0.15,0.48)       |
|                  | DC (N=50,014)                            | 0.10 (0.09,0.10)       | 0.22 (0.18,0.26)       |
|                  | Acupuncture (N=1,839)                    | 0.09 (0.07,0.12)       | 0.07 (0.01,0.48)       |
|                  | Ortho (N=9,335)                          | 0.63 (0.60,0.67)       | 1.10 (0.92,1.30)       |
|                  | Emerg Med (N=8,746)                      | 2.66 (2.54,2.78)       | 0.92 (0.77,1.10)       |
|                  | Neurosgn (N=578)                         | 0.58 (0.47,0.71)       | 1.50 (0.88,2.58)       |
|                  | MD other (N=4,422)                       | 0.50 (0.46,0.54)       | 2.03 (1.70,2.41)       |
|                  | Rehab (N=3,246)                          | 0.54 (0.49,0.59)       | 1.78 (1.40,2.26)       |
| Age              | 45-64 vs 18-44                           | 1.07 (1.05,1.10)       | 1.32 (1.19,1.46)       |
|                  | 65-74 vs 18-44                           | 0.89 (0.82,0.97)       | 0.79 (0.54,1.15)       |
|                  | 75+ vs 18-44                             | 0.80 (0.72,0.89)       | 0.67 (0.45,1.00)       |
| Sex/Gender       | Female vs. male                          | 0.83 (0.81,0.85)       | 0.82 (0.76,0.89)       |
| Race             | Asian vs White                           | 0.49 (0.46,0.52)       | 0.29 (0.20,0.42)       |
|                  | Black vs White                           | 0.90 (0.87,0.94)       | 0.87 (0.76,0.99)       |
|                  | Hispanic vs White                        | 0.79 (0.76,0.82)       | 0.69 (0.59,0.81)       |
|                  | Unknown vs White                         | 0.84 (0.79,0.89)       | 0.65 (0.51,0.83)       |
| Region           | Midwest vs Northeast                     | 0.78 (0.75,0.81)       | 0.74 (0.64,0.87)       |
|                  | South vs Northeast                       | 1.11 (1.08,1.14)       | 1.22 (1.11,1.34)       |
|                  | West vs Northeast                        | 1.01 (0.97,1.04)       | 1.17 (1.02,1.34)       |
| Insurance type   | Medicare <65 y/o vs commercial insurance | 0.98 (0.89,1.08)       | 3.77 (3.19,4.46)       |
|                  | Medicare ≥65 y/o vs commercial insurance | 0.98 (0.89,1.08)       | 2.24 (1.54,3.26)       |
| Comorbidities    | Anxiety                                  | 1.05 (1.01,1.09)       | 1.46 (1.30,1.63)       |
|                  | Bipolar disorder                         | 1.11 (1.01,1.21)       | 1.41 (1.13,1.76)       |
|                  | Depression                               | 1.11 (1.07,1.15)       | 1.55 (1.39,1.73)       |
|                  | Dementia                                 | 0.80 (0.70,0.92)       | 0.99 (0.73,1.36)       |
|                  | ADHD                                     | 0.87 (0.80,0.95)       | 1.00 (0.75,1.32)       |
|                  | Alcohol use disorder                     | 1.08 (0.98,1.20)       | 1.28 (0.98,1.66)       |
|                  | Substance use disorder                   | 1.06 (0.93,1.22)       | 2.34 (1.76,3.10)       |
|                  | Fibromyalgia/Chronic Pain/Fatigue        | 0.96 (0.92,1.01)       | 1.92 (1.71,2.16)       |
|                  | PTSD                                     | 0.84 (0.69,1.03)       | 1.16 (0.77,1.77)       |
|                  | Psychotic disorder                       | 0.86 (0.74,0.99)       | 0.76 (0.55,1.05)       |
|                  | Elixhauser physical                      | 1.07 (1.06,1.08)       | 1.24 (1.21,1.27)       |

**Table 2 Legend:** The following variables were all included in the regression: Age, sex/gender, race/ethnicity, insurance, Elixhauser, which included physical comorbidities and mental health comorbidities. Primary care physician is the reference group (N=114,782); adjusted for race/ethnicity, sex/gender, region, and insurance type. PT: physical therapy; PCP: primary care physician; DC: chiropractor; Ortho: orthopedic surgeon; Emerg Med: emergency medicine physician; Neurosgn: neurosurgeon; MD other: other physician; Rehab: rehab physician. \*p<0.01. Two additional initial providers – other non-MD (eg. Physician assistants, advance practice nurses) and radiologist - were included in the analyses but not reported in this table.

1  
2  
3 **Figure 1 Legend:** Initially, 8,797,787 patients with low back pain (LBP) were identified.  
4 Patients with an insufficient clean period (LBP within the last 1 year), patients with a diagnosis  
5 of LBP that was not in the first position of their diagnosis, and LBP in only inpatient settings  
6 were excluded, reducing the number of patients to 4,263,713. Patients were excluded if they  
7 were not continuously enrolled in their insurance for 24 months before and after the initial LBP  
8 visit and if they were <18 years old, reducing the number of patients to 422,871. Patients with  
9 exclusionary conditions, LBP that was not limited to the low back, patients with back procedures  
10 in the 12 months prior to the index LBP visit, and patients with any opioid use in the 12 months  
11 before the index visit were excluded, leaving 216,504 patients in our sample.  
12  
13  
14  
15  
16  
17  
18  
19  
20  
21  
22  
23  
24  
25  
26  
27  
28  
29  
30  
31  
32  
33  
34  
35  
36  
37  
38  
39  
40  
41  
42  
43  
44  
45  
46  
47  
48  
49  
50  
51  
52  
53  
54  
55  
56  
57  
58  
59  
60

**Figure 1:** Inclusion and exclusion criteria

## Appendix 1: ICD-9 and CPT Codes for Inclusion/Exclusion Criteria

### Appendix 1a: Drugs classified as opioids

The following drugs were identified as opioids with over 10,000 NDC codes: Buprenorphine, Codeine, Dihydrocodeine, Fentanyl LA, Fentanyl SA, Hydrocodone LA, Hydrocodone SA, Hydromorphone LA, Hydromorphone SA, Levomethadyl, Levorphanol, Meperidine, Methadone, Morphine LA, Morphine SA, Naltrexone, Opium, Oxycodone LA, Oxycodone SA, Oxymorphone LA, Oxymorphone SA, Pentazocine, Propoxyphene, Tapentadol LA, Tapentadol SA, Tramadol LA, Tramadol SA.

For peer review only

## Appendix 1b: ICD-9 LBP Diagnoses Inclusion/Exclusion Criteria

| ICD-9 code | Description                                                                               | Include as location-specific LBP index diagnosis | Exclusion if in clean period prior to index diagnosis | Exclusion if on index date or within 3 months afterwards |
|------------|-------------------------------------------------------------------------------------------|--------------------------------------------------|-------------------------------------------------------|----------------------------------------------------------|
| 353.4      | Lumbosacral root lesions, not elsewhere classified                                        | x                                                | X                                                     |                                                          |
| 721.3      | Lumbosacral spondylosis without myelopathy                                                | x                                                | X                                                     |                                                          |
| 721.42     | Spondylosis with myelopathy, lumbar region                                                | x                                                | X                                                     |                                                          |
| 722.1      | Displacement of thoracic or lumbar intervertebral disc without myelopathy                 | x                                                | X                                                     |                                                          |
| 722.32     | Schmorl nodes, lumbar region                                                              | x                                                | X                                                     |                                                          |
| 722.51     | Degeneration of thoracic or lumbar intervertebral disc                                    | x                                                | X                                                     |                                                          |
| 722.52     | Degeneration of lumbar or lumbosacral intervertebral disc                                 | x                                                | X                                                     |                                                          |
| 722.93     | Other and unspecified disc disorder of lumbar region                                      | x                                                | X                                                     |                                                          |
| 724.2      | Lumbago                                                                                   | x                                                | X                                                     |                                                          |
| 724.3      | Sciatica                                                                                  | x                                                | X                                                     |                                                          |
| 724.4      | Thoracic or lumbosacral neuritis or radiculitis, unspecified                              | x                                                | X                                                     |                                                          |
| 724.5      | Unspecified backache                                                                      | x                                                | X                                                     |                                                          |
| 724.6      | Disorders of sacrum                                                                       | x                                                | X                                                     |                                                          |
| 739.3      | Non-allopathic lesion of lumbar region, not elsewhere classified                          | x                                                | X                                                     |                                                          |
| 739.4      | Non-allopathic lesion of sacral region, not elsewhere classified                          | x                                                | X                                                     |                                                          |
| 846.0      | Sprain and strain of lumbosacral (joint) (ligament)                                       | x                                                | X                                                     |                                                          |
| 846.1      | Sprain and strain of sacroiliac (ligament)                                                | x                                                | X                                                     |                                                          |
| 846.2      | Sprain and strain of sacrospinatus (ligament)                                             | x                                                | X                                                     |                                                          |
| 846.3      | Sprain and strain of sacrotuberous (ligament)                                             | x                                                | X                                                     |                                                          |
| 846.8      | Other specified sites of sacroiliac region sprain and strain                              | x                                                | X                                                     |                                                          |
| 846.9      | Unspecified site of sacroiliac region sprain and strain                                   | x                                                | X                                                     |                                                          |
| 847.2      | Lumbar sprain and strain                                                                  | x                                                | X                                                     |                                                          |
| 847.3      | Sprain and strain of sacrum                                                               | x                                                | X                                                     |                                                          |
| 847.4      | Sprain and strain of coccyx                                                               | x                                                | X                                                     |                                                          |
| 722.10     | Displacement of lumbar intervertebral disc without myelopathy                             | x                                                | X                                                     |                                                          |
| 722.73     | Intervertebral disc herniation Intervertebral disc disorder with myelopathy lumbar region | x                                                | X                                                     |                                                          |
| 724.02     | Spinal stenosis, lumbar region, without neurogenic claudication                           | x                                                | X                                                     |                                                          |
| 724.03     | Spinal stenosis, lumbar region, with neurogenic claudication                              | x                                                | X                                                     |                                                          |
| 756.11     | Spondylolysis, lumbosacral region (congenital)                                            | x                                                | X                                                     |                                                          |
| 721.5      | Kissing spine                                                                             |                                                  | X                                                     |                                                          |
| 721.6      | Ankylosing vertebral hyperostosis                                                         |                                                  | X                                                     |                                                          |
| 721.7      | Traumatic spondylopathy                                                                   |                                                  | X                                                     |                                                          |
| 721.8      | Other allied disorders of spine                                                           |                                                  | X                                                     |                                                          |

|               |                                                                       |  |   |   |
|---------------|-----------------------------------------------------------------------|--|---|---|
| 721.90        | Spondylosis of unspecified site without mention of myelopathy         |  | x |   |
| 721.91        | Spondylosis of unspecified site with myelopathy                       |  | x |   |
| 722.30        | Schmorl nodes, unspecified region                                     |  | x |   |
| 722.90        | Other and unspecified disc disorder of unspecified region             |  | x |   |
| 724.8         | Other symptoms referable to back                                      |  | x |   |
| 724.9         | Other unspecified back disorders                                      |  | x |   |
| 847.9         | Sprain and strain of unspecified site of back                         |  | x |   |
| 722.2         | Displacement of intervertebral disc, site unspecified, w/o myelopathy |  | x |   |
| 722.6         | Degeneration of intervertebral disc site unspecified                  |  | x |   |
| 724.00        | Spinal stenosis of unspecified region                                 |  | x |   |
| 724.09        | Spinal stenosis of other region                                       |  | x |   |
| 738.4         | Acquired spondylolisthesis                                            |  | x |   |
| 738.5         | Other acquired deformity of back or spine                             |  | x |   |
| 756.12        | Spondylolisthesis (congenital)                                        |  | x |   |
| 806.0-806.9   | Fracture of vertebral column with spinal cord injury                  |  | x | x |
| 805.0-805.9   | Fracture of vertebral column without mention of spinal cord injury    |  | x | x |
| 733.1x        | Pathologic fractures                                                  |  | x | x |
| 839.00-839.59 | Vertebral dislocations                                                |  | x | x |
| 720.0-720.9   | Inflammatory spondyloarthropathies                                    |  | x | x |
| 324.1         | Intraspinous abscess                                                  |  | x | x |
| 140-239.9     | Cancer/neoplasms                                                      |  | x | x |
| 730-730.99    | Osteomyelitis                                                         |  | x | x |
| 353.2         | Cervical root lesions, not elsewhere classified                       |  |   |   |
| 353.3         | Thoracic root lesions, not elsewhere classified                       |  |   |   |
| 721.0         | Cervical spondylosis without myelopathy                               |  |   |   |
| 721.1         | Cervical spondylosis with myelopathy                                  |  |   |   |
| 721.2         | Thoracic spondylosis without myelopathy                               |  |   |   |
| 721.41        | Spondylosis with myelopathy, thoracic region                          |  |   |   |
| 722.0         | Displacement of cervical intervertebral disc without myelopathy       |  |   |   |
| 722.11        | Displacement of thoracic intervertebral disc without myelopathy       |  |   |   |
| 722.4         | Degeneration of cervical intervertebral disc                          |  |   |   |
| 722.71        | Intervertebral disc disorder with myelopathy, cervical region         |  |   |   |
| 722.72        | Intervertebral disc disorder with myelopathy, thoracic region         |  |   |   |
| 722.81        | Postlaminectomy syndrome, cervical region                             |  |   |   |
| 722.82        | Postlaminectomy syndrome, thoracic region                             |  |   |   |
| 722.91        | Other and unspecified disc disorder, cervical region                  |  |   |   |
| 722.92        | Other and unspecified disc disorder, thoracic region                  |  |   |   |
| 723.0         | Spinal stenosis in cervical region                                    |  |   |   |

1  
2  
3  
4  
5  
6  
7  
8  
9  
10  
11  
12  
13  
14  
15  
16  
17  
18  
19  
20  
21  
22  
23  
24  
25  
26  
27  
28  
29  
30  
31  
32  
33  
34  
35  
36  
37  
38  
39  
40  
41  
42  
43  
44  
45  
46  
47  
48  
49  
50  
51  
52  
53  
54  
55  
56  
57  
58  
59  
60

|        |                                      |  |  |  |
|--------|--------------------------------------|--|--|--|
| 723.4  | Brachial neuritis or radiculitis NOS |  |  |  |
| 724.01 | Spinal stenosis, thoracic region     |  |  |  |

For peer review only

**Appendix 1c: ICD-9 Procedures for Exclusion Criteria**

| <b>ICD-9 code</b> | <b>Description</b>                                                                               |
|-------------------|--------------------------------------------------------------------------------------------------|
| 03.01             | Removal Of Foreign Body From Spinal Canal                                                        |
| 03.02             | Reopening Of Laminectomy Site                                                                    |
| 03.09             | Other Exploration And Decompression Of Spinal Cana                                               |
| 03.1              | Division Of Intraspinal Nerve Root                                                               |
| 03.2x             | chordotomy                                                                                       |
| 03.4              | Excision Or Destruction Of Lesion Of Spinal Cord Or Spinal Meninges                              |
| 03.5x             | Plastic Operations On Spinal Cord Structures (multiple subcat.)                                  |
| 03.6              | Lysis Of Adhesions Of Spinal Cord And Nerve Roots                                                |
| 03.7              | Shunt Of Spinal Theca                                                                            |
| 03.8              | Injection Of Destructive Agent Into Spinal Canal                                                 |
| 03.93             | Insert/Replace Spinal Neurostimulator                                                            |
| 03.94             | Removal Of Spinal Neurostimulator                                                                |
| 03.97             | Revision Of Spinal Thecal Shunt                                                                  |
| 03.98             | Removal Of Spinal Thecal Shunt                                                                   |
| 80.50             | Excision Or Destruction Of Intervertebral Disc, Unspecified                                      |
| 80.51             | Excision Of Intervertebral Disc                                                                  |
| 80.52             | Intervertebral Chemonucleolysis                                                                  |
| 80.53             | Repair Of The Anulus Fibrosus With Graft Or Prosthesis                                           |
| 80.54             | Other And Unspecified Repair Of The Anulus Fibrosus                                              |
| 80.59             | Other Destruction Of Intervertebral Disc                                                         |
| 81.00             | Spinal Fusion, Not Otherwise Specified                                                           |
| 81.01             | Atlas-Axis Spinal Fusion                                                                         |
| 81.02             | Other Cervical Fusion Of The Anterior Column, Anterior Technique                                 |
| 81.03             | Other Cervical Fusion Of The Posterior Column, Posterior Technique                               |
| 81.04             | Dorsal And Dorsolumbar Fusion Of The Anterior Column, Anterior Technique                         |
| 81.05             | Dorsal And Dorsolumbar Fusion Of The Posterior Column, Posterior Technique                       |
| 81.06             | Lumbar And Lumbosacral Fusion Of The Anterior Column, Anterior Technique                         |
| 81.07             | Lumbar And Lumbosacral Fusion Of The Posterior Column, Lateral Transverse Process Technique      |
| 81.08             | Lumbar And Lumbosacral Fusion Of The Anterior Column, Posterior Technique                        |
| 81.09             | Other spinal fusion ? No longer in use?                                                          |
| 81.30             | Refusion Of Spine, Not Otherwise Specified                                                       |
| 81.31             | Refusion Of Atlas-Axis Spine                                                                     |
| 81.32             | Refusion Of Other Cervical Spine, Anterior Column, Anterior Technique                            |
| 81.33             | Refusion Of Other Cervical Spine, Posterior Column, Posterior Technique                          |
| 81.34             | Refusion Of Dorsal And Dorsolumbar Spine, Anterior Column, Anterior Technique                    |
| 81.35             | Refusion Of Dorsal And Dorsolumbar Spine, Posterior Column, Posterior Technique                  |
| 81.36             | Refusion Of Lumbar And Lumbosacral Spine, Anterior Column, Anterior Technique                    |
| 81.37             | Refusion Of Lumbar And Lumbosacral Spine, Posterior Column, Lateral Transverse Process Technique |
| 81.38             | Refusion Of Lumbar And Lumbosacral Spine, Anterior Column, Posterior Technique                   |



|    |       |                                                                                       |
|----|-------|---------------------------------------------------------------------------------------|
| 1  |       |                                                                                       |
| 2  |       |                                                                                       |
| 3  | 81.39 | Refusion Of Spine, Not Elsewhere Classified                                           |
| 4  | 81.63 | Fusion Or Refusion Of 4-8 Vertebrae                                                   |
| 5  | 81.64 | Fusion Or Refusion Of 9 Or More Vertebrae                                             |
| 6  | 84.51 | Insertion Of Interbody Spinal Fusion Device                                           |
| 7  | 84.58 | Implantation of interspinous process decompression device                             |
| 8  | 84.59 | Insert Of Other Spinal Devices                                                        |
| 9  | 84.60 | Insertion Of Spinal Disc Prosthesis; Not Otherwise Specified                          |
| 10 | 84.61 | Insertion Of Partial Spinal Disc Prosthesis, Cervical                                 |
| 11 | 84.62 | Insertion Of Total Spinal Disc Prosthesis, Cervical                                   |
| 12 | 84.63 | Insertion Of Spinal Disc Prosthesis, Thoracic                                         |
| 13 | 84.64 | Insertion Of Partial Spinal Disc Prosthesis, Lumbosacral                              |
| 14 | 84.65 | Insertion Of Total Spinal Disc Prosthesis, Lumbosacral                                |
| 15 | 84.66 | Revision Or Replacement Of Artificial Spinal Disc Prosthesis                          |
| 16 | 84.67 | Revision Or Replacement Of Artificial Spinal Disc Prosthesis, Thoracic                |
| 17 | 84.68 | Revision Or Replacement Of Artificial Spinal Disc Prosthesis, Lumbosacral             |
| 18 | 84.69 | Revision Or Replacement Of Artificial Spinal Disc Prosthesis, Not Otherwise Specified |
| 19 | 84.80 | Insertion Or Replacement Of Interspinous Process Device(s)                            |
| 20 | 84.81 | Revision Of Interspinous Process Device(s)                                            |
| 21 | 84.82 | Insertion Or Replacement Of Pedicle-Based Dynamic Stabilization Device(s)             |
| 22 | 84.83 | Revision Of Pedicle-Based Dynamic Stabilization Device(s)                             |
| 23 | 85.84 | Insertion Or Replacement Of Facet Replacement Device(s)                               |
| 24 | 84.85 | Revision Of Facet Replacement Device(s)                                               |
| 25 |       |                                                                                       |
| 26 |       |                                                                                       |
| 27 |       |                                                                                       |
| 28 |       |                                                                                       |
| 29 |       |                                                                                       |
| 30 |       |                                                                                       |
| 31 |       |                                                                                       |
| 32 |       |                                                                                       |
| 33 |       |                                                                                       |
| 34 |       |                                                                                       |
| 35 |       |                                                                                       |
| 36 |       |                                                                                       |
| 37 |       |                                                                                       |
| 38 |       |                                                                                       |
| 39 |       |                                                                                       |
| 40 |       |                                                                                       |
| 41 |       |                                                                                       |
| 42 |       |                                                                                       |
| 43 |       |                                                                                       |
| 44 |       |                                                                                       |
| 45 |       |                                                                                       |
| 46 |       |                                                                                       |
| 47 |       |                                                                                       |
| 48 |       |                                                                                       |
| 49 |       |                                                                                       |
| 50 |       |                                                                                       |
| 51 |       |                                                                                       |
| 52 |       |                                                                                       |
| 53 |       |                                                                                       |
| 54 |       |                                                                                       |
| 55 |       |                                                                                       |
| 56 |       |                                                                                       |
| 57 |       |                                                                                       |
| 58 |       |                                                                                       |
| 59 |       |                                                                                       |
| 60 |       |                                                                                       |

**Appendix 1d: CPT Codes for Exclusion Criteria**

| CPT code | Description                                                                                                                                                                                                     |
|----------|-----------------------------------------------------------------------------------------------------------------------------------------------------------------------------------------------------------------|
| 00630    | anesthesia for procedures in lumbar region; not otherwise specified.                                                                                                                                            |
| 00670    | anesthesia for extensive spine and spinal cord procedures.                                                                                                                                                      |
| 06300    | vertebral corpectomy (vertebral body resection), partial or complete, for excision of intraspinal lesion, single segment; extradural, cervical                                                                  |
| 20250    | biopsy, vertebral body, open, thoracic                                                                                                                                                                          |
| 20930    | allograft for spine surgery only; morselized (list separately in addition to code for primary procedure)                                                                                                        |
| 20936    | autograft for spine surgery only (includes harvesting the graft); local (eg, ribs, spinous process, or lamina fragments) obtained from same incision                                                            |
| 20937    | autograft for spine surgery only (includes harvesting the graft); morselized (through separate skin or fascial incision) (list separately in addition to code for primary procedure)                            |
| 20938    | autograft for spine surgery only (includes harvesting the graft); structural, bicortical or tricortical (through separate skin or fascial incision) (list separately in addition to code for primary procedure) |
| 22010    | incision & drainage: deep abscess: posterior spine; cervical/thoracic/cervicothoracic                                                                                                                           |
| 22015    | incision & drainage: deep abscess: posterior spine; lumbar/sacral/lumbosacral                                                                                                                                   |
| 22100    | partial excision of posterior vertebral component (eg, spinous process, lamina or facet) for intrinsic bony lesion, single vertebral segment; cervical                                                          |
| 22101    | partial excision of posterior vertebral component (eg, spinous process, lamina or facet) for intrinsic bony lesion, single vertebral segment; thoracic                                                          |
| 22102    | partial excision of posterior vertebral component (eg, spinous process, lamina or facet) for intrinsic bony lesion, single vertebral segment; lumbar                                                            |
| 22103    | partial excision of posterior vertebral component (eg, spinous process, lamina or facet) for intrinsic bony lesion, single vertebral segment; each additional segment                                           |
| 22110    | partial excision of vertebral body, for intrinsic bony lesion, without decompression of spinal cord or nerve root(s), single vertebral segment; cervical                                                        |
| 22112    | partial excision of vertebral body, for intrinsic bony lesion, without decompression of spinal cord or nerve root(s), single vertebral segment; thoracic                                                        |
| 22114    | partial excision of vertebral body, for intrinsic bony lesion, without decompression of spinal cord or nerve root(s), single vertebral segment; lumbar                                                          |
| 22116    | partial excision of vertebral body, for intrinsic bony lesion, without decompression of spinal cord or nerve root(s), single vertebral segment; each additional vertebral segment                               |
| 22206    | osteotomy of spine, posterior or posterolateral approach, three columns, one vertebral segment (eg, pedicle/vertebral body subtraction); thoracic                                                               |
| 22207    | osteotomy of spine, posterior or posterolateral approach, three columns, one vertebral segment (eg, pedicle/vertebral body subtraction); lumbar                                                                 |
| 22208    | osteotomy of spine, posterior or posterolateral approach, three columns, one vertebral segment (eg, pedicle/vertebral body subtraction); each additional vertebral segment                                      |
| 22210    | osteotomy of spine, posterior or posterolateral approach, one vertebral segment; cervical                                                                                                                       |
| 22212    | osteotomy of spine, posterior or posterolateral approach, one vertebral segment; thoracic                                                                                                                       |
| 22214    | osteotomy of spine, posterior or posterolateral approach, one vertebral segment; lumbar                                                                                                                         |
| 22216    | osteotomy of spine, posterior or posterolateral approach, one vertebral segment; each additional vertebral segment (list separately in addition to primary procedure)                                           |
| 22220    | osteotomy of spine, including discectomy, anterior approach, single vertebral segment; cervical                                                                                                                 |

|       |                                                                                                                                                                                                                                                                                                                                                                                |
|-------|--------------------------------------------------------------------------------------------------------------------------------------------------------------------------------------------------------------------------------------------------------------------------------------------------------------------------------------------------------------------------------|
| 22222 | osteotomy of spine, including discectomy, anterior approach, single vertebral segment; thoracic                                                                                                                                                                                                                                                                                |
| 22224 | osteotomy of spine, including discectomy, anterior approach, single vertebral segment; lumbar                                                                                                                                                                                                                                                                                  |
| 22226 | osteotomy of spine, including discectomy, anterior approach, single vertebral segment; each additional vertebral segment                                                                                                                                                                                                                                                       |
| 22305 | closed treatment of vertebral process fracture(s)                                                                                                                                                                                                                                                                                                                              |
| 22310 | closed treatment of vertebral body fracture(s), without manipulation, requiring and including casting or bracing                                                                                                                                                                                                                                                               |
| 22315 | closed treatment of vertebral fracture(s) and/or dislocation(s) requiring casting or bracing, with and including casting and/or bracing, with or without anesthesia, by manipulation or traction                                                                                                                                                                               |
| 22318 | open treatment and/or reduction of odontoid fracture(s) and or dislocation(s) (including os odontoideum), anterior approach, including placement of internal fixation; without grafting                                                                                                                                                                                        |
| 22319 | open treatment and/or reduction of odontoid fracture(s) and or dislocation(s) (including os odontoideum), anterior approach, including placement of internal fixation; with grafting                                                                                                                                                                                           |
| 22325 | open treatment and/or reduction of vertebral fracture(s) and/or dislocation(s), posterior approach, 1 fractured vertebra or dislocated segment; lumbar                                                                                                                                                                                                                         |
| 22326 | open treatment and/or reduction of vertebral fracture(s) and/or dislocation(s), posterior approach, one fractured vertebra or dislocated segment; cervical                                                                                                                                                                                                                     |
| 22327 | open treatment and/or reduction of vertebral fracture(s) and/or dislocation(s), posterior approach, one fractured vertebra or dislocated segment; thoracic                                                                                                                                                                                                                     |
| 22328 | open treatment and/or reduction of vertebral fracture(s) and/or dislocation(s), posterior approach, one fractured vertebra or dislocated segment; each additional fractured vertebra or dislocated segment                                                                                                                                                                     |
| 22505 | manipulation of spine requiring anesthesia, any region                                                                                                                                                                                                                                                                                                                         |
| 22511 | percutaneous vertebroplasty (bone biopsy included when performed), 1 vertebral body, unilateral or bilateral injection, inclusive of all imaging guidance; lumbosacral                                                                                                                                                                                                         |
| 22513 | percutaneous vertebral augmentation, including cavity creation (fracture reduction and bone biopsy included when performed) using mechanical device (eg, kyphoplasty), 1 vertebral body, unilateral or bilateral cannulation, inclusive of all imaging guidance; thoracic                                                                                                      |
| 22514 | percutaneous vertebral augmentation, including cavity creation (fracture reduction and bone biopsy included when performed) using mechanical device (eg, kyphoplasty), 1 vertebral body, unilateral or bilateral cannulation, inclusive of all imaging guidance; lumbar                                                                                                        |
| 22515 | percutaneous vertebral augmentation, including cavity creation (fracture reduction and bone biopsy included when performed) using mechanical device (eg, kyphoplasty), 1 vertebral body, unilateral or bilateral cannulation, inclusive of all imaging guidance; each additional thoracic or lumbar vertebral body (list separately in addition to code for primary procedure) |
| 22520 | percutaneous vertebroplasty, one vertebral body, unilateral or bilateral injection; thoracic                                                                                                                                                                                                                                                                                   |
| 22521 | percutaneous vertebroplasty, one vertebral body, unilateral or bilateral injection; lumbar                                                                                                                                                                                                                                                                                     |
| 22522 | percutaneous vertebroplasty each additional thoracic or lumbar vertebral body                                                                                                                                                                                                                                                                                                  |
| 22523 | percutaneous vertebral augmentation, including cavity creation (fracture reduction and bone biopsy included when performed) using mechanical device, one vertebral body, unilateral or bilateral cannulation (eg, kyphoplasty); thoracic                                                                                                                                       |
| 22524 | percutaneous vertebral augmentation, including cavity creation (fracture reduction and bone biopsy included when performed) using mechanical device, one vertebral body, unilateral or bilateral cannulation (eg, kyphoplasty); lumbar                                                                                                                                         |

|       |                                                                                                                                                                                                                                                                                   |
|-------|-----------------------------------------------------------------------------------------------------------------------------------------------------------------------------------------------------------------------------------------------------------------------------------|
| 22525 | percutaneous vertebral augmentation, including cavity creation (fracture reduction and bone biopsy included when performed) using mechanical device, one vertebral body, unilateral or bilateral cannulation (eg, kyphoplasty); each additional thoracic or lumbar vertebral body |
| 22526 | percutaneous intradiscal electrothermal annuloplasty, unilateral or bilateral including fluoroscopic guidance; single level                                                                                                                                                       |
| 22527 | percutaneous intradiscal electrothermal annuloplasty, unilateral or bilateral including fluoroscopic guidance; one or more additional levels                                                                                                                                      |
| 22532 | arthrodesis, lateral extracavitary technique, including minimal discectomy to prepare interspace (other than for decompression); thoracic                                                                                                                                         |
| 22533 | arthrodesis, lateral extracavitary technique, including minimal discectomy to prepare interspace (other than for decompression); lumbar                                                                                                                                           |
| 22534 | add-on code to describe each additional vertebral segment on which the arthrodesis using lateral extracavitary approach is performed, after the first segment. this code should be used in conjunction with cpt code 22532 and 22533.                                             |
| 22548 | arthrodesis, anterior transoral or extraoral technique, clivus-c1-c2 (atlas-axis), with or without excision of odontoid process                                                                                                                                                   |
| 22551 | arthrodesis, anterior interbody, including disc space preparation, discectomy, osteophylectomy and decompression of spinal cord and/or nerve roots; cervical below c2                                                                                                             |
| 22554 | arthrodesis, anterior interbody technique, including minimal discectomy to prepare interspace (other than for decompression); cervical below c2                                                                                                                                   |
| 22556 | arthrodesis, anterior interbody technique, including minimal discectomy to prepare interspace (other than for decompression); thoracic                                                                                                                                            |
| 22558 | anterior lumbar interbody fusion, first interspace                                                                                                                                                                                                                                |
| 22585 | anterior lumbar interbody fusion, additional interspace                                                                                                                                                                                                                           |
| 22586 | arthrodesis, pre-sacral interbody technique, including disc space preparation, discectomy, with posterior instrumentation, with image guidance, includes bone graft when performed, l5-s1 interspace                                                                              |
| 22590 | arthrodesis, posterior technique, craniocervical (occiput-c2)                                                                                                                                                                                                                     |
| 22595 | arthrodesis, posterior technique, atlas-axis (c1-c2)                                                                                                                                                                                                                              |
| 22600 | arthrodesis, posterior or posterolateral technique, single level; cervical below c2 segment                                                                                                                                                                                       |
| 22610 | arthrodesis, posterior or posterolateral technique, single level; thoracic (with or without lateral transverse technique)                                                                                                                                                         |
| 22612 | arthrodesis, posterior or posterolateral technique, single level; lumbar (with or without lateral transverse technique)                                                                                                                                                           |
| 22614 | arthrodesis, posterior or posterolateral technique, single level; each additional vertebral segment                                                                                                                                                                               |
| 22630 | arthrodesis, posterior interbody technique, including laminectomy and/or discectomy to prepare interspace (other than for decompression), single interspace; lumbar                                                                                                               |
| 22632 | posterior lumbar interbody fusion, each additional interspace                                                                                                                                                                                                                     |
| 22633 | arthrodesis, combined posterior or posterolateral technique with posterior interbody technique including laminectomy and/or discectomy sufficient to prepare interspace (other than for decompression), single interspace and segment; lumbar                                     |
| 22634 | arthrodesis, combined posterior or posterolateral technique with posterior interbody technique including laminectomy and/or discectomy sufficient to prepare interspace (other than for decompression), single interspace and segment; each additional interspace and segment     |
| 22800 | arthrodesis, posterior, for spinal deformity, with or without cast; up to 6 vertebral segments                                                                                                                                                                                    |

|       |                                                                                                                                                                                                                                     |
|-------|-------------------------------------------------------------------------------------------------------------------------------------------------------------------------------------------------------------------------------------|
| 22802 | arthrodesis, posterior, for spinal deformity, with or without cast; 7 to 12 vertebral segments                                                                                                                                      |
| 22804 | arthrodesis, posterior, for spinal deformity, with or without cast; 13 or more vertebral segments                                                                                                                                   |
| 22808 | arthrodesis, anterior, for spinal deformity, with or without cast; 2 to 3 vertebral segments                                                                                                                                        |
| 22810 | arthrodesis, anterior, for spinal deformity, with or without cast; 4 to 7 vertebral segments                                                                                                                                        |
| 22812 | arthrodesis, anterior, for spinal deformity, with or without cast; 8 or more vertebral segments                                                                                                                                     |
| 22818 | kyphectomy, circumferential exposure of spine and resection of vertebral segment(s) (including body and posterior elements); single or 2 segments                                                                                   |
| 22819 | kyphectomy, circumferential exposure of spine and resection of vertebral segment(s) (including body and posterior elements); 3 or more segments                                                                                     |
| 22830 | exploration of spinal fusion                                                                                                                                                                                                        |
| 22840 | posterior non-segmental instrumentation (eg, harrington rod technique, pedicle fixation across one interspace, atlantoaxial transarticular screw fixation, sublaminar wiring at c1, facet screw fixation)                           |
| 22841 | internal spinal fixation by wiring of spinous processes                                                                                                                                                                             |
| 22842 | posterior segmental instrumentation (eg, pedicle fixation, dual rods with multiple hooks and sublaminar wires); 3 to 6 vertebral segments                                                                                           |
| 22843 | posterior segmental instrumentation (eg, pedicle fixation, dual rods with multiple hooks and sublaminar wires); 7 to 12 vertebral segments                                                                                          |
| 22844 | posterior segmental instrumentation (eg, pedicle fixation, dual rods with multiple hooks and sublaminar wires); 13 or more vertebral segments                                                                                       |
| 22845 | anterior instrumentation; 2 to 3 vertebral segments                                                                                                                                                                                 |
| 22846 | anterior instrumentation; 4 to 7 vertebral segments                                                                                                                                                                                 |
| 22847 | anterior instrumentation; 8 or more vertebral segments                                                                                                                                                                              |
| 22848 | pelvic fixation (attachment of caudal end of instrumentation to pelvic bony structures) other than sacrum                                                                                                                           |
| 22849 | reinsertion of spinal fixation device                                                                                                                                                                                               |
| 22850 | removal of posterior nonsegmental instrumentation (eg, harrington rod)                                                                                                                                                              |
| 22851 | application of intervertebral biomechanical device(s) (eg, synthetic cage(s), threaded bone dowel(s), methylmethacrylate) to vertebral defect or interspace                                                                         |
| 22852 | removal of posterior segmental instrumentation                                                                                                                                                                                      |
| 22855 | removal of anterior instrumentation                                                                                                                                                                                                 |
| 22856 | total disc arthroplasty (artificial disc), anterior approach, including discectomy with end plate preparation (includes osteophyctomy for nerve root or spinal cord decompression and microdissection), single interspace, cervical |
| 22857 | total disc arthroplasty (artificial disc), anterior approach, including discectomy to prepare interspace (other than for decompression), single interspace, lumbar                                                                  |
| 22861 | revision including replacement of total disc arthroplasty (artificial disc), anterior approach, single interspace; cervical                                                                                                         |
| 22862 | removal of total disc arthroplasty (artificial disc), anterior approach, single interspace; cervical                                                                                                                                |
| 22864 | removal of total disc arthroplasty (artificial disc), anterior approach, single interspace; cervical                                                                                                                                |
| 22865 | removal of total disc arthroplasty (artificial disc), anterior approach, single interspace; lumbar                                                                                                                                  |
| 27096 | injection procedure for si joint, arthrography, and/or anesthetic steroid                                                                                                                                                           |
| 62263 | percutaneous lysis of epidural adhesions using solution injection or mechanical means, including radiologic localization, multiple adhesiolysis sessions, two or more days                                                          |

|       |                                                                                                                                                                                                                                                                                                                                                                   |
|-------|-------------------------------------------------------------------------------------------------------------------------------------------------------------------------------------------------------------------------------------------------------------------------------------------------------------------------------------------------------------------|
| 62264 | percutaneous lysis of epidural adhesions using solution injection or mechanical means, including radiologic localization, multiple adhesiolysis sessions one day                                                                                                                                                                                                  |
| 62281 | injection/infusion of neurolytic substance (eg, alcohol, phenol, iced saline solutions), with or without other therapeutic substance; epidural, cervical or thoracic                                                                                                                                                                                              |
| 62282 | injection/infusion of neurolytic substance (eg, alcohol, phenol, iced saline solutions), with or without other therapeutic substance; epidural, lumbar, sacral (caudal)                                                                                                                                                                                           |
| 62287 | aspiration procedure, percutaneous, of nucleus pulposus of intervertebral disk, any method, single or multiple levels, lumbar.                                                                                                                                                                                                                                    |
| 62292 | injection procedure for chemonucleolysis, including discography, intervertebral disc, single or multiple levels, lumbar                                                                                                                                                                                                                                           |
| 62310 | injection, single (not via indwelling catheter), not including neurolytic substances, with or without contrast (for either localization or epidurography), of diagnostic or therapeutic substance(s) (including anesthetic, antispasmodic, opioid, steroid, other solution), epidural or subarachnoid; cervical or thoracic                                       |
| 62311 | injection, single (not via indwelling catheter), not including neurolytic substances, with or without contrast (for either localization or epidurography), of diagnostic or therapeutic substance(s) (including anesthetic, antispasmodic, opioid, steroid, other solution), epidural or subarachnoid; lumbar, sacral (caudal)                                    |
| 62318 | injection, including catheter placement, continuous infusion or intermittent bolus, not including neurolytic substances, with or without contrast (for either localization or epidurography), of diagnostic or therapeutic substance(s) (including anesthetic, antispasmodic, opioid, steroid, other solution), epidural or subarachnoid; cervical or thoracic    |
| 62319 | injection, including catheter placement, continuous infusion or intermittent bolus, not including neurolytic substances, with or without contrast (for either localization or epidurography), of diagnostic or therapeutic substance(s) (including anesthetic, antispasmodic, opioid, steroid, other solution), epidural or subarachnoid; lumbar, sacral (caudal) |
| 62322 | injection(s), of diagnostic or therapeutic substance(s) (eg, anesthetic, antispasmodic, opioid, steroid, other solution), not including neurolytic substances, including needle or catheter placement, interlaminar epidural or subarachnoid, lumbar or sacral (caudal) section                                                                                   |
| 62323 | injection(s), of diagnostic or therapeutic substance(s) (eg, anesthetic, antispasmodic, opioid, steroid, other solution), not including neurolytic substances, including needle or catheter placement, interlaminar epidural or subarachnoid, lumbar or sacral (caudal); with imaging guidance (ie, fluoroscopy or ct)                                            |
| 62350 | implantation, revision or repositioning of tunneled intrathecal or epidural catheter, for long-term medication administration via an external pump or implantable reservoir/infusion pump; without laminectomy                                                                                                                                                    |
| 62351 | implantation, revision or repositioning of tunneled intrathecal or epidural catheter, for long-term medication administration via an external pump or implantable reservoir/infusion pump; with laminectomy                                                                                                                                                       |
| 62355 | removal of previously implanted intrathecal or epidural catheter.                                                                                                                                                                                                                                                                                                 |
| 62360 | implantation or replacement of device for intrathecal or epidural drug infusion; subcutaneous reservoir                                                                                                                                                                                                                                                           |
| 62361 | implantation or replacement of device for intrathecal or epidural drug infusion; nonprogrammable pump                                                                                                                                                                                                                                                             |
| 62362 | implantation or replacement of device for intrathecal or epidural drug infusion; programmable pump, including preparation of pump, with or without programming                                                                                                                                                                                                    |
| 62365 | removal of subcutaneous reservoir or pump, previously implanted for intrathecal or epidural infusion                                                                                                                                                                                                                                                              |
| 62367 | electronic analysis of programmable, implanted pump for intrathecal or epidural drug infusion (includes evaluation of reservoir status, alarm status, drug prescription status); without reprogramming or refill                                                                                                                                                  |

|       |                                                                                                                                                                                                                                                                                         |
|-------|-----------------------------------------------------------------------------------------------------------------------------------------------------------------------------------------------------------------------------------------------------------------------------------------|
| 62368 | electronic analysis of programmable, implanted pump for intrathecal or epidural drug infusion (includes evaluation of reservoir status, alarm status, drug prescription status); with reprogramming                                                                                     |
| 62369 | electronic analysis of programmable, implanted pump for intrathecal or epidural drug infusion (includes evaluation of reservoir status, alarm status, drug prescription status); with reprogramming and refill                                                                          |
| 62370 | electronic analysis of programmable, implanted pump for intrathecal or epidural drug infusion (includes evaluation of reservoir status, alarm status, drug prescription status); with reprogramming and refill (requiring physician's skill)                                            |
| 63001 | laminectomy with exploration and/or decompression of spinal cord and/or cauda equina, without facetectomy, foraminotomy or discectomy (e.g., spinal stenosis), 1 or 2 vertebral segments; cervical                                                                                      |
| 63003 | laminectomy with exploration and/or decompression of spinal cord and/or cauda equina, without facetectomy, foraminotomy or discectomy (e.g., spinal stenosis), 1 or 2 vertebral segments; thoracic                                                                                      |
| 63005 | lumbar laminectomy without facetectomy, foraminotomy or discectomy, 1 or 2 segments                                                                                                                                                                                                     |
| 63011 | laminectomy with exploration and/or decompression of spinal cord and/or cauda equina, without facetectomy, foraminotomy or discectomy (e.g., spinal stenosis), 1 or 2 vertebral segments; sacral                                                                                        |
| 63012 | lumbar laminectomy for spondylolisthesis with removal of abnormal facet or pars interarticularis)                                                                                                                                                                                       |
| 63015 | laminectomy with exploration and/or decompression of spinal cord and/or cauda equina, without facetectomy, foraminotomy or discectomy (e.g., spinal stenosis), more than 2 vertebral segments; cervical                                                                                 |
| 63016 | laminectomy with exploration and/or decompression of spinal cord and/or cauda equina, without facetectomy, foraminotomy or discectomy (e.g., spinal stenosis), more than 2 vertebral segments; thoracic                                                                                 |
| 63017 | more than two segments                                                                                                                                                                                                                                                                  |
| 63020 | laminotomy (hemilaminectomy), with decompression of nerve root(s), including partial facetectomy, foraminotomy and/or excision of herniated intervertebral disc, including open and endoscopically-assisted approaches; 1 interspace, cervical                                          |
| 63030 | lumbar laminotomy including partial facetectomy, foraminotomy, and/or excision of herniated disc                                                                                                                                                                                        |
| 63035 | each additional interspace                                                                                                                                                                                                                                                              |
| 63040 | laminotomy (hemilaminectomy), with decompression of nerve root(s), including partial facetectomy, foraminotomy and/or excision of herniated intervertebral disc, reexploration, single interspace; cervical                                                                             |
| 63042 | re-exploration lumbar laminotomy, including partial facetectomy, foraminotomy, and/or excision of herniated disc                                                                                                                                                                        |
| 63043 | laminotomy with decompression of nerve root, each additional cervical interspace                                                                                                                                                                                                        |
| 63044 | each additional interspace                                                                                                                                                                                                                                                              |
| 63045 | laminectomy, facetectomy and foraminotomy (unilateral or bilateral with decompression of spinal cord, cauda equina and/or nerve root[s], [e.g., spinal or lateral recess stenosis]), single vertebral segment; cervical                                                                 |
| 63046 | laminectomy, facetectomy and foraminotomy (unilateral or bilateral with decompression of spinal cord, cauda equina and/or nerve root[s], [e.g., spinal or lateral recess stenosis]), single vertebral segment; thoracic                                                                 |
| 63047 | lumbar laminectomy, facetectomy and foraminotomy, single level)                                                                                                                                                                                                                         |
| 63048 | each additional segment                                                                                                                                                                                                                                                                 |
| 63050 | laminoplasty, cervical, with decompression of the spinal cord, 2 or more vertebral segments                                                                                                                                                                                             |
| 63051 | laminoplasty, cervical, with decompression of the spinal cord, 2 or more vertebral segments; with reconstruction of the posterior bony elements (including the application of bridging bone graft and non-segmental fixation devices (e.g., wire, suture, mini-plates), when performed) |

|       |                                                                                                                                                                                                                                                                   |
|-------|-------------------------------------------------------------------------------------------------------------------------------------------------------------------------------------------------------------------------------------------------------------------|
| 63055 | transpedicular approach with decompression of spinal cord, equina and/or nerve root(s) (e.g., herniated intervertebral disc), single segment; thoracic                                                                                                            |
| 63056 | transpedicular approach with decompression of spinal cord, equina and/or nerve root(s) (e.g., herniated intervertebral disc), single segment; lumbar (including transfacet, or lateral extraforaminal approach) (e.g., far lateral herniated intervertebral disc) |
| 63057 | transpedicular approach with decompression of spinal cord, each additional segmen                                                                                                                                                                                 |
| 63064 | costovertebral approach with decompression of spinal cord or nerve root(s) (e.g., herniated intervertebral disc), thoracic; single segment                                                                                                                        |
| 63066 | costrovertebral approach with decompression of spinal cord or nerve roots, thoracic, each additional segment                                                                                                                                                      |
| 63075 | discectomy, anterior, with decompression of spinal cord and/or nerve root(s), including osteophyctectomy; cervical, single interspace                                                                                                                             |
| 63076 | discectomy, anterior, with decompression of spinal cord and/or nerve root(s), including osteophyctectomy; cervical, each additional interspac                                                                                                                     |
| 63077 | discectomy, anterior, with decompression of spinal cord and/or nerve root(s), including osteophyctectomy; thoracic, single interspace                                                                                                                             |
| 63078 | discectomy, anterior, with decompression of spinal cord and/or nerve root(s), including osteophyctectomy; thoracic, each additional interspace                                                                                                                    |
| 63081 | vertebral corpectomy (vertebral body resection), partial or complete, anterior approach with decompression of spinal cord and/or nerve root(s); cervical, single segment                                                                                          |
| 63082 | vertebral corpectomy (vertebral body resection), partial or complete, anterior approach with decompression of spinal cord and/or nerve root(s); cervical, each additional segment                                                                                 |
| 63085 | vertebral corpectomy (vertebral body resection), partial or complete, transthoracic approach with decompression of spinal cord and/or nerve root(s); thoracic, single segment                                                                                     |
| 63086 | vertebral corpectomy (vertebral body resection), partial or complete, transthoracic approach with decompression of spinal cord and/or nerve root(s); thoracic, each additional segment                                                                            |
| 63087 | vertebral corpectomy (vertebral body resection), partial or complete, combined thoracolumbar approach with decompression of spinal cord, cauda equina or nerve root(s), lower thoracic or lumbar; single segment                                                  |
| 63088 | vertebral corpectomy (vertebral body resection), partial or complete, combined thoracolumbar approach with decompression of spinal cord, cauda equina or nerve root(s), lower thoracic or lumbar; each additional segment                                         |
| 63090 | vertebral corpectomy (vertebral body resection), partial or complete, transperitoneal or retroperitoneal approach with decompression of spinal cord, cauda equina or nerve root(s), lower thoracic, lumbar, or sacral; single segment                             |
| 63091 | or retroperitoneal approach with decompression of spinal cord, cauda equina or nerve root(s), lower thoracic, lumbar, or sacral; each additional segment                                                                                                          |
| 63102 | vertebral corpectomy (vertebral body resection), partial or complete, lateral extracavitary approach with decompression of spinal cord and/or nerve root(s) (e.g., for tumor or retropulsed bone fragments); lumbar, single segment                               |
| 63103 | vertebral corpectomy (vertebral body resection), partial or complete, lateral extracavitary approach with decompression of spinal cord and/or nerve root(s) (e.g., for tumor or retropulsed bone fragments); thoracic or lumbar, each additional segment          |
| 63170 | laminectomy with myelotomy (e.g., bischof or drez type), cervical, thoracic, or thoracolumbar                                                                                                                                                                     |
| 63172 | laminectomy with drainage of intramedullary cyst/syrinx; to subarachnoid space                                                                                                                                                                                    |



|       |                                                                                                                                                                          |
|-------|--------------------------------------------------------------------------------------------------------------------------------------------------------------------------|
| 63173 | laminectomy with drainage of intramedullary cyst/syrinx; to peritoneal or pleural space                                                                                  |
| 63180 | laminectomy and section of dentate ligaments, with or without dural graft, cervical; 1 or 2 segments                                                                     |
| 63182 | laminectomy and section of dentate ligaments, with or without dural graft, cervical; more than 2 segments                                                                |
| 63185 | laminectomy with rhizotomy; 1 or 2 segments                                                                                                                              |
| 63190 | laminectomy with rhizotomy; more than 2 segments                                                                                                                         |
| 63191 | laminectomy with section of spinal accessory nerve                                                                                                                       |
| 63194 | laminectomy with cordotomy, with section of 1 spinothalamic tract, 1 stage; cervical                                                                                     |
| 63195 | laminectomy with cordotomy, with section of 1 spinothalamic tract, 1 stage; thoracic                                                                                     |
| 63196 | laminectomy with cordotomy, with section of both spinothalamic tracts, 1 stage; cervical                                                                                 |
| 63197 | laminectomy with cordotomy, with section of both spinothalamic tracts, 1 stage; thoracic                                                                                 |
| 63198 | laminectomy with cordotomy with section of both spinothalamic tracts, 2 stages within 14 days; cervical                                                                  |
| 63199 | laminectomy with cordotomy with section of both spinothalamic tracts, 2 stages within 14 days; thoracic                                                                  |
| 63200 | laminectomy, with release of tethered spinal cord, lumbar                                                                                                                |
| 63250 | laminectomy for excision or occlusion of arteriovenous malformation of spinal cord; cervical                                                                             |
| 63251 | laminectomy for excision or occlusion of arteriovenous malformation of spinal cord; thoracic                                                                             |
| 63252 | laminectomy for excision or occlusion of arteriovenous malformation of spinal cord; thoracolumbar                                                                        |
| 63265 | laminectomy for excision or evacuation of intraspinal lesion other than neoplasm, extradural; cervical                                                                   |
| 63266 | laminectomy for excision or evacuation of intraspinal lesion other than neoplasm, extradural; thoracic                                                                   |
| 63267 | laminectomy for excision or evacuation of intraspinal lesion other than neoplasm, extradural; lumbar                                                                     |
| 63268 | laminectomy for excision or evacuation of intraspinal lesion other than neoplasm, extradural; sacral                                                                     |
| 63270 | laminectomy for excision of intraspinal lesion other than neoplasm, intradural; cervical                                                                                 |
| 63271 | laminectomy for excision of intraspinal lesion other than neoplasm, intradural; thoracic                                                                                 |
| 63272 | laminectomy for excision of intraspinal lesion other than neoplasm, intradural; lumbar                                                                                   |
| 63273 | laminectomy for excision of intraspinal lesion other than neoplasm, intradural; sacral                                                                                   |
| 63275 | laminectomy for biopsy/excision of intraspinal neoplasm; extradural, cervical                                                                                            |
| 63276 | laminectomy for biopsy/excision of intraspinal neoplasm; extradural, thoracic                                                                                            |
| 63277 | laminectomy for biopsy/excision of intraspinal neoplasm; extradural, lumbar                                                                                              |
| 63278 | laminectomy for biopsy/excision of intraspinal neoplasm; extradural, sacral                                                                                              |
| 63280 | laminectomy for biopsy/excision of intraspinal neoplasm; intradural, extramedullary, cervical                                                                            |
| 63281 | laminectomy for biopsy/excision of intraspinal neoplasm; intradural, extramedullary, thoracic                                                                            |
| 63282 | laminectomy for biopsy/excision of intraspinal neoplasm; intradural, extramedullary, lumbar                                                                              |
| 63283 | laminectomy for biopsy/excision of intraspinal neoplasm; intradural, sacral                                                                                              |
| 63285 | laminectomy for biopsy/excision of intraspinal neoplasm; intradural, intramedullary, cervical                                                                            |
| 63286 | laminectomy for biopsy/excision of intraspinal neoplasm; intradural, intramedullary, thoracic                                                                            |
| 63287 | laminectomy for biopsy/excision of intraspinal neoplasm; intradural, intramedullary, thoracolumbar                                                                       |
| 63290 | laminectomy for biopsy/excision of intraspinal neoplasm; combined extradural-intradural lesion, any level                                                                |
| 63295 | osteoplastic reconstruction of dorsal spinal elements, following primary intraspinal procedure (list separately in addition to code for primary procedure)               |
| 63301 | vertebral corpectomy (vertebral body resection), partial or complete, for excision of intraspinal lesion, single segment; extradural, thoracic by transthoracic approach |

|       |                                                                                                                                                                                                         |
|-------|---------------------------------------------------------------------------------------------------------------------------------------------------------------------------------------------------------|
| 63302 | vertebral corpectomy (vertebral body resection), partial or complete, for excision of intraspinal lesion, single segment; extradural, thoracic by thoracolumbar approach                                |
| 63303 | vertebral corpectomy (vertebral body resection), partial or complete, for excision of intraspinal lesion, single segment; extradural, lumbar or sacral by transperitoneal or retroperitoneal approach   |
| 63304 | vertebral corpectomy (vertebral body resection), partial or complete, for excision of intraspinal lesion, single segment; intradural, cervical                                                          |
| 63305 | vertebral corpectomy (vertebral body resection), partial or complete, for excision of intraspinal lesion, single segment; intradural, thoracic by transthoracic approach                                |
| 63306 | vertebral corpectomy (vertebral body resection), partial or complete, for excision of intraspinal lesion, single segment; intradural, thoracic by thoracolumbar approach                                |
| 63307 | vertebral corpectomy (vertebral body resection), partial or complete, for excision of intraspinal lesion, single segment; intradural, lumbar or sacral by transperitoneal or retroperitoneal approach   |
| 63308 | vertebral corpectomy (vertebral body resection), partial or complete, for excision of intraspinal lesion, single segment; each additional segment                                                       |
| 63650 | dorsal column stimulator placements                                                                                                                                                                     |
| 63655 | laminectomy for implantation of neurostimulator electrodes, plate/paddle, epidural                                                                                                                      |
| 63660 | revision or removal of spinal neurostimulator electrodes                                                                                                                                                |
| 63661 | removal of spinal neurostimulator electrode percutaneous array(s), including fluoroscopy, when performed                                                                                                |
| 63662 | removal of spinal neurostimulator electrode plate/paddle(s) placed via laminotomy or laminectomy, including fluoroscopy, when performed                                                                 |
| 63663 | revision including replacement, when performed, of spinal neurostimulator electrode percutaneous array(s), including fluoroscopy, when performed                                                        |
| 63664 | revision including replacement, when performed, of spinal neurostimulator electrode plate/paddle(s) placed via laminotomy or laminectomy, including fluoroscopy, when performed                         |
| 63685 | insertion or replacement of spinal neurostimulator pulse generator or receiver, direct or inductive coupling                                                                                            |
| 63688 | revision including replacement, when performed, of spinal neurostimulator electrode plate/paddle(s) placed via laminotomy or laminectomy, including fluoroscopy, when performed                         |
| 64470 | injection, anesthetic agent and/or steroid, paravertebral facet joint or facet joint nerve; cervical or thoracic, single level                                                                          |
| 64472 | injection, anesthetic agent and/or steroid, paravertebral facet joint or facet joint nerve; cervical or thoracic, each additional level                                                                 |
| 64475 | injection, anesthetic agent and/or steroid, paravertebral facet joint or facet joint nerve; lumbar or sacral, single level                                                                              |
| 64476 | injection, anesthetic agent and/or steroid, paravertebral facet joint or facet joint nerve; lumbar or sacral, each additional level                                                                     |
| 64479 | injection, anesthetic agent and/or steroid, transforaminal epidural; cervical or thoracic, single level                                                                                                 |
| 64480 | injection, anesthetic agent and/or steroid, transforaminal epidural; cervical or thoracic, each additional level                                                                                        |
| 64483 | injection, anesthetic agent and/or steroid, transforaminal epidural; lumbar or sacral, single level                                                                                                     |
| 64484 | injection, anesthetic agent and/or steroid, transforaminal epidural; lumbar or sacral, each additional level                                                                                            |
| 64490 | injection(s), diagnostic or therapeutic agent, paravertebral facet (zygapophyseal) joint (or nerves innervating that joint) with image guidance (fluoroscopy or ct), cervical or thoracic; single level |
| 64491 | injection(s), diagnostic or therapeutic agent, paravertebral facet (zygapophyseal) joint (or nerves innervating that joint) with image guidance (fluoroscopy or ct), cervical or thoracic; second level |

|       |                                                                                                                                                                                                                                                                                                            |
|-------|------------------------------------------------------------------------------------------------------------------------------------------------------------------------------------------------------------------------------------------------------------------------------------------------------------|
| 64492 | injection(s), diagnostic or therapeutic agent, paravertebral facet (zygapophyseal) joint (or nerves innervating that joint) with image guidance (fluoroscopy or ct), cervical or thoracic; third and any additional level(s)                                                                               |
| 64493 | paravertebral facet joint injection, lumbar or sacral, single level                                                                                                                                                                                                                                        |
| 64494 | paravertebral facet joint injection, lumbar or sacral, second level                                                                                                                                                                                                                                        |
| 64495 | paravertebral facet joint injection, lumbar or sacral, third and each additional level                                                                                                                                                                                                                     |
| 64520 | Injection, anesthetic agent; lumbar or thoracic (paravertebral sympathetic)                                                                                                                                                                                                                                |
| 64553 | percutaneous implantation of neurostimulator electrode array; cranial nerve                                                                                                                                                                                                                                |
| 64622 | destruction by neurolytic agent, paravertebral facet joint nerve; lumbar or sacral, single level                                                                                                                                                                                                           |
| 64623 | lumbar or sacral, each additional level                                                                                                                                                                                                                                                                    |
| 64635 | destruction by neurolytic agent, paravertebral facet joint nerve; lumbar or sacral, single level with image guidance                                                                                                                                                                                       |
| 64636 | lumbar or sacral, each additional level with image guidance                                                                                                                                                                                                                                                |
| 95991 | refilling and maintenance of implantable pump or reservoir for drug delivery, spinal (intrathecal, epidural) or brain (intraventricular), includes electronic analysis of pump, when performed; requiring skill of a physician or other qualified health care professional                                 |
| 0092T | total disc arthroplasty (artificial disc), anterior approach, including discectomy with end plate preparation (includes osteophylectomy for nerve root or spinal cord decompression and microdissection), each additional interspace, cervical (list separately in addition to code for primary procedure) |
| 0095T | removal of total disc arthroplasty (artificial disc), anterior approach, each additional interspace, cervical (list separately in addition to code for primary procedure)                                                                                                                                  |
| 0098T | revision including replacement of total disc arthroplasty (artificial disc), anterior approach, each additional interspace, cervical (list separately in addition to code for primary procedure)                                                                                                           |
| 0163T | total disc arthroplasty (artificial disc), anterior approach, including discectomy to prepare interspace (other than for decompression), each additional interspace, lumbar (list separately in addition to code for primary procedure)                                                                    |
| 0164T | removal of total disc arthroplasty, (artificial disc), anterior approach, each additional interspace, lumbar (list separately in addition to code for primary procedure)                                                                                                                                   |
| 0165T | revision including replacement of total disc arthroplasty (artificial disc), anterior approach, each additional interspace, lumbar (list separately in addition to code for primary procedure)                                                                                                             |
| 0171T | insertion of posterior spinous process distraction device (including necessary removal of bone or ligament for insertion and imaging guidance), lumbar; single level                                                                                                                                       |
| 0172T | insertion of posterior spinous process distraction device (including necessary removal of bone or ligament for insertion and imaging guidance), lumbar; each additional level (list separately in addition to code for primary procedure)                                                                  |
| 0215T | injection(s), diagnostic or therapeutic agent, paravertebral facet (zygapophyseal) joint (or nerves innervating that joint) with ultrasound guidance, cervical or thoracic; third and any additional level(s)                                                                                              |
| 0216T | injection(s), diagnostic or therapeutic agent, paravertebral facet (zygapophyseal) joint (or nerves innervating that joint) with ultrasound guidance, lumbar or sacral; single level                                                                                                                       |
| 0217T | injection(s), diagnostic or therapeutic agent, paravertebral facet (zygapophyseal) joint (or nerves innervating that joint) with ultrasound guidance, lumbar or sacral; second level                                                                                                                       |
| 0218T | injection(s), diagnostic or therapeutic agent, paravertebral facet (zygapophyseal) joint (or nerves innervating that joint) with ultrasound guidance, lumbar or sacral; third and any additional level(s)                                                                                                  |
| 0230T | injection(s), anesthetic agent and/or steroid, transforaminal epidural, with ultrasound guidance, lumbar or sacral; single level                                                                                                                                                                           |

|       |                                                                                                                                                                                                                                                                             |
|-------|-----------------------------------------------------------------------------------------------------------------------------------------------------------------------------------------------------------------------------------------------------------------------------|
| 0231T | injection(s), anesthetic agent and/or steroid, transforaminal epidural, with ultrasound guidance, lumbar or sacral; each additional level                                                                                                                                   |
| 0282T | percutaneous or open implantation of neurostimulator electrode array(s), subcutaneous (peripheral subcutaneous field stimulation), including imaging guidance, when performed, cervical, thoracic or lumbar, for trial, including removal at the conclusion of trial period |
| 0283T | percutaneous or open implantation of neurostimulator electrode array(s), subcutaneous (peripheral subcutaneous field stimulation), including imaging guidance, when performed, cervical, thoracic or lumbar, permanent, with implantation of a pulse generator              |
| 0284T | revision or removal of pulse generator or electrodes, including imaging guidance, when performed, including addition of new electrodes, when performed                                                                                                                      |

For peer review only

**Appendix table 2:** Hosmer Lemeshow and c-statistics for all logistic models

| <b>Outcome</b>          | <b>Hosmer Lemeshow<br/>chi-square</b> | <b>p-value</b> | <b>c-statistic</b> |
|-------------------------|---------------------------------------|----------------|--------------------|
| Any opioid use          | 19.029                                | 0.015          | 0.631              |
| Early opioid use        | 15.395                                | 0.052          | 0.704              |
| Long-term opioid<br>use | 17.181                                | 0.028          | 0.753              |

For peer review only

**Appendix Table 3:** Bootstrapping, early opioid use

| Initial Provider   | n   | OR (95% CI) bootstrapping | Early use, OR (95% CI) |
|--------------------|-----|---------------------------|------------------------|
| Physical therapy   | 200 | 0.15 (0.13, 0.17)         | 0.15 (0.13,0.17)       |
| Chiropractor       | 200 | 0.10 (0.09, 0.10)         | 0.10 (0.09,0.10)       |
| Acupuncture        | 200 | 0.09 (0.07, 0.12)         | 0.09 (0.07,0.12)       |
| Orthopedics        | 200 | 0.63 (0.60, 0.67)         | 0.63 (0.60,0.67)       |
| Emergency Medicine | 200 | 2.66 (2.54, 2.78)         | 2.66 (2.54,2.78)       |
| Neurosurgeon       | 200 | 0.57 (0.48, 0.69)         | 0.58 (0.47,0.71)       |
| MD Other           | 200 | 0.50 (0.46, 0.54)         | 0.50 (0.46,0.54)       |
| Radiology          | 200 | 0.70 (0.67, 0.73)         | 0.70 (0.67,0.73)       |
| Rehab              | 200 | 0.54 (0.49, 0.59)         | 0.54 (0.49,0.59)       |
| Other              | 200 | 0.81 (0.76, 0.87)         | 0.81 (0.76,0.87)       |

**Appendix Table 3 Legend:** Bootstrapping is a resampling technique that allows assigning of accuracy. The estimates reported using bootstrapping methods listed in this table indicate little or no differences with the actual results.

**Appendix table 4:** Multivariable odds of initial chiropractic care and initial PT versus initial PCP as a function of baseline covariates

| Covariate                               | Levels                    | PT                 | Chiro               |
|-----------------------------------------|---------------------------|--------------------|---------------------|
|                                         |                           | OR (95% CI)        | OR (95% CI)         |
| AGE                                     | 45-65 vs 18-44            | 1.02 (0.93,1.12)   | 0.81 (0.78, 0.83) * |
|                                         | 65-74 vs 18-44            | 1.15 (0.82,1.61)   | 0.77 (0.69, 0.86) * |
| GENDER                                  | Female vs Male            | 1.16 (1.06,1.27)   | 0.84 (0.82, 0.87) * |
| RACE                                    | Asian vs White            | 1.03 (0.86,1.23)   | 0.68 (0.64, 0.73) * |
|                                         | Black vs White            | 0.67 (0.56,0.82) * | 0.48 (0.46, 0.51) * |
|                                         | Hispanic vs White         | 0.67 (0.57,0.78) * | 0.64 (0.62, 0.67) * |
|                                         | Unknown vs White          | 0.94 (0.75,1.19)   | 0.84 (0.77, 0.90) * |
| REGION                                  | Midwest vs Northeast      | 2.11 (1.82,2.44) * | 0.87 (0.83, 0.91) * |
|                                         | South vs Northeast        | 0.88 (0.77,1.00)   | 0.86 (0.83, 0.89) * |
|                                         | West vs Northeast         | 2.11 (1.83,2.42) * | 1.00 (0.95, 1.04)   |
| Pregnancy                               |                           | 5.79 (4.92,6.83) * | 1.76 (1.62, 1.92) * |
| Accidents                               |                           | 0.74 (0.56,0.97) * | 0.36 (0.32, 0.40) * |
| Anxiety                                 |                           | 0.95 (0.82,1.11)   | 0.88 (0.84, 0.93) * |
| Bipolar                                 |                           | 0.56 (0.36,0.88) * | 0.93 (0.83, 1.05)   |
| Depression                              |                           | 0.92 (0.79,1.08)   | 0.96 (0.92, 1.01)   |
| Dementia                                |                           | -                  | 0.72 (0.43, 1.21)   |
| ADHD                                    |                           | 1.54 (1.17,2.04) * | 0.99 (0.90, 1.09)   |
| Alcohol use disorder                    |                           | 0.95 (0.60,1.49)   | 0.96 (0.83, 1.10)   |
| Substance use disorder                  |                           | 0.88 (0.47,1.62)   | 0.82 (0.68, 0.99) * |
| Chronic Pain,<br>fibromyalgia & Fatigue |                           | 1.44 (1.22,1.69) * | 0.90 (0.84, 0.95) * |
| Psychotic Disorder                      |                           | 1.00 (0.40,2.48)   | 1.14 (0.87, 1.48)   |
| Opioid use 13-24 months<br>back         |                           | 0.78 (0.69,0.87)*  | 0.84 (0.81, 0.87) * |
| PT 1-24 months back                     |                           | 5.00 (4.45,5.62) * | 1.12 (1.05, 1.20) * |
| Chiro any 1-24 months<br>back           |                           | 1.45 (1.17,1.79) * | 6.92 (6.52, 7.35) * |
| Acupuncture any 1-24<br>months back     |                           | 1.80 (1.18,2.75) * | 1.39 (1.12, 1.73) * |
| LBP 13-24 months back                   |                           | 1.27 (0.98,1.65)   | 0.85 (0.77, 0.93) * |
| Elixhauser physical                     |                           | 0.91 (0.87,0.95) * | 0.91 (0.89, 0.92) * |
| PT State Access                         | Provisional vs<br>Limited | 1.21 (1.05,1.40) * | -                   |
|                                         | Unlimited vs Limited      | 1.67 (1.41,1.98) * | -                   |
| Year of index visit                     |                           | 1.06 (1.02,1.09) * | 1.02 (1.01, 1.03) * |

**Appendix Table 4 Legend:** Pregnancy: pregnancy in the 12 months prior to the initial LBP visit; Accidents: motor vehicle accidents in the 12 months prior to the initial LBP visit; \*p < .01. Reference group for age: ages 18-44; reference group for gender: male; reference group for race: white; reference group for region: Northeast; reference group for PT State Access: limited.

**Appendix table 5:** Propensity matching for initial Physical Therapy (PT) and initial chiropractor vs. initial Primary Care Physician (PCP)

| <b>Outcome</b>       |                                                          | <b>OR (95% CI)</b> |
|----------------------|----------------------------------------------------------|--------------------|
| Early opioid use     | Initial PT (N=2248) vs. initial PCP (N=4496)             | 0.15 (0.12, 0.18)  |
| Long-term opioid use | Initial PT (N=2248) vs. initial PCP (N=4496)             | 0.29 (0.12, 0.69)  |
| Early opioid use     | Initial Chiropractor (N=32300) vs. initial PCP (N=32300) | 0.10 (0.09, 0.10)  |
| Long-term opioid use | Initial Chiropractor (N=32300) vs. initial PCP (N=32300) | 0.21 (0.16, 0.27)  |

For peer review only



**Appendix table 6:** Multivariable odds of initial chiropractic care and initial PT versus initial PCP as a function of baseline covariates

| Covariate                               | Levels                     | PT                 | Chiro               |
|-----------------------------------------|----------------------------|--------------------|---------------------|
|                                         |                            | OR (95% CI)        | OR (95% CI)         |
| AGE                                     | 45-65 vs 18-44             | 1.02 (0.93,1.12)   | 0.81 (0.78, 0.83) * |
|                                         | 65-74 vs 18-44             | 1.15 (0.82,1.61)   | 0.77 (0.69, 0.86) * |
| GENDER                                  | Female vs Male             | 1.16 (1.06,1.27)*  | 0.84 (0.82, 0.87) * |
| RACE                                    | Asian vs White             | 1.03 (0.86,1.23)   | 0.68 (0.64, 0.73) * |
|                                         | Black vs White             | 0.67 (0.56,0.82) * | 0.48 (0.46, 0.51) * |
|                                         | Hispanic vs White          | 0.67 (0.57,0.78) * | 0.64 (0.62, 0.67) * |
|                                         | Unknown vs White           | 0.94 (0.75,1.19)   | 0.84 (0.77, 0.90) * |
| REGION                                  | Midwest vs Northeast       | 2.11 (1.82,2.44) * | 0.87 (0.83, 0.91) * |
|                                         | South vs Northeast         | 0.88 (0.77,1.00)   | 0.86 (0.83, 0.89) * |
|                                         | West vs Northeast          | 2.11 (1.83,2.42) * | 1.00 (0.95, 1.04)   |
| Pregnancy                               |                            | 5.79 (4.92,6.83) * | 1.76 (1.62, 1.92) * |
| Accidents                               |                            | 0.74 (0.56,0.97) * | 0.36 (0.32, 0.40) * |
| Anxiety                                 |                            | 0.95 (0.82,1.11)   | 0.88 (0.84, 0.93) * |
| Bipolar                                 |                            | 0.56 (0.36,0.88) * | 0.93 (0.83, 1.05)   |
| Depression                              |                            | 0.92 (0.79,1.08)   | 0.96 (0.92, 1.01)   |
| Dementia                                |                            | -                  | 0.72 (0.43, 1.21)   |
| ADHD                                    |                            | 1.54 (1.17,2.04) * | 0.99 (0.90, 1.09)   |
| Alcohol use disorder                    |                            | 0.95 (0.60,1.49)   | 0.96 (0.83, 1.10)   |
| Substance use disorder                  |                            | 0.88 (0.47,1.62)   | 0.82 (0.68, 0.99) * |
| Chronic Pain,<br>fibromyalgia & Fatigue |                            | 1.44 (1.22,1.69) * | 0.90 (0.84, 0.95) * |
| Psychotic Disorder                      |                            | 1.00 (0.40,2.48)   | 1.14 (0.87, 1.48)   |
| Opioid use 13-24 months<br>back         |                            | 0.78 (0.69,0.87)   | 0.84 (0.81, 0.87) * |
| PT 1-24 months back                     |                            | 5.00 (4.45,5.62) * | 1.12 (1.05, 1.20) * |
| Chiro any 1-24 months<br>back           |                            | 1.45 (1.17,1.79) * | 6.92 (6.52, 7.35) * |
| Acupuncture any 1-24<br>months back     |                            | 1.80 (1.18,2.75) * | 1.39 (1.12, 1.73) * |
| LBP 13-24 months back                   |                            | 1.27 (0.98,1.65)   | 0.85 (0.77, 0.93) * |
| Elixhauser physical                     |                            | 0.91 (0.87,0.95) * | 0.91 (0.89, 0.92) * |
| PT State Access                         | Provisional vs<br>Limited  | 1.21 (1.05,1.40) * | -                   |
|                                         | Unrestricted vs<br>Limited | 1.67 (1.41,1.98) * | -                   |
| Year of index visit                     |                            | 1.06 (1.02,1.09) * | 1.02 (1.01, 1.03) * |

**Appendix Table 6 Legend:** Pregnancy: pregnancy in the 12 months prior to the initial LBP visit; Accidents: motor vehicle accidents in the 12 months prior to the initial LBP visit; \*p < .01. Reference group for age: ages 18-44; reference group for gender: male; reference group for race: white; reference group for region: Northeast; reference group for PT State Access: limited.

STROBE Statement—Checklist of items that should be included in reports of *cohort studies*

|                              | Item No | Recommendation                                                                                                                                                                                    | Page No          |
|------------------------------|---------|---------------------------------------------------------------------------------------------------------------------------------------------------------------------------------------------------|------------------|
| <b>Title and abstract</b>    | 1       | (a) Indicate the study's design with a commonly used term in the title or the abstract                                                                                                            | 1,2              |
|                              |         | (b) Provide in the abstract an informative and balanced summary of what was done and what was found                                                                                               | 2                |
| <b>Introduction</b>          |         |                                                                                                                                                                                                   |                  |
| Background/rationale         | 2       | Explain the scientific background and rationale for the investigation being reported                                                                                                              | 3                |
| Objectives                   | 3       | State specific objectives, including any prespecified hypotheses                                                                                                                                  | 4                |
| <b>Methods</b>               |         |                                                                                                                                                                                                   |                  |
| Study design                 | 4       | Present key elements of study design early in the paper                                                                                                                                           | 4-7              |
| Setting                      | 5       | Describe the setting, locations, and relevant dates, including periods of recruitment, exposure, follow-up, and data collection                                                                   | 4-6              |
| Participants                 | 6       | (a) Give the eligibility criteria, and the sources and methods of selection of participants. Describe methods of follow-up                                                                        | 4-6              |
|                              |         | (b) For matched studies, give matching criteria and number of exposed and unexposed                                                                                                               | NA               |
| Variables                    | 7       | Clearly define all outcomes, exposures, predictors, potential confounders, and effect modifiers. Give diagnostic criteria, if applicable                                                          | 4-7              |
| Data sources/<br>measurement | 8*      | For each variable of interest, give sources of data and details of methods of assessment (measurement). Describe comparability of assessment methods if there is more than one group              | 4-7              |
| Bias                         | 9       | Describe any efforts to address potential sources of bias                                                                                                                                         | 6-7              |
| Study size                   | 10      | Explain how the study size was arrived at                                                                                                                                                         | 4-7,<br>figure 1 |
| Quantitative variables       | 11      | Explain how quantitative variables were handled in the analyses. If applicable, describe which groupings were chosen and why                                                                      | 4-7              |
| Statistical methods          | 12      | (a) Describe all statistical methods, including those used to control for confounding                                                                                                             | 4-7              |
|                              |         | (b) Describe any methods used to examine subgroups and interactions                                                                                                                               | NA               |
|                              |         | (c) Explain how missing data were addressed                                                                                                                                                       | NA               |
|                              |         | (d) If applicable, explain how loss to follow-up was addressed                                                                                                                                    | NA               |
|                              |         | (e) Describe any sensitivity analyses                                                                                                                                                             | NA               |
| <b>Results</b>               |         |                                                                                                                                                                                                   |                  |
| Participants                 | 13*     | (a) Report numbers of individuals at each stage of study—eg numbers potentially eligible, examined for eligibility, confirmed eligible, included in the study, completing follow-up, and analysed | 7, figure 1      |
|                              |         | (b) Give reasons for non-participation at each stage                                                                                                                                              | NA               |
|                              |         | (c) Consider use of a flow diagram                                                                                                                                                                | Figure 1         |
| Descriptive data             | 14*     | (a) Give characteristics of study participants (eg demographic, clinical, social) and information on exposures and potential confounders                                                          | 7-9,<br>table 1  |
|                              |         | (b) Indicate number of participants with missing data for each variable of interest                                                                                                               | NA               |
|                              |         | (c) Summarise follow-up time (eg, average and total amount)                                                                                                                                       | NA               |
| Outcome data                 | 15*     | Report numbers of outcome events or summary measures over time                                                                                                                                    | 7-9,<br>table 2  |

|    |                          |    |                                                                                                                                                                                                              |
|----|--------------------------|----|--------------------------------------------------------------------------------------------------------------------------------------------------------------------------------------------------------------|
| 1  |                          |    |                                                                                                                                                                                                              |
| 2  |                          |    |                                                                                                                                                                                                              |
| 3  | Main results             | 16 | (a) Give unadjusted estimates and, if applicable, confounder-adjusted estimates and their precision (eg, 95% confidence interval). Make clear which confounders were adjusted for and why they were included |
| 4  |                          |    |                                                                                                                                                                                                              |
| 5  |                          |    |                                                                                                                                                                                                              |
| 6  |                          |    | (b) Report category boundaries when continuous variables were categorized                                                                                                                                    |
| 7  |                          |    |                                                                                                                                                                                                              |
| 8  |                          |    | (c) If relevant, consider translating estimates of relative risk into absolute risk for a meaningful time period                                                                                             |
| 9  |                          |    |                                                                                                                                                                                                              |
| 10 | Other analyses           | 17 | Report other analyses done—eg analyses of subgroups and interactions, and sensitivity analyses                                                                                                               |
| 11 |                          |    |                                                                                                                                                                                                              |
| 12 |                          |    |                                                                                                                                                                                                              |
| 13 | <b>Discussion</b>        |    |                                                                                                                                                                                                              |
| 14 | Key results              | 18 | Summarise key results with reference to study objectives                                                                                                                                                     |
| 15 | Limitations              | 19 | Discuss limitations of the study, taking into account sources of potential bias or imprecision. Discuss both direction and magnitude of any potential bias                                                   |
| 16 |                          |    |                                                                                                                                                                                                              |
| 17 | Interpretation           | 20 | Give a cautious overall interpretation of results considering objectives, limitations, multiplicity of analyses, results from similar studies, and other relevant evidence                                   |
| 18 |                          |    |                                                                                                                                                                                                              |
| 19 | Generalisability         | 21 | Discuss the generalisability (external validity) of the study results                                                                                                                                        |
| 20 |                          |    |                                                                                                                                                                                                              |
| 21 |                          |    |                                                                                                                                                                                                              |
| 22 | <b>Other information</b> |    |                                                                                                                                                                                                              |
| 23 | Funding                  | 22 | Give the source of funding and the role of the funders for the present study and, if applicable, for the original study on which the present article is based                                                |
| 24 |                          |    |                                                                                                                                                                                                              |
| 25 |                          |    |                                                                                                                                                                                                              |
| 26 |                          |    |                                                                                                                                                                                                              |
| 27 |                          |    |                                                                                                                                                                                                              |
| 28 |                          |    |                                                                                                                                                                                                              |
| 29 |                          |    |                                                                                                                                                                                                              |
| 30 |                          |    |                                                                                                                                                                                                              |
| 31 |                          |    |                                                                                                                                                                                                              |
| 32 |                          |    |                                                                                                                                                                                                              |
| 33 |                          |    |                                                                                                                                                                                                              |
| 34 |                          |    |                                                                                                                                                                                                              |
| 35 |                          |    |                                                                                                                                                                                                              |
| 36 |                          |    |                                                                                                                                                                                                              |
| 37 |                          |    |                                                                                                                                                                                                              |
| 38 |                          |    |                                                                                                                                                                                                              |
| 39 |                          |    |                                                                                                                                                                                                              |
| 40 |                          |    |                                                                                                                                                                                                              |
| 41 |                          |    |                                                                                                                                                                                                              |
| 42 |                          |    |                                                                                                                                                                                                              |
| 43 |                          |    |                                                                                                                                                                                                              |
| 44 |                          |    |                                                                                                                                                                                                              |
| 45 |                          |    |                                                                                                                                                                                                              |
| 46 |                          |    |                                                                                                                                                                                                              |
| 47 |                          |    |                                                                                                                                                                                                              |
| 48 |                          |    |                                                                                                                                                                                                              |
| 49 |                          |    |                                                                                                                                                                                                              |
| 50 |                          |    |                                                                                                                                                                                                              |
| 51 |                          |    |                                                                                                                                                                                                              |
| 52 |                          |    |                                                                                                                                                                                                              |
| 53 |                          |    |                                                                                                                                                                                                              |
| 54 |                          |    |                                                                                                                                                                                                              |
| 55 |                          |    |                                                                                                                                                                                                              |
| 56 |                          |    |                                                                                                                                                                                                              |
| 57 |                          |    |                                                                                                                                                                                                              |
| 58 |                          |    |                                                                                                                                                                                                              |
| 59 |                          |    |                                                                                                                                                                                                              |
| 60 |                          |    |                                                                                                                                                                                                              |

\*Give information separately for exposed and unexposed groups.

**Note:** An Explanation and Elaboration article discusses each checklist item and gives methodological background and published examples of transparent reporting. The STROBE checklist is best used in conjunction with this article (freely available on the Web sites of PLoS Medicine at <http://www.plosmedicine.org/>, Annals of Internal Medicine at <http://www.annals.org/>, and Epidemiology at <http://www.epidem.com/>). Information on the STROBE Initiative is available at <http://www.strobe-statement.org>.
