# Supplementary material for: Observational retrospective study of the association of initial healthcare provider for new-onset low back pain with early and long-term opioid use
Source: PubMed Central journal article supplement — BMJ Open. 2019 Sep 20;9(9):e028633. doi: 10.1136/bmjopen-2018-028633 (PMC6756340; doi:10.1136/bmjopen-2018-028633), 2019-09-20
Supplement: bmjopen-2018-028633supp001.pdf [file bmjopen-2018-028633supp001.pdf]

**Appendix 1: ICD-9 and CPT Codes for Inclusion/Exclusion Criteria****Appendix 1a: Drugs classified as opioids**

The following drugs were identified as opioids with over 10,000 NDC codes: Buprenorphine, Codeine, Dihydrocodeine, Fentanyl LA, Fentanyl SA, Hydrocodone LA, Hydrocodone SA, Hydromorphone LA, Hydromorphone SA, Levomethadyl, Levorphanol, Meperidine, Methadone, Morphine LA, Morphine SA, Naltrexone, Opium, Oxycodone LA, Oxycodone SA, Oxymorphone LA, Oxymorphone SA, Pentazocine, Propoxyphene, Tapentadol LA, Tapentadol SA, Tramadol LA, Tramadol SA.

**Appendix 1b: ICD-9 LBP Diagnoses Inclusion/Exclusion Criteria**

| ICD-9 code | Description                                                                               | Include as location-specific LBP index diagnosis | Exclusion if in clean period prior to index diagnosis | Exclusion if on index date or within 3 months afterwards |
|------------|-------------------------------------------------------------------------------------------|--------------------------------------------------|-------------------------------------------------------|----------------------------------------------------------|
| 353.4      | Lumbosacral root lesions, not elsewhere classified                                        | x                                                | X                                                     |                                                          |
| 721.3      | Lumbosacral spondylosis without myelopathy                                                | x                                                | X                                                     |                                                          |
| 721.42     | Spondylosis with myelopathy, lumbar region                                                | x                                                | X                                                     |                                                          |
| 722.1      | Displacement of thoracic or lumbar intervertebral disc without myelopathy                 | x                                                | X                                                     |                                                          |
| 722.32     | Schmorl nodes, lumbar region                                                              | x                                                | X                                                     |                                                          |
| 722.51     | Degeneration of thoracic or lumbar intervertebral disc                                    | x                                                | X                                                     |                                                          |
| 722.52     | Degeneration of lumbar or lumbosacral intervertebral disc                                 | x                                                | X                                                     |                                                          |
| 722.93     | Other and unspecified disc disorder of lumbar region                                      | x                                                | X                                                     |                                                          |
| 724.2      | Lumbago                                                                                   | x                                                | X                                                     |                                                          |
| 724.3      | Sciatica                                                                                  | x                                                | X                                                     |                                                          |
| 724.4      | Thoracic or lumbosacral neuritis or radiculitis, unspecified                              | x                                                | X                                                     |                                                          |
| 724.5      | Unspecified backache                                                                      | x                                                | X                                                     |                                                          |
| 724.6      | Disorders of sacrum                                                                       | x                                                | X                                                     |                                                          |
| 739.3      | Non-allopathic lesion of lumbar region, not elsewhere classified                          | x                                                | X                                                     |                                                          |
| 739.4      | Non-allopathic lesion of sacral region, not elsewhere classified                          | x                                                | X                                                     |                                                          |
| 846.0      | Sprain and strain of lumbosacral (joint) (ligament)                                       | x                                                | X                                                     |                                                          |
| 846.1      | Sprain and strain of sacroiliac (ligament)                                                | x                                                | X                                                     |                                                          |
| 846.2      | Sprain and strain of sacrospinatus (ligament)                                             | x                                                | X                                                     |                                                          |
| 846.3      | Sprain and strain of sacrotuberous (ligament)                                             | x                                                | X                                                     |                                                          |
| 846.8      | Other specified sites of sacroiliac region sprain and strain                              | x                                                | X                                                     |                                                          |
| 846.9      | Unspecified site of sacroiliac region sprain and strain                                   | x                                                | X                                                     |                                                          |
| 847.2      | Lumbar sprain and strain                                                                  | x                                                | X                                                     |                                                          |
| 847.3      | Sprain and strain of sacrum                                                               | x                                                | X                                                     |                                                          |
| 847.4      | Sprain and strain of coccyx                                                               | x                                                | X                                                     |                                                          |
| 722.10     | Displacement of lumbar intervertebral disc without myelopathy                             | x                                                | X                                                     |                                                          |
| 722.73     | Intervertebral disc herniation Intervertebral disc disorder with myelopathy lumbar region | x                                                | X                                                     |                                                          |
| 724.02     | Spinal stenosis, lumbar region, without neurogenic claudication                           | x                                                | X                                                     |                                                          |
| 724.03     | Spinal stenosis, lumbar region, with neurogenic claudication                              | x                                                | X                                                     |                                                          |
| 756.11     | Spondylolysis, lumbosacral region (congenital)                                            | x                                                | X                                                     |                                                          |
| 721.5      | Kissing spine                                                                             |                                                  | X                                                     |                                                          |
| 721.6      | Ankylosing vertebral hyperostosis                                                         |                                                  | X                                                     |                                                          |
| 721.7      | Traumatic spondylopathy                                                                   |                                                  | X                                                     |                                                          |
| 721.8      | Other allied disorders of spine                                                           |                                                  | X                                                     |                                                          |

|               |                                                                       |  |   |   |
|---------------|-----------------------------------------------------------------------|--|---|---|
| 721.90        | Spondylosis of unspecified site without mention of myelopathy         |  | x |   |
| 721.91        | Spondylosis of unspecified site with myelopathy                       |  | x |   |
| 722.30        | Schmorl nodes, unspecified region                                     |  | x |   |
| 722.90        | Other and unspecified disc disorder of unspecified region             |  | x |   |
| 724.8         | Other symptoms referable to back                                      |  | x |   |
| 724.9         | Other unspecified back disorders                                      |  | x |   |
| 847.9         | Sprain and strain of unspecified site of back                         |  | x |   |
| 722.2         | Displacement of intervertebral disc, site unspecified, w/o myelopathy |  | x |   |
| 722.6         | Degeneration of intervertebral disc site unspecified                  |  | x |   |
| 724.00        | Spinal stenosis of unspecified region                                 |  | x |   |
| 724.09        | Spinal stenosis of other region                                       |  | x |   |
| 738.4         | Acquired spondylolisthesis                                            |  | x |   |
| 738.5         | Other acquired deformity of back or spine                             |  | x |   |
| 756.12        | Spondylolisthesis (congenital)                                        |  | x |   |
| 806.0-806.9   | Fracture of vertebral column with spinal cord injury                  |  | x | x |
| 805.0-805.9   | Fracture of vertebral column without mention of spinal cord injury    |  | x | x |
| 733.1x        | Pathologic fractures                                                  |  | x | x |
| 839.00-839.59 | Vertebral dislocations                                                |  | x | x |
| 720.0-720.9   | Inflammatory spondyloarthropathies                                    |  | x | x |
| 324.1         | Intraspinal abscess                                                   |  | x | x |
| 140-239.9     | Cancer/neoplasms                                                      |  | x | x |
| 730-730.99    | Osteomyelitis                                                         |  | x | x |
| 353.2         | Cervical root lesions, not elsewhere classified                       |  |   |   |
| 353.3         | Thoracic root lesions, not elsewhere classified                       |  |   |   |
| 721.0         | Cervical spondylosis without myelopathy                               |  |   |   |
| 721.1         | Cervical spondylosis with myelopathy                                  |  |   |   |
| 721.2         | Thoracic spondylosis without myelopathy                               |  |   |   |
| 721.41        | Spondylosis with myelopathy, thoracic region                          |  |   |   |
| 722.0         | Displacement of cervical intervertebral disc without myelopathy       |  |   |   |
| 722.11        | Displacement of thoracic intervertebral disc without myelopathy       |  |   |   |
| 722.4         | Degeneration of cervical intervertebral disc                          |  |   |   |
| 722.71        | Intervertebral disc disorder with myelopathy, cervical region         |  |   |   |
| 722.72        | Intervertebral disc disorder with myelopathy, thoracic region         |  |   |   |
| 722.81        | Postlaminectomy syndrome, cervical region                             |  |   |   |
| 722.82        | Postlaminectomy syndrome, thoracic region                             |  |   |   |
| 722.91        | Other and unspecified disc disorder, cervical region                  |  |   |   |
| 722.92        | Other and unspecified disc disorder, thoracic region                  |  |   |   |
| 723.0         | Spinal stenosis in cervical region                                    |  |   |   |

|        |                                      |  |  |  |
|--------|--------------------------------------|--|--|--|
| 723.4  | Brachial neuritis or radiculitis NOS |  |  |  |
| 724.01 | Spinal stenosis, thoracic region     |  |  |  |

**Appendix 1c: ICD-9 Procedures for Exclusion Criteria**

| ICD-9 code | Description                                                                                      |
|------------|--------------------------------------------------------------------------------------------------|
| 03.01      | Removal Of Foreign Body From Spinal Canal                                                        |
| 03.02      | Reopening Of Laminectomy Site                                                                    |
| 03.09      | Other Exploration And Decompression Of Spinal Cana                                               |
| 03.1       | Division Of Intraspinal Nerve Root                                                               |
| 03.2x      | chordotomy                                                                                       |
| 03.4       | Excision Or Destruction Of Lesion Of Spinal Cord Or Spinal Meninges                              |
| 03.5x      | Plastic Operations On Spinal Cord Structures (multiple subcat.)                                  |
| 03.6       | Lysis Of Adhesions Of Spinal Cord And Nerve Roots                                                |
| 03.7       | Shunt Of Spinal Theca                                                                            |
| 03.8       | Injection Of Destructive Agent Into Spinal Canal                                                 |
| 03.93      | Insert/Replace Spinal Neurostimulator                                                            |
| 03.94      | Removal Of Spinal Neurostimulator                                                                |
| 03.97      | Revision Of Spinal Thecal Shunt                                                                  |
| 03.98      | Removal Of Spinal Thecal Shunt                                                                   |
| 80.50      | Excision Or Destruction Of Intervertebral Disc, Unspecified                                      |
| 80.51      | Excision Of Intervertebral Disc                                                                  |
| 80.52      | Intervertebral Chemonucleolysis                                                                  |
| 80.53      | Repair Of The Anulus Fibrosus With Graft Or Prosthesis                                           |
| 80.54      | Other And Unspecified Repair Of The Anulus Fibrosus                                              |
| 80.59      | Other Destruction Of Intervertebral Disc                                                         |
| 81.00      | Spinal Fusion, Not Otherwise Specified                                                           |
| 81.01      | Atlas-Axis Spinal Fusion                                                                         |
| 81.02      | Other Cervical Fusion Of The Anterior Column, Anterior Technique                                 |
| 81.03      | Other Cervical Fusion Of The Posterior Column, Posterior Technique                               |
| 81.04      | Dorsal And Dorsolumbar Fusion Of The Anterior Column, Anterior Technique                         |
| 81.05      | Dorsal And Dorsolumbar Fusion Of The Posterior Column, Posterior Technique                       |
| 81.06      | Lumbar And Lumbosacral Fusion Of The Anterior Column, Anterior Technique                         |
| 81.07      | Lumbar And Lumbosacral Fusion Of The Posterior Column, Lateral Transverse Process Technique      |
| 81.08      | Lumbar And Lumbosacral Fusion Of The Anterior Column, Posterior Technique                        |
| 81.09      | Other spinal fusion ? No longer in use?                                                          |
| 81.30      | Refusion Of Spine, Not Otherwise Specified                                                       |
| 81.31      | Refusion Of Atlas-Axis Spine                                                                     |
| 81.32      | Refusion Of Other Cervical Spine, Anterior Column, Anterior Technique                            |
| 81.33      | Refusion Of Other Cervical Spine, Posterior Column, Posterior Technique                          |
| 81.34      | Refusion Of Dorsal And Dorsolumbar Spine, Anterior Column, Anterior Technique                    |
| 81.35      | Refusion Of Dorsal And Dorsolumbar Spine, Posterior Column, Posterior Technique                  |
| 81.36      | Refusion Of Lumbar And Lumbosacral Spine, Anterior Column, Anterior Technique                    |
| 81.37      | Refusion Of Lumbar And Lumbosacral Spine, Posterior Column, Lateral Transverse Process Technique |
| 81.38      | Refusion Of Lumbar And Lumbosacral Spine, Anterior Column, Posterior Technique                   |

|       |                                                                                       |
|-------|---------------------------------------------------------------------------------------|
| 81.39 | Refusion Of Spine, Not Elsewhere Classified                                           |
| 81.63 | Fusion Or Refusion Of 4-8 Vertebrae                                                   |
| 81.64 | Fusion Or Refusion Of 9 Or More Vertebrae                                             |
| 84.51 | Insertion Of Interbody Spinal Fusion Device                                           |
| 84.58 | Implantation of interspinous process decompression device                             |
| 84.59 | Insert Of Other Spinal Devices                                                        |
| 84.60 | Insertion Of Spinal Disc Prosthesis; Not Otherwise Specified                          |
| 84.61 | Insertion Of Partial Spinal Disc Prosthesis, Cervical                                 |
| 84.62 | Insertion Of Total Spinal Disc Prosthesis, Cervical                                   |
| 84.63 | Insertion Of Spinal Disc Prosthesis, Thoracic                                         |
| 84.64 | Insertion Of Partial Spinal Disc Prosthesis, Lumbosacral                              |
| 84.65 | Insertion Of Total Spinal Disc Prosthesis, Lumbosacral                                |
| 84.66 | Revision Or Replacement Of Artificial Spinal Disc Prosthesis                          |
| 84.67 | Revision Or Replacement Of Artificial Spinal Disc Prosthesis, Thoracic                |
| 84.68 | Revision Or Replacement Of Artificial Spinal Disc Prosthesis, Lumbosacral             |
| 84.69 | Revision Or Replacement Of Artificial Spinal Disc Prosthesis, Not Otherwise Specified |
| 84.80 | Insertion Or Replacement Of Interspinous Process Device(s)                            |
| 84.81 | Revision Of Interspinous Process Device(s)                                            |
| 84.82 | Insertion Or Replacement Of Pedicle-Based Dynamic Stabilization Device(s)             |
| 84.83 | Revision Of Pedicle-Based Dynamic Stabilization Device(s)                             |
| 85.84 | Insertion Or Replacement Of Facet Replacement Device(s)                               |
| 84.85 | Revision Of Facet Replacement Device(s)                                               |

**Appendix 1d: CPT Codes for Exclusion Criteria**

| CPT code | Description                                                                                                                                                                                                     |
|----------|-----------------------------------------------------------------------------------------------------------------------------------------------------------------------------------------------------------------|
| 00630    | anesthesia for procedures in lumbar region; not otherwise specified.                                                                                                                                            |
| 00670    | anesthesia for extensive spine and spinal cord procedures.                                                                                                                                                      |
| 06300    | vertebral corpectomy (vertebral body resection), partial or complete, for excision of intraspinal lesion, single segment; extradural, cervical                                                                  |
| 20250    | biopsy, vertebral body, open, thoracic                                                                                                                                                                          |
| 20930    | allograft for spine surgery only; morselized (list separately in addition to code for primary procedure)                                                                                                        |
| 20936    | autograft for spine surgery only (includes harvesting the graft); local (eg, ribs, spinous process, or lamina fragments) obtained from same incision                                                            |
| 20937    | autograft for spine surgery only (includes harvesting the graft); morselized (through separate skin or fascial incision) (list separately in addition to code for primary procedure)                            |
| 20938    | autograft for spine surgery only (includes harvesting the graft); structural, bicortical or tricortical (through separate skin or fascial incision) (list separately in addition to code for primary procedure) |
| 22010    | incision & drainage: deep abscess: posterior spine; cervical/thoracic/cervicothoracic                                                                                                                           |
| 22015    | incision & drainage: deep abscess: posterior spine; lumbar/sacral/lumbosacral                                                                                                                                   |
| 22100    | partial excision of posterior vertebral component (eg, spinous process, lamina or facet) for intrinsic bony lesion, single vertebral segment; cervical                                                          |
| 22101    | partial excision of posterior vertebral component (eg, spinous process, lamina or facet) for intrinsic bony lesion, single vertebral segment; thoracic                                                          |
| 22102    | partial excision of posterior vertebral component (eg, spinous process, lamina or facet) for intrinsic bony lesion, single vertebral segment; lumbar                                                            |
| 22103    | partial excision of posterior vertebral component (eg, spinous process, lamina or facet) for intrinsic bony lesion, single vertebral segment; each additional segment                                           |
| 22110    | partial excision of vertebral body, for intrinsic bony lesion, without decompression of spinal cord or nerve root(s), single vertebral segment; cervical                                                        |
| 22112    | partial excision of vertebral body, for intrinsic bony lesion, without decompression of spinal cord or nerve root(s), single vertebral segment; thoracic                                                        |
| 22114    | partial excision of vertebral body, for intrinsic bony lesion, without decompression of spinal cord or nerve root(s), single vertebral segment; lumbar                                                          |
| 22116    | partial excision of vertebral body, for intrinsic bony lesion, without decompression of spinal cord or nerve root(s), single vertebral segment; each additional vertebral segment                               |
| 22206    | osteotomy of spine, posterior or posterolateral approach, three columns, one vertebral segment (eg, pedicle/vertebral body subtraction); thoracic                                                               |
| 22207    | osteotomy of spine, posterior or posterolateral approach, three columns, one vertebral segment (eg, pedicle/vertebral body subtraction); lumbar                                                                 |
| 22208    | osteotomy of spine, posterior or posterolateral approach, three columns, one vertebral segment (eg, pedicle/vertebral body subtraction); each additional vertebral segment                                      |
| 22210    | osteotomy of spine, posterior or posterolateral approach, one vertebral segment; cervical                                                                                                                       |
| 22212    | osteotomy of spine, posterior or posterolateral approach, one vertebral segment; thoracic                                                                                                                       |
| 22214    | osteotomy of spine, posterior or posterolateral approach, one vertebral segment; lumbar                                                                                                                         |
| 22216    | osteotomy of spine, posterior or posterolateral approach, one vertebral segment; each additional vertebral segment (list separately in addition to primary procedure)                                           |
| 22220    | osteotomy of spine, including discectomy, anterior approach, single vertebral segment; cervical                                                                                                                 |

|       |                                                                                                                                                                                                                                                                                                                                                                                |
|-------|--------------------------------------------------------------------------------------------------------------------------------------------------------------------------------------------------------------------------------------------------------------------------------------------------------------------------------------------------------------------------------|
| 22222 | osteotomy of spine, including discectomy, anterior approach, single vertebral segment; thoracic                                                                                                                                                                                                                                                                                |
| 22224 | osteotomy of spine, including discectomy, anterior approach, single vertebral segment; lumbar                                                                                                                                                                                                                                                                                  |
| 22226 | osteotomy of spine, including discectomy, anterior approach, single vertebral segment; each additional vertebral segment                                                                                                                                                                                                                                                       |
| 22305 | closed treatment of vertebral process fracture(s)                                                                                                                                                                                                                                                                                                                              |
| 22310 | closed treatment of vertebral body fracture(s), without manipulation, requiring and including casting or bracing                                                                                                                                                                                                                                                               |
| 22315 | closed treatment of vertebral fracture(s) and/or dislocation(s) requiring casting or bracing, with and including casting and/or bracing, with or without anesthesia, by manipulation or traction                                                                                                                                                                               |
| 22318 | open treatment and/or reduction of odontoid fracture(s) and or dislocation(s) (including os odontoideum), anterior approach, including placement of internal fixation; without grafting                                                                                                                                                                                        |
| 22319 | open treatment and/or reduction of odontoid fracture(s) and or dislocation(s) (including os odontoideum), anterior approach, including placement of internal fixation; with grafting                                                                                                                                                                                           |
| 22325 | open treatment and/or reduction of vertebral fracture(s) and/or dislocation(s), posterior approach, 1 fractured vertebra or dislocated segment; lumbar                                                                                                                                                                                                                         |
| 22326 | open treatment and/or reduction of vertebral fracture(s) and/or dislocation(s), posterior approach, one fractured vertebra or dislocated segment; cervical                                                                                                                                                                                                                     |
| 22327 | open treatment and/or reduction of vertebral fracture(s) and/or dislocation(s), posterior approach, one fractured vertebra or dislocated segment; thoracic                                                                                                                                                                                                                     |
| 22328 | open treatment and/or reduction of vertebral fracture(s) and/or dislocation(s), posterior approach, one fractured vertebra or dislocated segment; each additional fractured vertebra or dislocated segment                                                                                                                                                                     |
| 22505 | manipulation of spine requiring anesthesia, any region                                                                                                                                                                                                                                                                                                                         |
| 22511 | percutaneous vertebroplasty (bone biopsy included when performed), 1 vertebral body, unilateral or bilateral injection, inclusive of all imaging guidance; lumbosacral                                                                                                                                                                                                         |
| 22513 | percutaneous vertebral augmentation, including cavity creation (fracture reduction and bone biopsy included when performed) using mechanical device (eg, kyphoplasty), 1 vertebral body, unilateral or bilateral cannulation, inclusive of all imaging guidance; thoracic                                                                                                      |
| 22514 | percutaneous vertebral augmentation, including cavity creation (fracture reduction and bone biopsy included when performed) using mechanical device (eg, kyphoplasty), 1 vertebral body, unilateral or bilateral cannulation, inclusive of all imaging guidance; lumbar                                                                                                        |
| 22515 | percutaneous vertebral augmentation, including cavity creation (fracture reduction and bone biopsy included when performed) using mechanical device (eg, kyphoplasty), 1 vertebral body, unilateral or bilateral cannulation, inclusive of all imaging guidance; each additional thoracic or lumbar vertebral body (list separately in addition to code for primary procedure) |
| 22520 | percutaneous vertebroplasty, one vertebral body, unilateral or bilateral injection; thoracic                                                                                                                                                                                                                                                                                   |
| 22521 | percutaneous vertebroplasty, one vertebral body, unilateral or bilateral injection; lumbar                                                                                                                                                                                                                                                                                     |
| 22522 | percutaneous vertebroplasty each additional thoracic or lumbar vertebral body                                                                                                                                                                                                                                                                                                  |
| 22523 | percutaneous vertebral augmentation, including cavity creation (fracture reduction and bone biopsy included when performed) using mechanical device, one vertebral body, unilateral or bilateral cannulation (eg, kyphoplasty); thoracic                                                                                                                                       |
| 22524 | percutaneous vertebral augmentation, including cavity creation (fracture reduction and bone biopsy included when performed) using mechanical device, one vertebral body, unilateral or bilateral cannulation (eg, kyphoplasty); lumbar                                                                                                                                         |



|       |                                                                                                                                                                                                                                                                                   |
|-------|-----------------------------------------------------------------------------------------------------------------------------------------------------------------------------------------------------------------------------------------------------------------------------------|
| 22525 | percutaneous vertebral augmentation, including cavity creation (fracture reduction and bone biopsy included when performed) using mechanical device, one vertebral body, unilateral or bilateral cannulation (eg, kyphoplasty); each additional thoracic or lumbar vertebral body |
| 22526 | percutaneous intradiscal electrothermal annuloplasty, unilateral or bilateral including fluoroscopic guidance; single level                                                                                                                                                       |
| 22527 | percutaneous intradiscal electrothermal annuloplasty, unilateral or bilateral including fluoroscopic guidance; one or more additional levels                                                                                                                                      |
| 22532 | arthrodesis, lateral extracavitary technique, including minimal discectomy to prepare interspace (other than for decompression); thoracic                                                                                                                                         |
| 22533 | arthrodesis, lateral extracavitary technique, including minimal discectomy to prepare interspace (other than for decompression); lumbar                                                                                                                                           |
| 22534 | add-on code to describe each additional vertebral segment on which the arthrodesis using lateral extracavitary approach is performed, after the first segment. this code should be used in conjunction with cpt code 22532 and 22533.                                             |
| 22548 | arthrodesis, anterior transoral or extraoral technique, clivus-c1-c2 (atlas-axis), with or without excision of odontoid process                                                                                                                                                   |
| 22551 | arthrodesis, anterior interbody, including disc space preparation, discectomy, osteophylectomy and decompression of spinal cord and/or nerve roots; cervical below c2                                                                                                             |
| 22554 | arthrodesis, anterior interbody technique, including minimal discectomy to prepare interspace (other than for decompression); cervical below c2                                                                                                                                   |
| 22556 | arthrodesis, anterior interbody technique, including minimal discectomy to prepare interspace (other than for decompression); thoracic                                                                                                                                            |
| 22558 | anterior lumbar interbody fusion, first interspace                                                                                                                                                                                                                                |
| 22585 | anterior lumbar interbody fusion, additional interspace                                                                                                                                                                                                                           |
| 22586 | arthrodesis, pre-sacral interbody technique, including disc space preparation, discectomy, with posterior instrumentation, with image guidance, includes bone graft when performed, l5-s1 interspace                                                                              |
| 22590 | arthrodesis, posterior technique, craniocervical (occiput-c2)                                                                                                                                                                                                                     |
| 22595 | arthrodesis, posterior technique, atlas-axis (c1-c2)                                                                                                                                                                                                                              |
| 22600 | arthrodesis, posterior or posterolateral technique, single level; cervical below c2 segment                                                                                                                                                                                       |
| 22610 | arthrodesis, posterior or posterolateral technique, single level; thoracic (with or without lateral transverse technique)                                                                                                                                                         |
| 22612 | arthrodesis, posterior or posterolateral technique, single level; lumbar (with or without lateral transverse technique)                                                                                                                                                           |
| 22614 | arthrodesis, posterior or posterolateral technique, single level; each additional vertebral segment                                                                                                                                                                               |
| 22630 | arthrodesis, posterior interbody technique, including laminectomy and/or discectomy to prepare interspace (other than for decompression), single interspace; lumbar                                                                                                               |
| 22632 | posterior lumbar interbody fusion, each additional interspace                                                                                                                                                                                                                     |
| 22633 | arthrodesis, combined posterior or posterolateral technique with posterior interbody technique including laminectomy and/or discectomy sufficient to prepare interspace (other than for decompression), single interspace and segment; lumbar                                     |
| 22634 | arthrodesis, combined posterior or posterolateral technique with posterior interbody technique including laminectomy and/or discectomy sufficient to prepare interspace (other than for decompression), single interspace and segment; each additional interspace and segment     |
| 22800 | arthrodesis, posterior, for spinal deformity, with or without cast; up to 6 vertebral segments                                                                                                                                                                                    |

|       |                                                                                                                                                                                                                                     |
|-------|-------------------------------------------------------------------------------------------------------------------------------------------------------------------------------------------------------------------------------------|
| 22802 | arthrodesis, posterior, for spinal deformity, with or without cast; 7 to 12 vertebral segments                                                                                                                                      |
| 22804 | arthrodesis, posterior, for spinal deformity, with or without cast; 13 or more vertebral segments                                                                                                                                   |
| 22808 | arthrodesis, anterior, for spinal deformity, with or without cast; 2 to 3 vertebral segments                                                                                                                                        |
| 22810 | arthrodesis, anterior, for spinal deformity, with or without cast; 4 to 7 vertebral segments                                                                                                                                        |
| 22812 | arthrodesis, anterior, for spinal deformity, with or without cast; 8 or more vertebral segments                                                                                                                                     |
| 22818 | kyphectomy, circumferential exposure of spine and resection of vertebral segment(s) (including body and posterior elements); single or 2 segments                                                                                   |
| 22819 | kyphectomy, circumferential exposure of spine and resection of vertebral segment(s) (including body and posterior elements); 3 or more segments                                                                                     |
| 22830 | exploration of spinal fusion                                                                                                                                                                                                        |
| 22840 | posterior non-segmental instrumentation (eg, harrington rod technique, pedicle fixation across one interspace, atlantoaxial transarticular screw fixation, sublaminar wiring at c1, facet screw fixation)                           |
| 22841 | internal spinal fixation by wiring of spinous processes                                                                                                                                                                             |
| 22842 | posterior segmental instrumentation (eg, pedicle fixation, dual rods with multiple hooks and sublaminar wires); 3 to 6 vertebral segments                                                                                           |
| 22843 | posterior segmental instrumentation (eg, pedicle fixation, dual rods with multiple hooks and sublaminar wires); 7 to 12 vertebral segments                                                                                          |
| 22844 | posterior segmental instrumentation (eg, pedicle fixation, dual rods with multiple hooks and sublaminar wires); 13 or more vertebral segments                                                                                       |
| 22845 | anterior instrumentation; 2 to 3 vertebral segments                                                                                                                                                                                 |
| 22846 | anterior instrumentation; 4 to 7 vertebral segments                                                                                                                                                                                 |
| 22847 | anterior instrumentation; 8 or more vertebral segments                                                                                                                                                                              |
| 22848 | pelvic fixation (attachment of caudal end of instrumentation to pelvic bony structures) other than sacrum                                                                                                                           |
| 22849 | reinsertion of spinal fixation device                                                                                                                                                                                               |
| 22850 | removal of posterior nonsegmental instrumentation (eg, harrington rod)                                                                                                                                                              |
| 22851 | application of intervertebral biomechanical device(s) (eg, synthetic cage(s), threaded bone dowel(s), methylmethacrylate) to vertebral defect or interspace                                                                         |
| 22852 | removal of posterior segmental instrumentation                                                                                                                                                                                      |
| 22855 | removal of anterior instrumentation                                                                                                                                                                                                 |
| 22856 | total disc arthroplasty (artificial disc), anterior approach, including discectomy with end plate preparation (includes osteophyctomy for nerve root or spinal cord decompression and microdissection), single interspace, cervical |
| 22857 | total disc arthroplasty (artificial disc), anterior approach, including discectomy to prepare interspace (other than for decompression), single interspace, lumbar                                                                  |
| 22861 | revision including replacement of total disc arthroplasty (artificial disc), anterior approach, single interspace; cervical                                                                                                         |
| 22862 | removal of total disc arthroplasty (artificial disc), anterior approach, single interspace; cervical                                                                                                                                |
| 22864 | removal of total disc arthroplasty (artificial disc), anterior approach, single interspace; cervical                                                                                                                                |
| 22865 | removal of total disc arthroplasty (artificial disc), anterior approach, single interspace; lumbar                                                                                                                                  |
| 27096 | injection procedure for si joint, arthrography, and/or anesthetic steroid                                                                                                                                                           |
| 62263 | percutaneous lysis of epidural adhesions using solution injection or mechanical means, including radiologic localization, multiple adhesiolysis sessions, two or more days                                                          |

|       |                                                                                                                                                                                                                                                                                                                                                                   |
|-------|-------------------------------------------------------------------------------------------------------------------------------------------------------------------------------------------------------------------------------------------------------------------------------------------------------------------------------------------------------------------|
| 62264 | percutaneous lysis of epidural adhesions using solution injection or mechanical means, including radiologic localization, multiple adhesiolysis sessions one day                                                                                                                                                                                                  |
| 62281 | injection/infusion of neurolytic substance (eg, alcohol, phenol, iced saline solutions), with or without other therapeutic substance; epidural, cervical or thoracic                                                                                                                                                                                              |
| 62282 | injection/infusion of neurolytic substance (eg, alcohol, phenol, iced saline solutions), with or without other therapeutic substance; epidural, lumbar, sacral (caudal)                                                                                                                                                                                           |
| 62287 | aspiration procedure, percutaneous, of nucleus pulposus of intervertebral disk, any method, single or multiple levels, lumbar.                                                                                                                                                                                                                                    |
| 62292 | injection procedure for chemonucleolysis, including discography, intervertebral disc, single or multiple levels, lumbar                                                                                                                                                                                                                                           |
| 62310 | injection, single (not via indwelling catheter), not including neurolytic substances, with or without contrast (for either localization or epidurography), of diagnostic or therapeutic substance(s) (including anesthetic, antispasmodic, opioid, steroid, other solution), epidural or subarachnoid; cervical or thoracic                                       |
| 62311 | injection, single (not via indwelling catheter), not including neurolytic substances, with or without contrast (for either localization or epidurography), of diagnostic or therapeutic substance(s) (including anesthetic, antispasmodic, opioid, steroid, other solution), epidural or subarachnoid; lumbar, sacral (caudal)                                    |
| 62318 | injection, including catheter placement, continuous infusion or intermittent bolus, not including neurolytic substances, with or without contrast (for either localization or epidurography), of diagnostic or therapeutic substance(s) (including anesthetic, antispasmodic, opioid, steroid, other solution), epidural or subarachnoid; cervical or thoracic    |
| 62319 | injection, including catheter placement, continuous infusion or intermittent bolus, not including neurolytic substances, with or without contrast (for either localization or epidurography), of diagnostic or therapeutic substance(s) (including anesthetic, antispasmodic, opioid, steroid, other solution), epidural or subarachnoid; lumbar, sacral (caudal) |
| 62322 | injection(s), of diagnostic or therapeutic substance(s) (eg, anesthetic, antispasmodic, opioid, steroid, other solution), not including neurolytic substances, including needle or catheter placement, interlaminar epidural or subarachnoid, lumbar or sacral (caudal) section                                                                                   |
| 62323 | injection(s), of diagnostic or therapeutic substance(s) (eg, anesthetic, antispasmodic, opioid, steroid, other solution), not including neurolytic substances, including needle or catheter placement, interlaminar epidural or subarachnoid, lumbar or sacral (caudal); with imaging guidance (ie, fluoroscopy or ct)                                            |
| 62350 | implantation, revision or repositioning of tunneled intrathecal or epidural catheter, for long-term medication administration via an external pump or implantable reservoir/infusion pump; without laminectomy                                                                                                                                                    |
| 62351 | implantation, revision or repositioning of tunneled intrathecal or epidural catheter, for long-term medication administration via an external pump or implantable reservoir/infusion pump; with laminectomy                                                                                                                                                       |
| 62355 | removal of previously implanted intrathecal or epidural catheter.                                                                                                                                                                                                                                                                                                 |
| 62360 | implantation or replacement of device for intrathecal or epidural drug infusion; subcutaneous reservoir                                                                                                                                                                                                                                                           |
| 62361 | implantation or replacement of device for intrathecal or epidural drug infusion; nonprogrammable pump                                                                                                                                                                                                                                                             |
| 62362 | implantation or replacement of device for intrathecal or epidural drug infusion; programmable pump, including preparation of pump, with or without programming                                                                                                                                                                                                    |
| 62365 | removal of subcutaneous reservoir or pump, previously implanted for intrathecal or epidural infusion                                                                                                                                                                                                                                                              |
| 62367 | electronic analysis of programmable, implanted pump for intrathecal or epidural drug infusion (includes evaluation of reservoir status, alarm status, drug prescription status); without reprogramming or refill                                                                                                                                                  |

|       |                                                                                                                                                                                                                                                                                         |
|-------|-----------------------------------------------------------------------------------------------------------------------------------------------------------------------------------------------------------------------------------------------------------------------------------------|
| 62368 | electronic analysis of programmable, implanted pump for intrathecal or epidural drug infusion (includes evaluation of reservoir status, alarm status, drug prescription status); with reprogramming                                                                                     |
| 62369 | electronic analysis of programmable, implanted pump for intrathecal or epidural drug infusion (includes evaluation of reservoir status, alarm status, drug prescription status); with reprogramming and refill                                                                          |
| 62370 | electronic analysis of programmable, implanted pump for intrathecal or epidural drug infusion (includes evaluation of reservoir status, alarm status, drug prescription status); with reprogramming and refill (requiring physician's skill)                                            |
| 63001 | laminectomy with exploration and/or decompression of spinal cord and/or cauda equina, without facetectomy, foraminotomy or discectomy (e.g., spinal stenosis), 1 or 2 vertebral segments; cervical                                                                                      |
| 63003 | laminectomy with exploration and/or decompression of spinal cord and/or cauda equina, without facetectomy, foraminotomy or discectomy (e.g., spinal stenosis), 1 or 2 vertebral segments; thoracic                                                                                      |
| 63005 | lumbar laminectomy without facetectomy, foraminotomy or discectomy, 1 or 2 segments                                                                                                                                                                                                     |
| 63011 | laminectomy with exploration and/or decompression of spinal cord and/or cauda equina, without facetectomy, foraminotomy or discectomy (e.g., spinal stenosis), 1 or 2 vertebral segments; sacral                                                                                        |
| 63012 | lumbar laminectomy for spondylolisthesis with removal of abnormal facet or pars interarticularis)                                                                                                                                                                                       |
| 63015 | laminectomy with exploration and/or decompression of spinal cord and/or cauda equina, without facetectomy, foraminotomy or discectomy (e.g., spinal stenosis), more than 2 vertebral segments; cervical                                                                                 |
| 63016 | laminectomy with exploration and/or decompression of spinal cord and/or cauda equina, without facetectomy, foraminotomy or discectomy (e.g., spinal stenosis), more than 2 vertebral segments; thoracic                                                                                 |
| 63017 | more than two segments                                                                                                                                                                                                                                                                  |
| 63020 | laminotomy (hemilaminectomy), with decompression of nerve root(s), including partial facetectomy, foraminotomy and/or excision of herniated intervertebral disc, including open and endoscopically-assisted approaches; 1 interspace, cervical                                          |
| 63030 | lumbar laminotomy including partial facetectomy, foraminotomy, and/or excision of herniated disc                                                                                                                                                                                        |
| 63035 | each additional interspace                                                                                                                                                                                                                                                              |
| 63040 | laminotomy (hemilaminectomy), with decompression of nerve root(s), including partial facetectomy, foraminotomy and/or excision of herniated intervertebral disc, reexploration, single interspace; cervical                                                                             |
| 63042 | re-exploration lumbar laminotomy, including partial facetectomy, foraminotomy, and/or excision of herniated disc                                                                                                                                                                        |
| 63043 | laminotomy with decompression of nerve root, each additional cervical interspace                                                                                                                                                                                                        |
| 63044 | each additional interspace                                                                                                                                                                                                                                                              |
| 63045 | laminectomy, facetectomy and foraminotomy (unilateral or bilateral with decompression of spinal cord, cauda equina and/or nerve root[s], [e.g., spinal or lateral recess stenosis]), single vertebral segment; cervical                                                                 |
| 63046 | laminectomy, facetectomy and foraminotomy (unilateral or bilateral with decompression of spinal cord, cauda equina and/or nerve root[s], [e.g., spinal or lateral recess stenosis]), single vertebral segment; thoracic                                                                 |
| 63047 | lumbar laminectomy, facetectomy and foraminotomy, single level)                                                                                                                                                                                                                         |
| 63048 | each additional segment                                                                                                                                                                                                                                                                 |
| 63050 | laminoplasty, cervical, with decompression of the spinal cord, 2 or more vertebral segments                                                                                                                                                                                             |
| 63051 | laminoplasty, cervical, with decompression of the spinal cord, 2 or more vertebral segments; with reconstruction of the posterior bony elements (including the application of bridging bone graft and non-segmental fixation devices (e.g., wire, suture, mini-plates), when performed) |

|       |                                                                                                                                                                                                                                                                   |
|-------|-------------------------------------------------------------------------------------------------------------------------------------------------------------------------------------------------------------------------------------------------------------------|
| 63055 | transpedicular approach with decompression of spinal cord, equina and/or nerve root(s) (e.g., herniated intervertebral disc), single segment; thoracic                                                                                                            |
| 63056 | transpedicular approach with decompression of spinal cord, equina and/or nerve root(s) (e.g., herniated intervertebral disc), single segment; lumbar (including transfacet, or lateral extraforaminal approach) (e.g., far lateral herniated intervertebral disc) |
| 63057 | transpedicular approach with decompression of spinal cord, each additional segmen                                                                                                                                                                                 |
| 63064 | costovertebral approach with decompression of spinal cord or nerve root(s) (e.g., herniated intervertebral disc), thoracic; single segment                                                                                                                        |
| 63066 | costovertebral approach with decompression of spinal cord or nerve roots, thoracic, each additional segment                                                                                                                                                       |
| 63075 | discectomy, anterior, with decompression of spinal cord and/or nerve root(s), including osteophytectomy; cervical, single interspace                                                                                                                              |
| 63076 | discectomy, anterior, with decompression of spinal cord and/or nerve root(s), including osteophytectomy; cervical, each additional interspac                                                                                                                      |
| 63077 | discectomy, anterior, with decompression of spinal cord and/or nerve root(s), including osteophytectomy; thoracic, single interspace                                                                                                                              |
| 63078 | discectomy, anterior, with decompression of spinal cord and/or nerve root(s), including osteophytectomy; thoracic, each additional interspace                                                                                                                     |
| 63081 | vertebral corpectomy (vertebral body resection), partial or complete, anterior approach with decompression of spinal cord and/or nerve root(s); cervical, single segment                                                                                          |
| 63082 | vertebral corpectomy (vertebral body resection), partial or complete, anterior approach with decompression of spinal cord and/or nerve root(s); cervical, each additional segment                                                                                 |
| 63085 | vertebral corpectomy (vertebral body resection), partial or complete, transthoracic approach with decompression of spinal cord and/or nerve root(s); thoracic, single segment                                                                                     |
| 63086 | vertebral corpectomy (vertebral body resection), partial or complete, transthoracic approach with decompression of spinal cord and/or nerve root(s); thoracic, each additional segment                                                                            |
| 63087 | vertebral corpectomy (vertebral body resection), partial or complete, combined thoracolumbar approach with decompression of spinal cord, cauda equina or nerve root(s), lower thoracic or lumbar; single segment                                                  |
| 63088 | vertebral corpectomy (vertebral body resection), partial or complete, combined thoracolumbar approach with decompression of spinal cord, cauda equina or nerve root(s), lower thoracic or lumbar; each additional segment                                         |
| 63090 | vertebral corpectomy (vertebral body resection), partial or complete, transperitoneal or retroperitoneal approach with decompression of spinal cord, cauda equina or nerve root(s), lower thoracic, lumbar, or sacral; single segment                             |
| 63091 | or retroperitoneal approach with decompression of spinal cord, cauda equina or nerve root(s), lower thoracic, lumbar, or sacral; each additional segment                                                                                                          |
| 63102 | vertebral corpectomy (vertebral body resection), partial or complete, lateral extracavitary approach with decompression of spinal cord and/or nerve root(s) (e.g., for tumor or retropulsed bone fragments); lumbar, single segment                               |
| 63103 | vertebral corpectomy (vertebral body resection), partial or complete, lateral extracavitary approach with decompression of spinal cord and/or nerve root(s) (e.g., for tumor or retropulsed bone fragments); thoracic or lumbar, each additional segment          |
| 63170 | laminectomy with myelotomy (e.g., bischof or drez type), cervical, thoracic, or thoracolumbar                                                                                                                                                                     |
| 63172 | laminectomy with drainage of intramedullary cyst/syrinx; to subarachnoid space                                                                                                                                                                                    |

|       |                                                                                                                                                                          |
|-------|--------------------------------------------------------------------------------------------------------------------------------------------------------------------------|
| 63173 | laminectomy with drainage of intramedullary cyst/syrinx; to peritoneal or pleural space                                                                                  |
| 63180 | laminectomy and section of dentate ligaments, with or without dural graft, cervical; 1 or 2 segments                                                                     |
| 63182 | laminectomy and section of dentate ligaments, with or without dural graft, cervical; more than 2 segments                                                                |
| 63185 | laminectomy with rhizotomy; 1 or 2 segments                                                                                                                              |
| 63190 | laminectomy with rhizotomy; more than 2 segments                                                                                                                         |
| 63191 | laminectomy with section of spinal accessory nerve                                                                                                                       |
| 63194 | laminectomy with cordotomy, with section of 1 spinothalamic tract, 1 stage; cervical                                                                                     |
| 63195 | laminectomy with cordotomy, with section of 1 spinothalamic tract, 1 stage; thoracic                                                                                     |
| 63196 | laminectomy with cordotomy, with section of both spinothalamic tracts, 1 stage; cervical                                                                                 |
| 63197 | laminectomy with cordotomy, with section of both spinothalamic tracts, 1 stage; thoracic                                                                                 |
| 63198 | laminectomy with cordotomy with section of both spinothalamic tracts, 2 stages within 14 days; cervical                                                                  |
| 63199 | laminectomy with cordotomy with section of both spinothalamic tracts, 2 stages within 14 days; thoracic                                                                  |
| 63200 | laminectomy, with release of tethered spinal cord, lumbar                                                                                                                |
| 63250 | laminectomy for excision or occlusion of arteriovenous malformation of spinal cord; cervical                                                                             |
| 63251 | laminectomy for excision or occlusion of arteriovenous malformation of spinal cord; thoracic                                                                             |
| 63252 | laminectomy for excision or occlusion of arteriovenous malformation of spinal cord; thoracolumbar                                                                        |
| 63265 | laminectomy for excision or evacuation of intraspinal lesion other than neoplasm, extradural; cervical                                                                   |
| 63266 | laminectomy for excision or evacuation of intraspinal lesion other than neoplasm, extradural; thoracic                                                                   |
| 63267 | laminectomy for excision or evacuation of intraspinal lesion other than neoplasm, extradural; lumbar                                                                     |
| 63268 | laminectomy for excision or evacuation of intraspinal lesion other than neoplasm, extradural; sacral                                                                     |
| 63270 | laminectomy for excision of intraspinal lesion other than neoplasm, intradural; cervical                                                                                 |
| 63271 | laminectomy for excision of intraspinal lesion other than neoplasm, intradural; thoracic                                                                                 |
| 63272 | laminectomy for excision of intraspinal lesion other than neoplasm, intradural; lumbar                                                                                   |
| 63273 | laminectomy for excision of intraspinal lesion other than neoplasm, intradural; sacral                                                                                   |
| 63275 | laminectomy for biopsy/excision of intraspinal neoplasm; extradural, cervical                                                                                            |
| 63276 | laminectomy for biopsy/excision of intraspinal neoplasm; extradural, thoracic                                                                                            |
| 63277 | laminectomy for biopsy/excision of intraspinal neoplasm; extradural, lumbar                                                                                              |
| 63278 | laminectomy for biopsy/excision of intraspinal neoplasm; extradural, sacral                                                                                              |
| 63280 | laminectomy for biopsy/excision of intraspinal neoplasm; intradural, extramedullary, cervical                                                                            |
| 63281 | laminectomy for biopsy/excision of intraspinal neoplasm; intradural, extramedullary, thoracic                                                                            |
| 63282 | laminectomy for biopsy/excision of intraspinal neoplasm; intradural, extramedullary, lumbar                                                                              |
| 63283 | laminectomy for biopsy/excision of intraspinal neoplasm; intradural, sacral                                                                                              |
| 63285 | laminectomy for biopsy/excision of intraspinal neoplasm; intradural, intramedullary, cervical                                                                            |
| 63286 | laminectomy for biopsy/excision of intraspinal neoplasm; intradural, intramedullary, thoracic                                                                            |
| 63287 | laminectomy for biopsy/excision of intraspinal neoplasm; intradural, intramedullary, thoracolumbar                                                                       |
| 63290 | laminectomy for biopsy/excision of intraspinal neoplasm; combined extradural-intradural lesion, any level                                                                |
| 63295 | osteoplastic reconstruction of dorsal spinal elements, following primary intraspinal procedure (list separately in addition to code for primary procedure)               |
| 63301 | vertebral corpectomy (vertebral body resection), partial or complete, for excision of intraspinal lesion, single segment; extradural, thoracic by transthoracic approach |

|       |                                                                                                                                                                                                         |
|-------|---------------------------------------------------------------------------------------------------------------------------------------------------------------------------------------------------------|
| 63302 | vertebral corpectomy (vertebral body resection), partial or complete, for excision of intraspinal lesion, single segment; extradural, thoracic by thoracolumbar approach                                |
| 63303 | vertebral corpectomy (vertebral body resection), partial or complete, for excision of intraspinal lesion, single segment; extradural, lumbar or sacral by transperitoneal or retroperitoneal approach   |
| 63304 | vertebral corpectomy (vertebral body resection), partial or complete, for excision of intraspinal lesion, single segment; intradural, cervical                                                          |
| 63305 | vertebral corpectomy (vertebral body resection), partial or complete, for excision of intraspinal lesion, single segment; intradural, thoracic by transthoracic approach                                |
| 63306 | vertebral corpectomy (vertebral body resection), partial or complete, for excision of intraspinal lesion, single segment; intradural, thoracic by thoracolumbar approach                                |
| 63307 | vertebral corpectomy (vertebral body resection), partial or complete, for excision of intraspinal lesion, single segment; intradural, lumbar or sacral by transperitoneal or retroperitoneal approach   |
| 63308 | vertebral corpectomy (vertebral body resection), partial or complete, for excision of intraspinal lesion, single segment; each additional segment                                                       |
| 63650 | dorsal column stimulator placements                                                                                                                                                                     |
| 63655 | laminectomy for implantation of neurostimulator electrodes, plate/paddle, epidural                                                                                                                      |
| 63660 | revision or removal of spinal neurostimulator electrodes                                                                                                                                                |
| 63661 | removal of spinal neurostimulator electrode percutaneous array(s), including fluoroscopy, when performed                                                                                                |
| 63662 | removal of spinal neurostimulator electrode plate/paddle(s) placed via laminotomy or laminectomy, including fluoroscopy, when performed                                                                 |
| 63663 | revision including replacement, when performed, of spinal neurostimulator electrode percutaneous array(s), including fluoroscopy, when performed                                                        |
| 63664 | revision including replacement, when performed, of spinal neurostimulator electrode plate/paddle(s) placed via laminotomy or laminectomy, including fluoroscopy, when performed                         |
| 63685 | insertion or replacement of spinal neurostimulator pulse generator or receiver, direct or inductive coupling                                                                                            |
| 63688 | revision including replacement, when performed, of spinal neurostimulator electrode plate/paddle(s) placed via laminotomy or laminectomy, including fluoroscopy, when performed                         |
| 64470 | injection, anesthetic agent and/or steroid, paravertebral facet joint or facet joint nerve; cervical or thoracic, single level                                                                          |
| 64472 | injection, anesthetic agent and/or steroid, paravertebral facet joint or facet joint nerve; cervical or thoracic, each additional level                                                                 |
| 64475 | injection, anesthetic agent and/or steroid, paravertebral facet joint or facet joint nerve; lumbar or sacral, single level                                                                              |
| 64476 | injection, anesthetic agent and/or steroid, paravertebral facet joint or facet joint nerve; lumbar or sacral, each additional level                                                                     |
| 64479 | injection, anesthetic agent and/or steroid, transforaminal epidural; cervical or thoracic, single level                                                                                                 |
| 64480 | injection, anesthetic agent and/or steroid, transforaminal epidural; cervical or thoracic, each additional level                                                                                        |
| 64483 | injection, anesthetic agent and/or steroid, transforaminal epidural; lumbar or sacral, single level                                                                                                     |
| 64484 | injection, anesthetic agent and/or steroid, transforaminal epidural; lumbar or sacral, each additional level                                                                                            |
| 64490 | injection(s), diagnostic or therapeutic agent, paravertebral facet (zygapophyseal) joint (or nerves innervating that joint) with image guidance (fluoroscopy or ct), cervical or thoracic; single level |
| 64491 | injection(s), diagnostic or therapeutic agent, paravertebral facet (zygapophyseal) joint (or nerves innervating that joint) with image guidance (fluoroscopy or ct), cervical or thoracic; second level |



|       |                                                                                                                                                                                                                                                                                                          |
|-------|----------------------------------------------------------------------------------------------------------------------------------------------------------------------------------------------------------------------------------------------------------------------------------------------------------|
| 64492 | injection(s), diagnostic or therapeutic agent, paravertebral facet (zygapophyseal) joint (or nerves innervating that joint) with image guidance (fluoroscopy or ct), cervical or thoracic; third and any additional level(s)                                                                             |
| 64493 | paravertebral facet joint injection, lumbar or sacral, single level                                                                                                                                                                                                                                      |
| 64494 | paravertebral facet joint injection, lumbar or sacral, second level                                                                                                                                                                                                                                      |
| 64495 | paravertebral facet joint injection, lumbar or sacral, third and each additional level                                                                                                                                                                                                                   |
| 64520 | Injection, anesthetic agent; lumbar or thoracic (paravertebral sympathetic)                                                                                                                                                                                                                              |
| 64553 | percutaneous implantation of neurostimulator electrode array; cranial nerve                                                                                                                                                                                                                              |
| 64622 | destruction by neurolytic agent, paravertebral facet joint nerve; lumbar or sacral, single level                                                                                                                                                                                                         |
| 64623 | lumbar or sacral, each additional level                                                                                                                                                                                                                                                                  |
| 64635 | destruction by neurolytic agent, paravertebral facet joint nerve; lumbar or sacral, single level with image guidance                                                                                                                                                                                     |
| 64636 | lumbar or sacral, each additional level with image guidance                                                                                                                                                                                                                                              |
| 95991 | refilling and maintenance of implantable pump or reservoir for drug delivery, spinal (intrathecal, epidural) or brain (intraventricular), includes electronic analysis of pump, when performed; requiring skill of a physician or other qualified health care professional                               |
| 0092T | total disc arthroplasty (artificial disc), anterior approach, including discectomy with end plate preparation (includes osteophyctomy for nerve root or spinal cord decompression and microdissection), each additional interspace, cervical (list separately in addition to code for primary procedure) |
| 0095T | removal of total disc arthroplasty (artificial disc), anterior approach, each additional interspace, cervical (list separately in addition to code for primary procedure)                                                                                                                                |
| 0098T | revision including replacement of total disc arthroplasty (artificial disc), anterior approach, each additional interspace, cervical (list separately in addition to code for primary procedure)                                                                                                         |
| 0163T | total disc arthroplasty (artificial disc), anterior approach, including discectomy to prepare interspace (other than for decompression), each additional interspace, lumbar (list separately in addition to code for primary procedure)                                                                  |
| 0164T | removal of total disc arthroplasty, (artificial disc), anterior approach, each additional interspace, lumbar (list separately in addition to code for primary procedure)                                                                                                                                 |
| 0165T | revision including replacement of total disc arthroplasty (artificial disc), anterior approach, each additional interspace, lumbar (list separately in addition to code for primary procedure)                                                                                                           |
| 0171T | insertion of posterior spinous process distraction device (including necessary removal of bone or ligament for insertion and imaging guidance), lumbar; single level                                                                                                                                     |
| 0172T | insertion of posterior spinous process distraction device (including necessary removal of bone or ligament for insertion and imaging guidance), lumbar; each additional level (list separately in addition to code for primary procedure)                                                                |
| 0215T | injection(s), diagnostic or therapeutic agent, paravertebral facet (zygapophyseal) joint (or nerves innervating that joint) with ultrasound guidance, cervical or thoracic; third and any additional level(s)                                                                                            |
| 0216T | injection(s), diagnostic or therapeutic agent, paravertebral facet (zygapophyseal) joint (or nerves innervating that joint) with ultrasound guidance, lumbar or sacral; single level                                                                                                                     |
| 0217T | injection(s), diagnostic or therapeutic agent, paravertebral facet (zygapophyseal) joint (or nerves innervating that joint) with ultrasound guidance, lumbar or sacral; second level                                                                                                                     |
| 0218T | injection(s), diagnostic or therapeutic agent, paravertebral facet (zygapophyseal) joint (or nerves innervating that joint) with ultrasound guidance, lumbar or sacral; third and any additional level(s)                                                                                                |
| 0230T | injection(s), anesthetic agent and/or steroid, transforaminal epidural, with ultrasound guidance, lumbar or sacral; single level                                                                                                                                                                         |



|       |                                                                                                                                                                                                                                                                             |
|-------|-----------------------------------------------------------------------------------------------------------------------------------------------------------------------------------------------------------------------------------------------------------------------------|
| 0231T | injection(s), anesthetic agent and/or steroid, transforaminal epidural, with ultrasound guidance, lumbar or sacral; each additional level                                                                                                                                   |
| 0282T | percutaneous or open implantation of neurostimulator electrode array(s), subcutaneous (peripheral subcutaneous field stimulation), including imaging guidance, when performed, cervical, thoracic or lumbar, for trial, including removal at the conclusion of trial period |
| 0283T | percutaneous or open implantation of neurostimulator electrode array(s), subcutaneous (peripheral subcutaneous field stimulation), including imaging guidance, when performed, cervical, thoracic or lumbar, permanent, with implantation of a pulse generator              |
| 0284T | revision or removal of pulse generator or electrodes, including imaging guidance, when performed, including addition of new electrodes, when performed                                                                                                                      |
